# Supplementary material for: Meta-Analysis of Food Effect on Oral Absorption of Efflux Transporter Substrate Drugs: Does Delayed Gastric Emptying Influence Drug Transport Kinetics?
Source: MDPI journal article supplement (doi:10.3390/pharmaceutics13071035), 2021-07-07
Supplement: s1 [file s1]

# Supplementary Materials: Meta-Analysis of Food Effect on Oral Absorption of Efflux Transporter Substrate Drugs: Does Delayed Gastric Emptying Influence Drug Transport Kinetics?

Sheena Sharma and Bhagwat Prasad

**Table S1.** Drugs with reported food-effect (FE) studies and their respective physicochemical and biochemical properties.

| Drug                  | Food-Effect Type             | Log Dose Number | Transport Saturation Index | Mechanism of Elimination                                                                                                | C <sub>max</sub> Change (%) | AUC Change (%) | References |
|-----------------------|------------------------------|-----------------|----------------------------|-------------------------------------------------------------------------------------------------------------------------|-----------------------------|----------------|------------|
| 5-Aminosalicylic acid | Negative                     | −0.48           | NS                         | Acetylation (metabolism)                                                                                                | −64.47                      | −47.75         | [1,2]      |
| 5-fluorouracil        | Negative                     | −0.86           | 61.50                      | BCRP (GI efflux), OAT2                                                                                                  | −70.43                      | −34.92         | [3]        |
| 6-Mercaptopurine      | Negative                     | −0.09           | NS                         | Aldehyde oxidase (AO), Methyltransferase, xanthine oxidase (XO), Xanthine dehydrogenase (XDH) (metabolism), MRP4, ENBT1 | −25                         | −25            | [4]        |
| Abacavir              | Negative on C <sub>max</sub> | 0.00            | 41.91                      | Alcohol dehydrogenase, UGTs (metabolism), P-gp, BCRP (GI efflux)                                                        | −26                         | −3.1           | [5,6]      |
| Abiraterone acetate   | Positive                     | 2.82            | 51.08                      | Esterase, CYP3A4, SULT2A1 (metabolism), P-gp (GI efflux)                                                                | 630.88                      | 343.29         | [7]        |
| ABT-102               | None                         | −0.10           | NS                         | NA                                                                                                                      | 6.98                        | 20.22          | [8,9]      |
| ABX-464               | Positive                     | 2.10            | NS                         | UGTs (metabolism)                                                                                                       | 183.67                      | 161.91         | [10]       |
| Acetaminophen         | None                         | −0.02           | NS                         | UGT1A1/1A9/2B15, SULT1A1/1A3/1E1/2A1, CYP1A2/2C9/2C19/2D6/2E1/3A4 (metabolism)                                          | 21                          | NA             | [11,12]    |
| Acipimox              | None                         | −1.08           | NS                         | Minimal metabolism                                                                                                      | NA                          | NA             | [13,14]    |
| Adinazolam            | Positive                     | −0.05           | NS                         | Hepatic metabolism                                                                                                      | 32.6                        | 9.24           | [15]       |

|                         |                              |       |       |                                                                                          |        |        |                 |
|-------------------------|------------------------------|-------|-------|------------------------------------------------------------------------------------------|--------|--------|-----------------|
| Afatinib                | Negative                     | 0.80  | 1.65  | P-gp/BCRP (GI efflux)                                                                    | −50    | −39    | [16–18]         |
| Albendazole             | Positive                     | 1.09  | 10.55 | CYP3A4 (metabolism), P-gp (GI efflux)                                                    | 550    | 840    | [19–21]         |
| Alectinib               | Positive                     | 2.06  | 24.86 | CYP3A4, aldehyde dehydrogenases (ADH) (metabolism), P-gp (GI efflux)                     | 164.12 | 188.42 | [22,23]         |
| Alitretinoin            | Positive                     | 1.53  | NS    | CYP3A4 (metabolism)                                                                      | 225.98 | 295.33 | [24]            |
| Alprazolam              | None                         | −0.91 | NS    | CYP3A4 (extensive metabolism)                                                            | 23     | NA     | [25,26]         |
| Amifampridine phosphate | Negative on C <sub>max</sub> | −3.30 | NS    | N-acetyl transferases (NAT2) (metabolism) (variability due to fast and slow acetylators) | −31.3  | −8.85  | [27–29]         |
| Amiodarone              | Positive                     | 2.70  | NS    | CYP3A4/2C8 (metabolism)                                                                  | 268.42 | 135.71 | [30,31]         |
| Amitriptyline           | None                         | 1.35  | NS    | UGTs, SULTs (metabolism)                                                                 | NA     | NA     | [32]            |
| Amlodipine              | None                         | 0.43  | 0.49  | CYP3A4 (metabolism), P-gp (GI efflux)                                                    | NA     | NA     | [33,34]         |
| Amocarzine              | Positive                     | 1.84  | NS    | Extensive hepatic metabolism                                                             | 170.21 | 204.55 | [35,36]         |
| Amoxycillin             | None                         | 0.32  | NS    | CYPs (metabolism)                                                                        | NA     | 5.2    | [37]            |
| Ampicillin              | Negative                     | 0.52  | 57.24 | MRP2 (GI efflux), PEPT1 (GI uptake), hydrolysis (metabolism)                             | −25.92 | −31.03 | [37,38]         |
| Apixaban                | None                         | −0.23 | 0.87  | P-gp (GI efflux) and CYP3A4 (metabolism)                                                 | 15     | 21     | [39,40]         |
| Aprepitant              | Positive                     | 1.79  | NS    | CYP3A4/1A2/2C19 (extensive metabolism)                                                   | 314.33 | 303.45 | [41,42]         |
| Artemisinin             | None                         | 0.20  | NS    | CYPs (metabolism)                                                                        | NA     | NA     | [43]            |
| Asciminib               | Negative                     | 0.88  | 13.34 | UGT2B7, CYP3A4 (metabolism), P-gp/BCRP (GI efflux)                                       | −71.23 | −63.55 | [44,45]         |
| Atazanavir              | Positive                     | 2.69  | 22.70 | CYP3A (extensive metabolism),                                                            | 57     | 70     | [46], FDA label |

|                     |                              |       |       |                                                                                       |        |        |                   |
|---------------------|------------------------------|-------|-------|---------------------------------------------------------------------------------------|--------|--------|-------------------|
|                     |                              |       |       | P-gp, MRP1 (GI efflux)                                                                |        |        |                   |
| Atenolol            | None                         | −0.03 | 15.02 | Minimal metabolism, P-gp (GI efflux)                                                  | NA     | 20     | [47]              |
| Atorvastatin        | Negative                     | 2.71  | 5.73  | P-gp (GI efflux) and CYP3A4 (metabolism)                                              | −47.83 | −12.67 | [48,49]           |
| Atovaquone          | Positive                     | 3.58  | 81.78 | CYP (metabolism), P-gp (GI efflux)                                                    | 400    | 200    | FDA label         |
| Bendroflumethiazide | None                         | −0.73 | NS    | Extensive metabolism                                                                  | NA     | NA     | [50,51]           |
| Bevantolol          | None                         | 1.47  | NS    | Extensive metabolism                                                                  | 12.6   | 7.47   | [52]              |
| Bidisomide          | Negative                     | 0.13  | NS    | NA                                                                                    | −52.97 | −49.04 | [53]              |
| Blonanserine        | Positive                     | −0.65 | 0.22  | P-gp (GI efflux), CYP3A4 (metabolism)                                                 | 242.32 | 283.63 | [54,55]           |
| BMS-690514          | Positive                     | 0.42  | NS    | CYPs, UGTs (metabolism)                                                               | 54.96  | 33     | [56,57]           |
| Boceprevir          | Positive on AUC              | 2.14  | 61.58 | Aldoketoreductase-mediated metabolic pathway, CYP3A4/5 (metabolism), P-gp (GI efflux) | NA     | 60     | [58]              |
| Bosentan            | None                         | 1.74  | 9.06  | CYP2C9/3A4 (metabolism), OATP2B1 (GI uptake)                                          | 22     | 10     | [59,60]           |
| Bosutinib           | Positive                     | 2.23  | 30.16 | P-gp (GI efflux), CYP3A4 (metabolism) [B:P =1.2]                                      | 80     | 70     | [61], FDA label   |
| Bromazepam          | Negative                     | 0.01  | NS    | CYPs (metabolism)                                                                     | −34.74 | −33.13 | 2273442, 30115648 |
| Bromfenac           | Negative on C <sub>max</sub> | 0.90  | 2.99  | OATP1B1, BCRP (GI efflux)                                                             | −72    | NA     | [62,63]           |
| Bromocriptine       | None                         | −0.46 | NS    | CYP3A/2D6/2C8/2C19 (extensive metabolism)                                             | 17.65  | 8.77   | [64,65]           |
| Bumetanide          | Negative on C <sub>max</sub> | −0.51 | 0.22  | UGTs (metabolism), OAT1, P-gp (GI efflux)                                             | −62.89 | −11.89 | [66,67]           |
| Buspirone           | Positive                     | −0.87 | NS    | CYP3A4 (extensive metabolism)                                                         | 116    | 84     | FDA label         |
| Cabozantinib        | Positive                     | 2.55  | 13.96 | CYP3A4 (extensive metabolism),                                                        | 48.13  | 66.14  | [68,69]           |

|                      |                              |       |       |                                                                                    |        |        |         |
|----------------------|------------------------------|-------|-------|------------------------------------------------------------------------------------|--------|--------|---------|
|                      |                              |       |       | MRP2 (GI efflux)                                                                   |        |        |         |
| Canagliflozin        | None                         | 2.43  | NS    | UGT1A9 and UGT2B4 (metabolism)                                                     | NA     | 7.88   | [68,70] |
| Candesartan          | Positive on C <sub>max</sub> | 0.63  | 0.73  | Intestinal ester hydrolysis, hepatic O-deethylation (metabolism), P-gp (GI efflux) | 26.6   | NA     | [71]    |
| Canertinib (CI-1033) | None                         | 1.81  | 20.58 | OATPs, BCRP (GI efflux)                                                            | NA     | NA     | [72]    |
| Cannabidiol          | Positive                     | 1.50  | NS    | CYP2C19/3A4 enzymes, and UGT1A7, UGT1A9, and UGT2B7 (metabolism)                   | 1400   | 384.9  | [73]    |
| Captopril            | Negative                     | −1.05 | 18.41 | Methyltransferase (metabolism), PEPT1 (GI uptake)                                  | −48.7  | −38.95 | [74]    |
| Carboxyamidotriazole | Positive                     | 2.75  | NS    | CYP3A4 (metabolism) [BA and                                                        | 212    | 166.09 | [75]    |
| Cediranib            | Negative on C <sub>max</sub> | 1.06  | 4.00  | UGT1A4 (major), FMO1, FMO3, CYPs (minor) (metabolism), P-gp (GI efflux)            | −31.74 | −19.73 | [76,77] |
| Cefpodoxime proxetil | None                         | 0.64  | NS    | Esterase (metabolism)                                                              | NA     | NA     | [78]    |
| Cefuroxime axetil    | Positive                     | 0.85  | 39.18 | Esterases (metabolism), PEPT1 (GI uptake)                                          | 42.85  | 44.97  | [79,80] |
| Celecoxib            | Positive                     | 1.62  | 5.51  | CYP2C9 (metabolism). P-gp (GI efflux)                                              | 29.28  | 11.49  | [81]    |
| Ceritinib            | Positive                     | 2.95  | 35.83 | CYP3A4 (metabolism), P-gp (GI efflux)                                              | 47.79  | 83.79  | [82,83] |
| Chloroquine          | Positive                     | 2.14  | 46.52 | CYP3A4 (metabolism), P-gp (GI efflux)                                              | 51.5   | 41.81  | [84,85] |
| Chlorothiazide       | Positive                     | 0.70  | 67.63 | BCRP (GI efflux), limited metabolism                                               | 25     | 25     | [86,87] |
| Cibenzoline          | None                         | 2.12  | NS    | CYP3A/2D6 (metabolism)                                                             | 16     | NA     | [88]    |
| Cilazapril           | Negative                     | −1.72 | 0.48  | Hydrolysis (metabolism), PEPT1 (GI                                                 | −28.9  | −13.82 | [89,90] |

|               |                              |       |       |                                                                                |        |        |                  |
|---------------|------------------------------|-------|-------|--------------------------------------------------------------------------------|--------|--------|------------------|
|               |                              |       |       | uptake), P-gp (GI efflux)                                                      |        |        |                  |
| Cilostazol    | Positive                     | 1.09  | 10.83 | CYP3A4/2C19 (metabolism), OATP1B1-, and OATP1B3, MRP2, BCRP, P-gp (GI efflux)  | 94.56  | 25.51  | [91,92]          |
| Cinnarizine   | Positive                     | 1.76  | NS    | Extensive hepatic metabolism                                                   | 28.26  | 57.14  | [93]             |
| Ciprofloxacin | Negative on C <sub>max</sub> | 0.17  | 60.36 | CYP1A2 (metabolism), BCRP (GI efflux)                                          | −33    | NA     | [94,95]          |
| Ciramadol     | None                         | −1.17 | NS    | UGTs (metabolism)                                                              | 18.8   | 3.81   | [96]             |
| Clodronate    | Negative                     | −0.81 | NS    | No metabolism                                                                  | −77.8  | −90.2  | [97,98]          |
| Clopidogrel   | Positive                     | 1.41  | 9.32  | Esterase, CYPs (metabolism), P-gp (GI efflux)                                  | 515.6  | 869.67 | [99,100]         |
| Clozapine     | None                         | −0.57 | 1.53  | CYP1A2, 2C, 2D6, 2E1 and 3A3/4 (extensive metabolism), OATPs, P-gp (GI efflux) | 20     | 8.05   | [101,102]        |
| Cobicistat    | None                         | 2.68  | 7.73  | CYP3A, 2D6 (metabolism), OCT2, P-gp (GI efflux)                                | NA     | 6.88   | [103]            |
| Cobimetinib   | None                         | 0.28  | 1.51  | CYP3A, UGT2B7 (metabolism), P-gp (GI efflux)                                   | 7.5    | 10     | [104,105]        |
| Codeine       | None                         | −0.38 | NS    | UGT2B7/2B4, CYP3A4/2D6 (metabolism), OCT1                                      | NA     | NA     | [106,107]        |
| Crizotinib    | None                         | 2.21  | 22.21 | P-gp (GI efflux) and CYP3A4 (metabolism)                                       | 14.07  | 14.27  | [108], FDA label |
| Cyclandelate  | Positive                     | 0.60  | NS    | Metabolism                                                                     | 25     | 25     | [109]            |
| Cyclosporine  | Positive                     | 1.45  | NS    | CYPs (metabolism)                                                              | 25     | 25     | [110]            |
| Dabrafenib    | Negative                     | 2.26  | 11.55 | CYP2C8, CYP3A4 (metabolism), P-gp, BCRP (GI efflux)                            | −50.64 | −30.08 | [111,112]        |
| Danazol       | Positive                     | 1.36  | NS    | CYP3A4 (metabolism)                                                            | 140    | 290.83 | [113,114]        |
| Darunavir     | Positive                     | 1.68  | NS    | CYP3A4 (metabolism)                                                            | 62.11  | 38.57  | [115]            |

|                        |                                 |       |       |                                                                                |        |        |                         |
|------------------------|---------------------------------|-------|-------|--------------------------------------------------------------------------------|--------|--------|-------------------------|
| Deferasirox            | Positive                        | 2.21  | NS    | UGT1A1/1A3,<br>CYPs<br>(metabolism)                                            | 43.55  | 31.05  | [116,117]               |
| Deflazacort            | None                            | 0.92  | 3.26  | Esterase<br>(metabolism),<br>P-gp (GI efflux)                                  | 17.02  | 0.78   | [118,119], FDA<br>label |
| Deramciclane           | Positive on<br>AUC              | 2.07  | NS    | CYP2E1<br>(Extensive<br>metabolism)                                            | 24     | 31     | [120]                   |
| Desloratadine          | None                            | 0.88  | 0.97  | UGT2B10, CYP2<br>C8<br>(metabolism),<br>P-gp (GI efflux)                       | NA     | NA     | [121,122]               |
| Desmopressin           | Negative                        | −2.14 | NS    | Intestinal<br>degradation                                                      | −45.91 | −40.54 | [123,124]               |
| Dextropropoxy<br>phene | None                            | 1.79  | NS    | CYP3A4<br>(metabolism)                                                         | NA     | NA     | [107,125]               |
| Diclofenac             | Negative on<br>C <sub>max</sub> | 1.65  | 6.75  | CYP2C9<br>(metabolism),<br>OATP1B3,<br>P-gp/BCRP (GI<br>efflux)                | −61    | −15    | [126]                   |
| Dicoumarol             | Positive on<br>AUC              | 1.18  | NS    | CYP2C<br>(metabolism)                                                          | NA     | 242    | [127]                   |
| Didanosine             | Negative                        | −0.64 | 63.50 | BCRP (GI<br>efflux), Purine<br>nucleoside<br>phosphorylase<br>(PNP)            | −53.71 | −46.61 | [128,129]               |
| Digoxin                | Negative                        | −1.60 | 0.04  | P-gp (GI efflux)                                                               | −25    | −25    | [130]                   |
| Diprafenone            | Positive on<br>AUC              | 0.82  | NS    | CYP2D6<br>(metabolism)                                                         | 8.78   | 36.16  | [131,132]               |
| Dixyrazine             | Positive                        | 0.49  | NS    | Degradation                                                                    | 25     | 25     | [133,134]               |
| Dolutegravir           | Positive                        | 0.34  | 4.77  | UGT1A1,<br>UGT1A3,<br>UGT1A9<br>(metabolism),<br>BCRP, and<br>P-gp (GI efflux) | 36.89  | 48.27  | [135,136]               |
| Doravirine             | None                            | 2.10  | NS    | CYP3A4/5<br>(metabolism)                                                       | 15.53  | 17.94  | [137,138]               |
| Dovitinib              | None                            | 1.16  | NS    | CYP1A1/2,<br>flavin-containing<br>monooxygenase<br>(FMO)<br>(metabolism)       | 5.89   | 8.8    | [139,140]               |
| Doxycycline            | None                            | 0.10  | 18.00 | CYPs<br>(metabolism),<br>P-gp (GI efflux)                                      | 20     | NA     | [141–143]               |
| Dronedarone            | Positive                        | 2.90  | 28.74 | CYP3A4<br>(metabolism),<br>P-gp (GI efflux)                                    | 25     | 25     | [144]                   |
| Duloxetine             | Positive on C <sub>max</sub>    | 1.91  | NS    | CYPs 1A2, 2D6<br>(extensive<br>metabolism)                                     | 31.33  | 4.24   | [145,146]               |

|                 |                              |       |        |                                                                                              |        |        |                  |
|-----------------|------------------------------|-------|--------|----------------------------------------------------------------------------------------------|--------|--------|------------------|
| Efavirenz       | None                         | 2.45  | 76.03  | CYP2B6 (metabolism), BCRP (GI efflux)                                                        | 16.81  | 13.58  | [147,148]        |
| Eltrombopag     | Negative                     | 1.30  | 4.52   | UGT1A1, UGT1A3, CYP1A2, CYP2C8 (metabolism), BCRP (GI efflux), OATP1B1                       | −64.71 | −59.36 | [149,150]        |
| Elvitegravir    | Positive                     | 1.96  | NS     | CYP3A4, UGT1A1/3 (metabolism)                                                                | 56     | 87     | [58,151]         |
| Enoxacin        | None                         | 0.17  | NS     | CYPs (metabolism), MATE-1                                                                    | 9.6    | 8.6    | [151,152]        |
| Entecavir       | Negative on C <sub>max</sub> | −3.22 | 0.14   | BCRP (GI efflux)                                                                             | −62.97 | −22.36 | [153,154]        |
| Eprosartan      | Negative on C <sub>max</sub> | 2.14  | 23.05  | OATP1B1 and MRP2 (GI efflux)                                                                 | −25.25 | −14    | [155]            |
| Erlotinib       | Positive                     | 1.83  | 15.25  | BCRP (GI efflux)                                                                             | 57.16  | 100.25 | [156,157]        |
| Erythromycin    | Negative                     | 0.64  | 27.25  | CYP3A4 (metabolism), P-gp (GI efflux)                                                        | −53.78 | −56.45 | [158,159]        |
| Eslicarbazepine | None                         | 0.76  | 107.99 | Hydrolysis (metabolism), P-gp (GI efflux)                                                    | NA     | NA     | [160–162]        |
| Estramustine    | Negative                     | 3.65  | 38.15  | CYPs (metabolism), P-gp (GI efflux)                                                          | −72.68 | −71.07 | [163]            |
| Ethionamide     | None                         | 0.38  | NS     | EthA enzyme (metabolism)                                                                     | NA     | NA     | [164,165]        |
| Etoposide       | None                         | −0.39 | 6.80   | CYP3A4/5 (metabolism), P-gp (GI efflux)                                                      | 22     | 12.25  | [166,167]        |
| Etoricoxib      | Negative on C <sub>max</sub> | 2.17  | NS     | CYPs (metabolism), MRP4                                                                      | −35.8  | −2.88  | [168,169]        |
| Evacetrapib     | Positive                     | 2.21  | NS     | CYP3A/CYP2C8 (metabolism)                                                                    | 51.05  | 44.29  | [170,171]        |
| Everolimus      | Negative on C <sub>max</sub> | 0.69  | 0.08   | P-gp (GI efflux) and CYP3A4 (metabolism)                                                     | −60.34 | −20.49 | [172,173]        |
| Fedratinib      | Positive on AUC              | 2.32  | 38.12  | CYP3A4, CYP2C19, and flavin-containing monooxygenase 3 (FMO3) (metabolism), P-gp (GI efflux) | 3.57   | 30.73  | [174], FDA label |

|                             |                 |       |        |                                                                           |        |        |                   |
|-----------------------------|-----------------|-------|--------|---------------------------------------------------------------------------|--------|--------|-------------------|
| Fenofibrate                 | Positive        | 3.15  | NS     | Esterase, UGTs, CYPs (metabolism)                                         | 282.84 | 234    | [175,176]         |
| Fenoldopam                  | Negative        | 0.17  | NS     | Glucuronidation, sulfation, and methylation (metabolism)                  | −79.94 | −63.25 | [177,178]         |
| Fexinidazole                | Positive        | 1.71  | NS     | CYP1A2, 2B6, 2C19, 3A4, and 3A5 and, to a lesser extent, 2D6 (metabolism) | 291.6  | 247    | [179]             |
| Fiduxosin                   | Positive        | 1.78  | NS     | NA                                                                        | 337.32 | 136.01 | [180,181]         |
| Flecainide                  | None            | 1.39  | 19.31  | CYP3A4/2D6 (metabolism), P-gp (GI efflux)                                 | 4.11   | 13.08  | [182]             |
| Flubendazole                | Positive        | 1.78  | NS     | Metabolism                                                                | 25     | 25     | [183]             |
| Fluconazole                 | None            | −0.54 | 13.06  | CYP3A4 (metabolism), P-gp (GI efflux)                                     | 5.12   | 6.19   | [184]             |
| Fluvoxamine                 | None            | 1.44  | 4.60   | CYPs (metabolism), P-gp (GI efflux)                                       | NA     | −7     | [185,186]         |
| Fosamprenavir (prodrug)     | Negative        | 0.61  | 47.81  | CYP3A4 (metabolism), P-gp (GI efflux)                                     | −28    | −46    | [187]             |
| Fosaprepitant               | Positive        | 2.02  | NS     | CYP3A4 with minor metabolism by CYP1A2 and CYP2C19 (metabolism)           | 33     | 47     | [188], EMEA label |
| Fostamatinib (R406 prodrug) | None            | 0.59  | 3.45   | CYP3A4, UGT1A9 (metabolism), P-gp (GI efflux)                             | NA     | NA     | [189,190]         |
| Furosemide                  | Negative        | 0.12  | 4.84   | P-gp/BCRP (GI efflux), OATP2B1 (GI uptake)                                | −44    | −33    | [66]              |
| Gabapentin                  | Positive        | −1.62 | 140.16 | LAT1/2 (GI uptake)                                                        | 32     | 26     | [191–193]         |
| Ganciclovir                 | None            | −0.46 | 156.72 | Minimal metabolism, P-gp (GI efflux)                                      | 12.94  | 19.14  | [194]             |
| Gatifloxacin                | None            | 0.40  | 42.62  | P-gp (GI efflux)                                                          | 8.57   | 7.01   | [195]             |
| Gefitinib                   | None            | 1.57  | 22.38  | CYP3A4/3A5/2D6 (metabolism), P-gp, BCRP (GI efflux)                       | NA     | NA     | [196], monograph  |
| Gemifloxacin                | None            | 0.78  | 32.87  | P-gp, MRP2 (GI efflux)                                                    | 14     | 12     | [197,198]         |
| Gepirone                    | Positive on AUC | −1.13 | NS     | CYP3A4 and CYP2D6 (metabolism)                                            | −9.34  | 36.97  | [199]             |



|                          |                              |       |       |                                                                                 |        |        |                      |
|--------------------------|------------------------------|-------|-------|---------------------------------------------------------------------------------|--------|--------|----------------------|
| Ginkgolide A             | Positive                     | −0.48 | NS    | CYPs (metabolism)                                                               | 118.11 | 85.64  | [200,201]            |
| Glasdegib                | Negative on C <sub>max</sub> | 0.93  | 10.68 | P-gp (GI efflux) and CYP3A4 (metabolism)                                        | −25.68 | −10.96 | [202,203]            |
| Glyburide                | None                         | 0.99  | 0.40  | CYP3A4/2C9/2C19/3A7/3A5 (metabolism), P-gp, BCRP (GI efflux), MRP1              | 11.03  | 12.34  | [204]                |
| Griseofulvin             | Positive                     | 1.60  | NS    | Desmethylation, UGTs (metabolism)                                               | 25     | 25     | [205,206]            |
| GW420867X                | None                         | 0.52  | 6.71  | CYPs (metabolism), P-gp (GI efflux)                                             | NA     | NA     | [207]                |
| Halofantrine             | Positive                     | 3.95  | 19.98 | CYP3A4 (metabolism), P-gp (GI efflux)                                           | 561.95 | 189.74 | [208,209]            |
| Hydralazine              | Positive                     | −1.12 | NS    | Extensive–first pass metabolism by acetylation                                  | 143.67 | 254    | [210,211]            |
| Hydrocodone              | Positive on C <sub>max</sub> | −0.35 | NS    | CYP3A4, 2D6 (metabolism)                                                        | 42.07  | 11.18  | [212–214]            |
| Ibrutinib                | Positive                     | 1.92  | 38.14 | CYP3A, and to a minor extent by CYP2D6 (extensive metabolism), P-gp (GI efflux) | 281.82 | 158.9  | [215,216], FDA label |
| Icotinib                 | Positive                     | 2.10  | NS    | CYP3A4, CYP3A5, and CYP1A2 (metabolism)                                         | 59     | 79     | [217,218]            |
| Imipramine               | None                         | 0.48  | 7.13  | CYP2C19/1A2/3A4 (extensive metabolism), P-gp (GI efflux)                        | NA     | NA     | [219,220]            |
| Imiquimod                | None                         | 0.21  | NS    | NA                                                                              | NA     | NA     | [221,222]            |
| Indinavir                | Negative                     | 1.51  | 26.07 | CYP3A4 (metabolism), P-gp (GI efflux)                                           | −86    | −78    | [223,224]            |
| Indomethacin             | Negative on C <sub>max</sub> | 1.62  | 2.79  | CYP2C9, 2C19, 2D6 (metabolism), P-gp (GI efflux)                                | −29    | 1.5    | [225,226]            |
| Ipriflavone              | Positive                     | 1.66  | NS    | Extensive metabolism                                                            | 25     | 25     | [227]                |
| Isoniazid                | Negative on C <sub>max</sub> | −1.46 | NS    | NAT2, CYP2E1 (metabolism)                                                       | −56.04 | −11.94 | [228]                |
| Isosorbide–5–mononitrate | None                         | −2.55 | NS    | Hepatic metabolism                                                              | −20    | 16.45  | [229,230]            |
| Isotretinoin             | Positive                     | 1.83  | NS    | 2C8, 2C9, 3A4, and 2B6 (metabolism)                                             | 144.44 | 86.03  | [231]                |

|                         |                              |       |        |                                                                       |        |        |                  |
|-------------------------|------------------------------|-------|--------|-----------------------------------------------------------------------|--------|--------|------------------|
| Itraconazole            | Positive                     | 1.62  | NS     | CYP3A4 (metabolism)                                                   | 109    | 69.75  | [232,233]        |
| Ivermectin              | Positive                     | 1.78  | NS     | Extensive metabolism                                                  | 207.19 | 164.72 | [234,235]        |
| Ixazomib                | Negative                     | −0.05 | 0.44   | CYPs (metabolism), P-gp (GI efflux)                                   | −70.39 | −32.04 | [236–238]        |
| Ketoconazole            | Negative                     | 1.90  | 15.05  | CYP3A4 (metabolism), P-gp (GI efflux)                                 | −43.21 | −39.15 | [239]            |
| Labetalol               | None                         | 2.14  | 21.92  | UGTs (metabolism), P-gp (GI efflux)                                   | −21.64 | 19.29  | [240]            |
| Lacosamide              | None                         | 0.24  | 31.96  | CYP2C9, CY2C19, and CYP3A4 (metabolism), P-gp (GI efflux)             | NA     | NA     | [241]            |
| Lanopepden (GSK1322322) | Positive on AUC              | 1.12  | NS     | UGTs (metabolism)                                                     | NA     | 27.22  | [242]            |
| Lapatinib               | Positive                     | 2.43  | 103.26 | CYP3A4 and CYP3A5 (extensive metabolism), P-gp, BCRP (GI efflux)      | 203    | 325    | [243,244]        |
| Lenalidomide            | Negative on C <sub>max</sub> | −1.07 | 7.71   | P-gp (GI efflux), minimal metabolism                                  | −50    | −20    | [245]            |
| Lenvatinib              | None                         | 0.81  | 0.94   | CYP3A and aldehyde oxidase (metabolism), P-gp, BCRP (GI efflux)       | −5     | 6      | [246], FDA label |
| Lesinurad               | None                         | 2.31  | 39.57  | CYP2C9 (metabolism), BCRP (GI efflux)                                 | 16.19  | 10.35  | [247,248]        |
| Lesogaberan             | None                         | −2.52 | NS     | Hepatic metabolism                                                    | 24     | NA     | [249,250]        |
| Levetiracetam           | None                         | −1.87 | 235.01 | Enzymatic hydrolysis and hydroxylation (metabolism), P-gp (GI efflux) | NA     | NA     | [251]            |
| Levofloxacin            | None                         | −0.08 | 33.21  | Limited metabolism, OATP1A2 (GI uptake), BCRP (GI efflux)             | 13.55  | 9.7    | [252–254]        |
| Linezolid               | None                         | 0.02  | 44.46  | P-gp (GI efflux) and CYP3A4 (metabolism)                              | 18.42  | 3.29   | [255,256]        |

|              |                              |       |       |                                                                                                                     |        |        |                  |
|--------------|------------------------------|-------|-------|---------------------------------------------------------------------------------------------------------------------|--------|--------|------------------|
| Linifanib    | Negative on C <sub>max</sub> | −0.11 | 2.05  | CYP3A4 (metabolism), P-gp (GI efflux)                                                                               | −37.11 | −15.16 | [255,257]        |
| Lisinopril   | None                         | −0.43 | 1.97  | Limited metabolism, P-gp (GI efflux)                                                                                | NA     | NA     | [258,259]        |
| Lonafarnib   | Negative on C <sub>max</sub> | 2.68  | NS    | CYP3A4, CYP3A5, CYP2C8 (extensive metabolism)                                                                       | −52    | −23    | [260,261]        |
| Lopinavir    | Positive on AUC              | 2.92  | 25.44 | P-gp, MRP2 (GI efflux), CYP3A4 (metabolism)                                                                         | 18     | 27     | [262,263]        |
| Loratadine   | Positive                     | 0.47  | 1.04  | CYP3A4 (metabolism), P-gp (GI efflux)                                                                               | 52.87  | 75.77  | [264,265]        |
| Losartan     | None                         | 1.93  | 9.46  | CYPs (metabolism), P-gp (GI efflux)                                                                                 | −16.16 | 14.83  | [266]            |
| Lumefantrine | Positive on C <sub>max</sub> | 4.19  | 9.07  | CYP3A4 (extensive metabolism), P-gp (GI efflux)                                                                     | 100    | NA     | [267]            |
| Lurasidone   | Positive                     | 1.01  | NS    | CYP3A4 (extensive metabolism)                                                                                       | 97     | 103.25 | [268,269]        |
| Manidipine   | Positive                     | 1.91  | NS    | CYP3A4 (extensive metabolism)                                                                                       | 25.81  | 42.4   | [270,271]        |
| Maraviroc    | Negative                     | 1.05  | 2.34  | P-gp (GI efflux) and CYP3A4 (metabolism)                                                                            | −33    | −33    | [272], FDA label |
| Mavoglurant  | Positive                     | 1.21  | NS    | CYP2C8, CYP2C9, CYP2C19 with minor to negligible contributions of CYP2D6, CYP3A4, and CYP1A1 (extensive metabolism) | 25     | 25     | [273]            |
| Mebendazole  | Positive                     | 2.19  | NS    | Extensive metabolism                                                                                                | 25     | 25     | [274,275]        |
| Mefloquine   | Positive                     | 1.90  | 79.30 | CYP3A4 (metabolism), P-gp (GI efflux)                                                                               | 72.8   | 39.91  | [276]            |
| Megestrol    | Positive                     | 2.28  | NS    | CYP3A4, UGT2B17 (metabolism)                                                                                        | 629.41 | 139    | [277,278]        |
| Melphalan    | Negative                     | −0.95 | NS    | Hydrolysis to mono and dihydroxy                                                                                    | −42.2  | −31.8  | [279]            |

|                           |                                 |       |       | products<br>(metabolism)                                                                      |        |        |                      |
|---------------------------|---------------------------------|-------|-------|-----------------------------------------------------------------------------------------------|--------|--------|----------------------|
| Menatetrenone<br>(Vit K2) | Positive                        | 2.09  | NS    | NA                                                                                            | 25     | 25     | [280]                |
| Metformin                 | None                            | 0.16  | NS    | OCTs, MATEs<br>(mainly renal)                                                                 | 15.55  | 3.79   | [281,282]            |
| Methotrexate              | None                            | −0.76 | 0.66  | BCRP (GI<br>efflux)                                                                           | 19.31  | NA     | [283]                |
| Methylphenidate           | None                            | −0.06 | 6.86  | CES1A1<br>(metabolism),<br>P-gp (GI efflux)<br>(variability due<br>to d and l<br>enantiomers) | 22.75  | 15.42  | [284,285]            |
| Metoclopramide            | None                            | −0.41 | 4.00  | CYP2D6/3A/1A<br>2 (metabolism),<br>P-gp and BCRP<br>(GI efflux)                               | NA     | NA     | [286,287]            |
| Metoprolol                | Positive                        | 0.00  | NS    | CYP2D6<br>(extensive<br>metabolism)                                                           | 123.53 | 132    | [288,289]            |
| Migalastat                | Negative                        | −3.11 | NS    | O-glucuronidation<br>(metabolism),<br>SGLT-1 (minor)                                          | −40.93 | −37.93 | [290,291]            |
| Mirabegron                | Negative                        | 1.69  | 58.72 | P-gp (GI<br>efflux),<br>OATP1A2 (GI<br>uptake) and<br>CYP<br>(metabolism)                     | −72.84 | −47.73 | [292,293]            |
| Mirtazapine               | None                            | −1.26 | NS    | CYP1A2,<br>CYP2D6,<br>CYP3A4<br>(metabolism)                                                  | 5.26   | 12.5   | [294,295]            |
| MMI270B                   | Negative on<br>C <sub>max</sub> | 0.05  | NS    | Metabolism                                                                                    | −55.5  | −17.34 | [296]                |
| Momelotinib               | None                            | 1.39  | 19.30 | CYPs<br>(metabolism),<br>Pgp, BCRP (GI<br>efflux)                                             | 24.17  | 22.44  | [297,298]            |
| Nadolol                   | Negative on<br>C <sub>max</sub> | −0.85 | 10.34 | Renal excretion<br>mainly, P-gp<br>(GI efflux)                                                | −34.4  | −23.76 | [299,300]            |
| Nalidixic acid            | Positive                        | −0.36 | NS    | CYPs, UGTs<br>(metabolism)                                                                    | 91.3   | 87.78  | [301,302]            |
| Naloxegol                 | Positive                        | 0.25  | 1.53  | P-gp (GI<br>efflux), CYP3A4<br>(metabolism)                                                   | 30     | 45     | [303], EMEA<br>label |
| Nateglinide               | Negative on<br>C <sub>max</sub> | 1.45  | NS    | CYP2C9,<br>CYP3A<br>(metabolism),<br>OATs,<br>Monocarboxylate<br>transporter<br>(MCT) 6       | −33.66 | −5.63  | [304,305]            |

|                                               |                              |       |       |                                                  |        |        |                      |
|-----------------------------------------------|------------------------------|-------|-------|--------------------------------------------------|--------|--------|----------------------|
| Nelfinavir                                    | Positive                     | 3.42  | NS    | CYP2C19 and CYP3A (metabolism)                   | 420    | 230    | [306], FDA label     |
| Nifedipine                                    | None                         | 1.13  | 6.93  | CYP3A4 (metabolism), BCRP (GI efflux)            | 22.85  | 9.32   | [307,308]            |
| Niflumic acid (given as talniflumate–Prodrug) | Positive                     | 1.53  | NS    | UGTs (metabolism)                                | 417.41 | 386.38 | [309]                |
| Nilotinib                                     | Positive                     | 2.90  | 30.22 | CYP3A4 (metabolism), P-gp/BCRP (GI efflux)       | 112    | 82     | [310]                |
| Nilvadipine                                   | None                         | 0.29  | NS    | Extensive first pass metabolism                  | NA     | NA     | [311,312]            |
| Nitrofurantoin                                | Positive                     | −0.02 | 16.80 | Extensive metabolism, BCRP (GI efflux)           | 25     | 25     | [313]                |
| Norfloxacin                                   | None                         | 0.20  | 50.10 | CYP1A2 (limited metabolism), BCRP (GI efflux)    | NA     | NA     | [314,315]            |
| Omadacycline                                  | Negative                     | 0.75  | 20.20 | P-gp (GI efflux)                                 | −50    | −61.11 | [316,317]            |
| Orteronel                                     | Negative                     | 1.17  | 52.07 | P-gp, BCRP (GI efflux), CYP (minor) (metabolism) | −50.62 | −40.18 | [318], FDA monograph |
| Ospemifene                                    | Positive                     | 2.66  | NS    | CYP3A4, CYP2C9, CYP2C19, and CYP2B6 (metabolism) | 260    | 180    | [319]                |
| Oxaprozin                                     | None                         | 2.17  | NS    | CYPs, UGTs (metabolism)                          | NA     | NA     | [320,321]            |
| Oxfendazole                                   | Positive                     | 0.56  | NS    | Extensive metabolism                             | 238.46 | 673.86 | [322–324]            |
| Oxybutynin                                    | Positive on C <sub>max</sub> | 0.60  | 1.12  | CYP3A4 (extensive metabolism), P-gp (GI efflux)  | 121.43 | 6.06   | [325–327]            |
| Palbociclib                                   | Positive on C <sub>max</sub> | 1.46  | NS    | CYP3A, SULT2A1 (metabolism)                      | 36.84  | 18.75  | [328,329]            |
| Panobinostat                                  | Negative on C <sub>max</sub> | 1.98  | 2.29  | P-gp (GI efflux) and CYP3A4 (metabolism)         | −47.82 | −18.18 | [330,331], FDA label |
| Penicillin                                    | Negative                     | 0.55  | 29.90 | PEPT1 (GI uptake)                                | −25    | −25    | [332]                |
| Pexmetinib                                    | Positive on C <sub>max</sub> | 4.51  | NS    | NA                                               | 49.04  | 20.51  | [333]                |

|                                      |                                 |       |       |                                                                                                                         |        |        |                         |
|--------------------------------------|---------------------------------|-------|-------|-------------------------------------------------------------------------------------------------------------------------|--------|--------|-------------------------|
| PF-04449913<br>(Glasdegib maleate B) | None                            | 0.93  | 10.68 | CYP3A4/5<br>(metabolism),<br>P-gp, BCRP (GI<br>efflux)                                                                  | 16.56  | 18.66  | [334]                   |
| Phenytoin                            | Positive                        | 1.23  | NS    | CYPs<br>(metabolism)                                                                                                    | 45.45  | 109    | [335,336]               |
| Pictilisib<br>(GDC-0941)             | None                            | 0.38  | 3.12  | P-gp and BCRP<br>(GI efflux)                                                                                            | −23.08 | 17.6   | [337]                   |
| Piperaquine                          | Positive                        | 2.49  | NS    | CYP3A4<br>(metabolism)                                                                                                  | 217    | 172.66 | [338]                   |
| Pitavastatin                         | Negative on<br>C <sub>max</sub> | 0.61  | 0.38  | UGT1A3,<br>UGT2B7,<br>CYP2C9,<br>CYP2C8<br>(metabolism),<br>P-gp/MRP2/BC<br>RP (GI efflux),<br>OATP1B1/1B3/2<br>B1/NTCP | −43.1  | −11    | [339], FDA label        |
| Pleconaril                           | Positive                        | 1.56  | NS    | Extensive<br>metabolism                                                                                                 | 147.83 | 122.55 | [340,341]               |
| Ponatinib                            | None                            | 1.79  | 3.38  | CYP3A<br>(metabolism),<br>P-gp, BCRP (GI<br>efflux)                                                                     | NA     | NA     | [342,343], FDA<br>label |
| Posaconazole                         | Positive                        | 1.82  | 11.42 | UGTs<br>(metabolism),<br>P-gp (GI efflux)                                                                               | 287.88 | 290.8  | [344–346]               |
| Pradigastat                          | Positive                        | 2.20  | NS    | NA                                                                                                                      | 36.02  | 30.87  | [347,348]               |
| Prazosin                             | None                            | −2.24 | 0.10  | CYPs<br>(metabolism),<br>BCRP (GI<br>efflux)                                                                            | NA     | NA     | [107]                   |
| Pregabalin                           | Negative on<br>C <sub>max</sub> | −1.73 | 37.68 | LAT1/2 (GI<br>uptake)                                                                                                   | −25    | NA     | [192]                   |
| Preladenant                          | Negative on<br>C <sub>max</sub> | −0.34 | NS    | O-desmethy lati<br>on,<br>carboxylation<br>(metabolism)                                                                 | −38.16 | −4.47  | [349,350]               |
| Pretomanid (PA<br>824)               | Positive                        | 1.23  | NS    | CYP3A4<br>(metabolism)                                                                                                  | 38.01  | 43.23  | [351]                   |
| Primaquine                           | Positive on C <sub>max</sub>    | 0.33  | NS    | CYP2D6, UGTs<br>(Extensive<br>metabolism)                                                                               | 26     | 14     | [352–354]               |
| Procainamide                         | None                            | 0.00  | NS    | OCT3, CYP2D6<br>(metabolism)                                                                                            | NA     | NA     | [355]                   |
| Propafenone                          | Positive on C <sub>max</sub>    | 2.20  | NS    | CYP2D6<br>(Extensive<br>metabolism)                                                                                     | 50.31  | 7.37   | [356,357]               |
| Propranolol                          | Positive                        | 0.61  | NS    | CYP2D6, 1A2,<br>and 2C19<br>(metabolism)                                                                                | 87.5   | 127.13 | [288]                   |
| Pseudoephedri<br>ne                  | None                            | −0.93 | NS    | Extensive<br>hepatic<br>metabolism                                                                                      | 7.31   | −1.57  | [358,359]               |

|                                            |                                 |       |       |                                                                                                       |        |        |                         |
|--------------------------------------------|---------------------------------|-------|-------|-------------------------------------------------------------------------------------------------------|--------|--------|-------------------------|
| R1663                                      | None                            | 1.90  | NS    | CYP3A4<br>(extensive<br>metabolism)                                                                   | NA     | NA     | [360]                   |
| Raltegravir                                | Positive                        | 0.31  | NS    | UGTs<br>(metabolism),<br>OAT1                                                                         | 96.31  | 112    | [361,362]               |
| Ravuconazole                               | Positive                        | −0.60 | NS    | NA                                                                                                    | 25     | 25     | [363]                   |
| Repirinast                                 | Positive on C <sub>max</sub>    | 2.48  | NS    | NA                                                                                                    | 220    | NA     | [364]                   |
| Ribavirine                                 | Positive                        | −1.62 | 32.76 | CNT2 and<br>ENT1 (GI<br>uptake),                                                                      | 66     | 42     | [365], FDA label        |
| Riboflavin<br>(Vitamin B2)                 | Positive                        | −2.61 | 0.04  | hRFT-1,<br>hRFT-2 and<br>hRFT-3 (GI<br>uptake)                                                        | 25     | 25     | [366,367]               |
| Rifabutin                                  | None                            | 1.55  | NS    | Hepatic<br>metabolism                                                                                 | 16.87  | NA     | [368]                   |
| Rifalazil                                  | Positive                        | 0.94  | NS    | Esterase,<br>CYP3A4<br>(metabolism)                                                                   | 101.22 | 44.66  | [369]                   |
| Rifampicin                                 | Negative on<br>C <sub>max</sub> | 1.76  | NS    | Desacetylation<br>(metabolism),<br>Degradation,<br>ET (P-gp)                                          | −35.77 | −6.4   | [370,371]               |
| Rilpivirine                                | Positive                        | 1.41  | NS    | CYP3A<br>(metabolism)                                                                                 | 74.12  | 65.97  | [372,373], FDA<br>label |
| Riociguat                                  | Negative on<br>C <sub>max</sub> | −0.83 | 0.24  | CYP1A1, 2J2,<br>3A4 and 3A5,<br>UGT1A1,<br>UGT1A9<br>(metabolism),<br>P-gp, BCRP (GI<br>efflux), OCT2 | −34.91 | −11.63 | [374]                   |
| Ritonavir                                  | Negative on<br>C <sub>max</sub> | 2.50  | 5.55  | P-gp (GI efflux)<br>and CYP3A4<br>(metabolism)                                                        | −26.67 | −23.4  | [375–377]               |
| Rivaroxaban                                | Positive                        | 0.90  | 1.84  | CYP3A4/5,<br>CYP2J2<br>(metabolism),<br>P-gp, BCRP (GI<br>efflux)                                     | 25     | 25     | [378,379]               |
| Rosuvastatin                               | Negative                        | −0.40 | 0.83  | BCRP (GI<br>efflux)                                                                                   | −31.03 | −37.16 | [380]                   |
| Rufinamide                                 | Positive                        | 0.57  | NS    | CES<br>(metabolism)                                                                                   | 95.89  | 42.83  | [381,382]               |
| Rupatadine                                 | None                            | 1.17  | NS    | CYP3A4/2C9/2<br>C19/2D6 (High<br>first pass<br>metabolism)                                            | −5.9   | 23.03  | [383]                   |
| Sacubitril<br>(Prodrug)                    | Negative on<br>C <sub>max</sub> | 2.93  | 19.44 | UGT2B17, CES1<br>(metabolism),<br>P-gp (GI efflux)                                                    | −73.12 | −21    | [384,385]               |
| Sacubitrilat<br>(sacubitril<br>metabolite) | Negative on<br>C <sub>max</sub> | 2.35  | 20.87 | OATP1B1 and<br>OATP1B3, P-gp<br>(GI efflux)                                                           | −27.13 | −7.89  | [384,385]               |

|                          |                              |       |       |                                                                                            |        |        |                  |
|--------------------------|------------------------------|-------|-------|--------------------------------------------------------------------------------------------|--------|--------|------------------|
| Safinamide               | None                         | 1.31  | 6.62  | Cytosolic amidases, MAO-A, ALDH, CYP3A4 (metabolism), OAT3, BCRP (GI efflux)               | NA     | NA     | [386]            |
| Sapropterin              | Positive                     | −0.86 | 11.61 | P-gp (GI efflux), CYP3A4, and CYP2D1 (metabolism)                                          | 25     | 34.52  | [387]            |
| Saquinavir               | Positive on AUC              | 2.99  | 35.78 | CYP3A4 (metabolism), P-gp, MRP1/2 (GI efflux)                                              | NA     | 570.83 | [388]            |
| Saroglitazar             | Negative on C <sub>max</sub> | 1.03  | 0.36  | P-gp (GI efflux) and CYP3A4 (metabolism)                                                   | −33.46 | −3.82  | [389,390]        |
| Selegiline Hydrochloride | Positive                     | 0.20  | NS    | CYP2B6 and CYP3A4, 2A6 (metabolism)                                                        | 228.13 | 305.36 | [391,392]        |
| Selexipag (ACT-333679)   | Negative on C <sub>max</sub> | −0.43 | 0.03  | CES1, CYP2C8, CYP3A4, UGT1A3, UGT2B7 (metabolism), OATP1B1, OATP1B3, P-gp/BCRP (GI efflux) | −35    | 1.1    | [393]            |
| Selumetinib              | Negative on C <sub>max</sub> | 0.85  | 6.55  | CYP2C19, UGT1A1 (metabolism), BCRP (GI efflux)                                             | −50.28 | −16.11 | [394,395]        |
| Sertindole               | None                         | 0.22  | NS    | CYP2D6/3A4 (metabolism)                                                                    | NA     | NA     | [396,397]        |
| Sildenafil               | Negative on C <sub>max</sub> | −0.94 | NS    | CYPs                                                                                       | −29.18 | −11.27 | [398]            |
| Sofosbuvir (GS-331007)   | Negative on C <sub>max</sub> | 0.29  | 30.22 | CES1 (metabolism), P-gp and/or BCRP (GI efflux)                                            | −25    | NA     | [399], FDA label |
| Solithromycin            | None                         | 1.98  | 18.93 | CYP3A4 (metabolism), P-gp (GI efflux)                                                      | NA     | NA     | [400,401]        |
| Sotalol                  | Negative                     | −0.09 | NS    | No metabolism                                                                              | −25    | −25    | [402]            |
| SRT-2104                 | Positive                     | 2.48  | NS    | NA                                                                                         | 249    | 273.53 | [403]            |
| Sulpiride                | Positive                     | −0.13 | 11.72 | PEPT1 (GI uptake), OCT1, OCT2, MATE1, and MATE2-K                                          | 25     | 25     | [404]            |
| Sunitinib maleate        | None                         | 0.81  | 3.76  | CYP3A4 (metabolism),                                                                       | 9.96   | 18.63  | [405,406]        |



|                          |                              |       |        |                                                                                                             |          |          |           |
|--------------------------|------------------------------|-------|--------|-------------------------------------------------------------------------------------------------------------|----------|----------|-----------|
|                          |                              |       |        | P-gp, BCRP (GI efflux)                                                                                      |          |          |           |
| Tacrolimus               | Negative                     | 0.70  | 0.25   | CYP3A4 (metabolism), P-gp/BCRP (GI efflux)                                                                  | −77.03   | −33.45   | [407,408] |
| Tadalafil                | None                         | −0.49 | 2.05   | CYP3A4 (metabolism), P-gp (GI efflux)                                                                       | 16.16    | 8.16     | 16487221  |
| Talazoparib              | Negative on C <sub>max</sub> | −1.70 | 0.05   | Minimal metabolism, P-gp, BCRP (GI efflux)                                                                  | −46      | NA       | [409]     |
| Tedizolid                | Negative on C <sub>max</sub> | 0.80  | NS     | SULT1A1, SULT1A2, SULT2A1 (metabolism)                                                                      | −26.56   | 2.38     | [410,411] |
| Tegafur/Ftorafur         | Negative on C <sub>max</sub> | −1.24 | NS     | CYP2A6 (metabolism), dihydropyrimidine dehydrogenase (DPD) (catabolic pathway), MRP8 (pepsinogen secretion) | −33.23   | −8.76    | [3]       |
| Telaprevir               | Positive on AUC              | 1.93  | 44.13  | CYP3A4 (extensive metabolism), P-gp (GI efflux)                                                             | NA       | 330      | [58,412]  |
| Telithromycin            | None                         | 2.05  | 39.41  | CYP3A4 (metabolism), P-gp, MRP2 (GI efflux)                                                                 | NA       | NA       | [413,414] |
| Tenoxicam                | None                         | −0.51 | NS     | CYP2C9/3A4 (metabolism)                                                                                     | NA       | NA       | [415]     |
| Terbinafine              | None                         | 3.13  | 34.31  | CYP2C9/1A2/3A4/2C8/2C19 (metabolism), P-gp (GI efflux)                                                      | 21.29    | 22.09    | [416–418] |
| Terfenadine              | Positive                     | 2.72  | NS     | CYP3A4 (metabolism)                                                                                         | 25       | 25       | [419]     |
| Testosterone undecanoate | Positive                     | 3.64  | NS     | Extensive metabolism, lymphatic transport                                                                   | 34960.24 | 27842.58 | [420,421] |
| Tetracycline             | Negative on C <sub>max</sub> | 0.18  | 45.00  | P-gp (GI efflux)                                                                                            | −50      | NA       | [422]     |
| Tetrahydrocannabinol     | Positive                     | 1.18  | NS     | CYPs 2C9, 3A4, UGTs (metabolism)                                                                            | 25       | 25       | [423]     |
| Theophylline             | Negative                     | −0.80 | 199.82 | CYP1A2 (extensive metabolism),                                                                              | −59      | −47      | [424,425] |

|                           |                              |       |       |                                                                                                             |        |        |                           |
|---------------------------|------------------------------|-------|-------|-------------------------------------------------------------------------------------------------------------|--------|--------|---------------------------|
|                           |                              |       |       | PEPT1 (GI uptake), P-gp (GI efflux)                                                                         |        |        |                           |
| Ticlopidine hydrochloride | None                         | 1.66  | NS    | CYP3A4, CYP2C19, and CYP2B6 (metabolism)                                                                    | 21.29  | 20     | [426–428]                 |
| Tipranavir                | Positive on AUC              | 3.59  | NS    | CYP3A (extensive metabolism)                                                                                | 16     | 31     | [58]                      |
| Tocotrienols (Vitamin E)  | Positive                     | 3.18  | NS    | CYP-mediated omega oxidation (CYP4F2) (metabolism), cholesterol transporter Niemann–Pick C1-like 1 (NPC1L1) | 216    | 175.86 | [429–431]                 |
| Tofacitinib               | None                         | −0.83 | 1.41  | CYP3A4/2C19 (metabolism), P-gp (GI efflux)                                                                  | 24.16  | 0.5    | [432,433]64803, FDA label |
| Tolterodine               | Positive                     | 0.18  | NS    | CYP2D6 (extensive metabolism)                                                                               | 43     | 33.33  | [434,435]                 |
| Topiramate                | None                         | −1.23 | 11.79 | CYP3A4 (metabolism), P-gp (GI efflux)                                                                       | 10.43  | 4.18   |                           |
| Topotecan                 | None                         | −1.69 | 0.41  | Hydrolysis (metabolism), P-gp/BCRP (GI efflux)                                                              | 15.8   | 13.92  | [436–438]                 |
| Torsemide                 | Negative on C <sub>max</sub> | 0.83  | NS    | CYP2C9 (extensive metabolism), OATP                                                                         | −33    | −2     | [439]                     |
| Trametinib                | Negative on C <sub>max</sub> | −0.58 | 0.13  | CES (metabolism), P-gp/BCRP (GI efflux)                                                                     | −68.42 | −15.26 | [440,441], FDA label      |
| Treprostinil              | Positive on AUC              | −0.26 | NS    | CYP2C8, UGTs (metabolism)                                                                                   | 13     | 49     | [442,443]                 |
| Troglitazone              | Positive                     | 3.12  | 36.24 | Sulfation, glucuronidation (extensive metabolism), BCRP (GI efflux)                                         | 100    | 58.33  | [444,445]                 |
| Trovaflaxacin             | None                         | 1.06  | 19.21 | UGT, CYP, SULT (metabolism), P-gp (GI efflux)                                                               | 11.53  | 3.29   | [446,447]                 |
| Tyramine                  | Negative                     | −0.85 | NS    | MAO-A, FMO3, PNMT, DBH,                                                                                     | −78.16 | −68.92 | [448,449]                 |

|              |                                 |       |       |                                                                                       |        |        |                  |
|--------------|---------------------------------|-------|-------|---------------------------------------------------------------------------------------|--------|--------|------------------|
|              |                                 |       |       | and CYP2D6<br>(metabolism)                                                            |        |        |                  |
| Udenafil     | None                            | 1.00  | 15.48 | CYP3A4<br>(metabolism)<br>and P-gp (GI<br>efflux)                                     | 20.26  | 3.9    | [450,451]        |
| Uracil       | Negative                        | −1.52 | NS    | CYP2A6<br>(metabolism),<br>sodium-depend<br>ent nucleobase<br>transporter<br>(rSNBT1) | −75.84 | −34.92 | [3,452]          |
| Valsartan    | Negative                        | 1.14  | 7.35  | OAT1, OAT3,<br>OATP1B1,<br>OATP1B3,<br>MRP2 (GI<br>efflux)                            | −40    | −50    | 26225262         |
| Vardenafil   | None                            | −0.91 | 0.82  | CYP3A4/3A5/2<br>C (metabolism),<br>P-gp, BCRP and<br>MRP2 (GI<br>efflux)              | NA     | NA     | [453–455]        |
| Veliparib    | None                            | −0.24 | 6.55  | CYPs<br>(metabolism),<br>P-gp (GI efflux)                                             | 17.64  | 4.08   | [456–459]        |
| Vemurafenib  | Positive                        | 4.03  | 78.38 | CYP3A4<br>(metabolism),<br>P-gp, BCRP (GI<br>efflux)                                  | 114.28 | 184.48 | [460,461]        |
| Venetoclax   | Positive                        | 2.33  | NS    | CYP3A4<br>(extensive<br>metabolism)                                                   | 300    | 352    | [462], FDA label |
| Venlafaxine  | None                            | −0.06 | 7.21  | CYP2D6<br>(metabolism),<br>P-gp (GI efflux)                                           | NA     | NA     | [463]            |
| Verinurad    | Negative on<br>C <sub>max</sub> | 1.23  | 2.30  | UGT2B17<br>(metabolism),<br>CYP3A, P-gp<br>(GI efflux)                                | −52.86 | −23.14 | [464–466]        |
| Vinorelbine  | Negative                        | 1.59  | 6.16  | CYP3A4<br>(extensive<br>metabolism),<br>MRP2 (GI<br>efflux)                           | −34.99 | −33.64 | [467,468]        |
| Voriconazole | Negative                        | 0.20  | 45.80 | CYP2C19,<br>CYP3A4,<br>CYP2C9<br>(metabolism),<br>P-gp (GI efflux)                    | −60.56 | −43.1  | [469–471]        |
| Zafirlukast  | Negative                        | 2.32  | NS    | CYP3A4,<br>CYP2C9<br>(extensive<br>metabolism)                                        | −25    | −25    | [472,473]        |
| Zalcitabine  | Negative on<br>C <sub>max</sub> | −3.07 | NS    | Metabolism,<br>OAT1                                                                   | −38.49 | −13.89 | [474–476]        |

|                |                                 |       |       |                                                                                                                    |        |        |           |
|----------------|---------------------------------|-------|-------|--------------------------------------------------------------------------------------------------------------------|--------|--------|-----------|
| Zileuton       | Positive on C <sub>max</sub>    | 1.65  | NS    | CYP1A2,<br>CYP2C9 and<br>CYP3A4<br>(metabolism)                                                                    | 27     | 1.4    | [477,478] |
| Zimelidine     | None                            | −0.78 | NS    | Extensive first<br>pass<br>metabolism                                                                              | NA     | NA     | [107,479] |
| Ziprasidone    | Positive                        | 1.65  | NS    | CYP3A4,<br>CYP1A2<br>(metabolism)                                                                                  | 84     | 104    | [480,481] |
| Zolmitriptan   | None                            | −1.28 | 0.35  | CYP1A2<br>(metabolism),<br>P-gp (GI efflux)                                                                        | 15.85  | 12     | [482,483] |
| Zolpidem       | Negative on<br>C <sub>max</sub> | −0.35 | 0.46  | CYP3A4,<br>CYP2C9,<br>CYP1A2,<br>CYP2D6,<br>CYP2C19<br>(metabolism),<br>P-gp (GI efflux)                           | −44.15 | 12.02  | [484–486] |
| Zuclopenthixol | Positive on<br>AUC              | 1.79  | NS    | Sulfoxidation,<br>side chain<br>N-dealkylation<br>and glucuronic<br>acid<br>conjugation,<br>CYP2D6<br>(metabolism) | NA     | 26     | [487,488] |
| Olanzapine     | None                            | −0.67 | 7.71  | Metabolism,<br>P-gp (GI efflux)                                                                                    | −19.75 | −3.49  | [489–491] |
| Warfarin       | Negative on<br>C <sub>max</sub> | −0.23 | NS    | CYP2C9, 1A2,<br>2C19, 3A4, 2C8,<br>2C18<br>(metabolism)                                                            | −47.61 | −7.12  | [492]     |
| Acebutolol     | None                            | 0.79  | 18.72 | P-gp (GI efflux)                                                                                                   | −20.73 | −5.65  | [493]     |
| Pantoprazole   | Negative on<br>AUC              | −0.49 | 4.17  | Metabolism,<br>P-gp (GI efflux)                                                                                    | −4.78  | −33.34 | [494]     |
| Rabeprazole    | None                            | −0.62 | NS    | Metabolism                                                                                                         | 21.46  | 7.76   | [494]     |
| Omeprazole     | Negative on<br>C <sub>max</sub> | −0.35 | 4.63  | P-gp                                                                                                               | −26.67 | −11.98 | [494]     |
| Peficitinib    | Positive                        | 0.58  | NS    | Metabolism                                                                                                         | 56.05  | 34.77  | [495]     |

NA: not available; NS: non-substrate.

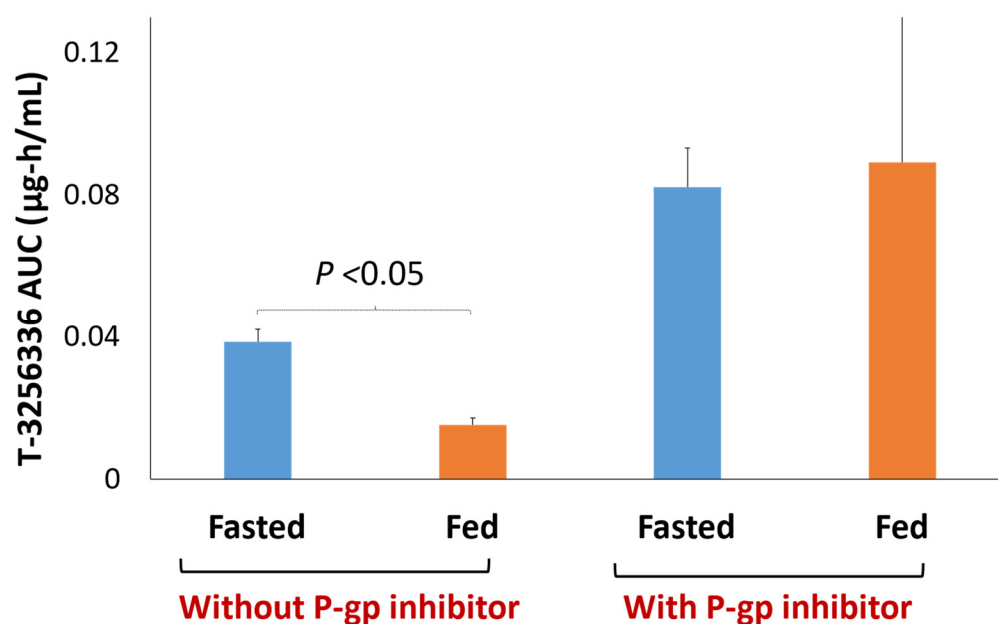

**Figure S1.** P-gp-dependent food-effect due to prolonged gastric emptying time and increased efficiency of P-gp efflux in the fed state. This mechanism is exemplified in the literature [496].

## References

- Yu, D.K.; Elvin, A.T.; Morrill, B.; Eichmeier, L.S.; Lanman, R.C.; Lanman, M.B.; Giesing, D.H. Effect of Food Coadministration on 5-Aminosalicylic Acid Oral Suspension Bioavailability. *Clin Pharmacol Ther* 1990, 48, 26–33.
- Bondesen, S.; Hegnhøj, J.; Larsen, F.; Hansen, S.H.; Hansen, C.P.; Rasmussen, S.N. Pharmacokinetics of 5-Aminosalicylic Acid in Man Following Administration of Intravenous Bolus and per Os Slow-Release Formulation. *Dig Dis Sci* 1991, 36, 1735–1740.
- Damle, B.; Ravandi, F.; Kaul, S.; Sonnichsen, D.; Ferreira, I.; Brooks, D.; Stewart, D.; Alberts, D.; Pazdur, R. Effect of Food on the Oral Bioavailability of UFT and Leucovorin in Cancer Patients. *Clin Cancer Res* 2001, 7, 517–523.
- Burton, N.K.; Barnett, M.J.; Aherne, G.W.; Evans, J.; Douglas, I.; Lister, T.A. The Effect of Food on the Oral Administration of 6-Mercaptopurine. *Cancer Chemother Pharmacol* 1986, 18, 90–91.
- Chittick, G.E.; Gillotin, C.; McDowell, J.A.; Lou, Y.; Edwards, K.D.; Prince, W.T.; Stein, D.S. Abacavir: Absolute Bioavailability, Bioequivalence of Three Oral Formulations, and Effect of Food. *Pharmacotherapy* 1999, 19, 932–942.
- Yuen, G.J.; Weller, S.; Pakes, G.E. A Review of the Pharmacokinetics of Abacavir. *Clin Pharmacokinet* 2008, 47, 351–371.
- Papangelou, A.; Olszanski, A.J.; Stein, C.A.; Bosch, B.; Nemeth, P. The Effect of Food on the Absorption of Abiraterone Acetate from a Fine Particle Dosage Form: A Randomized Crossover Trial in Healthy Volunteers. *Oncology and Therapy* 2017, 5, 161–170.
- Othman, A.A.; Nothaft, W.; Awni, W.M.; Dutta, S. Pharmacokinetics of the TRPV1 Antagonist ABT-102 in Healthy Human Volunteers: Population Analysis of Data from 3 Phase 1 Trials. *J Clin Pharmacol* 2012, 52, 1028–1041.
- Othman, A.A.; Cheskin, H.; Locke, C.; Nothaft, W.; Dutta, S. A Phase 1 Study to Evaluate the Bioavailability and Food Effect of 2 Solid-Dispersion Formulations of the TRPV1 Antagonist ABT-102, Relative to the Oral Solution Formulation, in Healthy Human Volunteers. *Clin Pharmacol Drug Dev* 2012, 1, 24–31.
- Scherrer, D.; Rouzier, R.; Noel Barrett, P.; Steens, J.M.; Gineste, P.; Murphy, R.L.; Tazi, J.; Ehrlich, H.J. Pharmacokinetics and Tolerability of ABX464, a Novel First-in-Class Compound to Treat HIV Infection, in Healthy HIV-Uninfected Subjects. *J Antimicrob Chemother* 2017, 72, 820–828.
- Gregoire, N.; Hovsepian, L.; Gualano, V.; Evane, E.; Dufour, G.; Gendron, A. Safety and Pharmacokinetics of Paracetamol Following Intravenous Administration of 5 g during the First 24 h with a 2-g Starting Dose. *Clin Pharmacol Ther* 2007, 81, 401–405.
- Liu, D.J.; Collaku, A.; Youngberg, S.P. Bioavailability and Pharmacokinetic Profile of a Newly-Developed Twice-a-Day Sustained-Release Paracetamol Formulation. *Int J Clin Pharmacol Ther* 2015, 53, 172–181.
- Efthymiopoulos C.; Benedetti MS; Poggesi I; Ruff F; Basileo G; Musatti L Pharmacokinetics of Acipimox and of Its N-Deoxy Metabolite Following Single and Repeated Oral Administration to Healthy Volunteers. *Therapie* 1993, 48, 23–26.
- Musatti, L.; Maggi, E.; Moro, E.; Valzelli, G.; Tamassia, V. Bioavailability and Pharmacokinetics in Man of Acipimox, a New Antilipolytic and Hypolipemic Agent. *J Int Med Res* 1981, 9, 381–386.
- Fleishaker, J.C.; Phillips, J.P.; Lau, H.S.H. Effect of Food on the Bioavailability of Adinazolam from a Sustained Release Formulation: Effect of Meal Timing and Lack of Dose Dumping. *Biopharm Drug Dispos* 1990, 11, 715–727.

16. van Hoppe, S.; Sparidans, R.W.; Wagenaar, E.; Beijnen, J.H.; Schinkel, A.H. Breast Cancer Resistance Protein (BCRP/ABCG2) and P-Glycoprotein (P-Gp/ABCB1) Transport Afatinib and Restrict Its Oral Availability and Brain Accumulation. *Pharmacol Res* 2017, 120, 43–50.
17. Stopfer, P.; Marzin, K.; Narjes, H.; Gansser, D.; Shahidi, M.; Uttareuther-Fischer, M.; Ebner, T. Afatinib Pharmacokinetics and Metabolism after Oral Administration to Healthy Male Volunteers. *Cancer Chemother Pharmacol* 2012, 69, 1051–1061.
18. Wind, S.; Schnell, D.; Ebner, T.; Freiwald, M.; Stopfer, P. Clinical Pharmacokinetics and Pharmacodynamics of Afatinib. *Clin Pharmacokinet* 2017, 56, 235–250.
19. Ceballos, L.; Krolewiecki, A.; Juárez, M.; Moreno, L.; Schaer, F.; Alvarez, L.I.; Cimino, R.; Walson, J.; Lanusse, C.E. Assessment of Serum Pharmacokinetics and Urinary Excretion of Albendazole and Its Metabolites in Human Volunteers. *PLoS Negl Trop Dis* 2018, 12.
20. Nagy J; Schipper H G; Koopmans R P; Butter J J; van Boxtel C J; Kager P A Effect of Grapefruit Juice or Cimetidine Coadministration on Albendazole Bioavailability. *Am J Trop Med Hyg* 2002, 66, 260–263.
21. Nagy, J.; Schipper, H.G.; Koopmans, R.P.; Butter, J.J.; van Boxtel, C.J.; Kager, P.A. Effect of Grapefruit Juice or Cimetidine Coadministration on Albendazole Bioavailability. *Am J Trop Med Hyg* 2002, 66, 260–263.
22. Parrott, N.J.; Yu, L.J.; Takano, R.; Nakamura, M.; Morcos, P.N. Physiologically Based Absorption Modeling to Explore the Impact of Food and Gastric PH Changes on the Pharmacokinetics of Alectinib. *AAPS J* 2016, 18, 1464–1474.
23. Morcos, P.N.; Guerini, E.; Parrott, N.; Dall, G.; Blotner, S.; Bogman, K.; Sturm, C.; Balas, B.; Martin-Facklam, M.; Phipps, A. Effect of Food and Esomeprazole on the Pharmacokinetics of Alectinib, a Highly Selective ALK Inhibitor, in Healthy Subjects. *Clin Pharmacol Drug Dev* 2017, 6, 388–397.
24. Schmitt-Hoffmann, A.H.; Roos, B.; Sauer, J.; Schleimer, M.; Kovacs, P.; Stoeckel, K.; Maeres, J. Influence of Food on the Pharmacokinetics of Oral Alitretinoin (9-Cis Retinoic Acid). *Clin Exp Dermatol* 2011, 36, 18–23.
25. Smith, R.B.; Kroboth, P.D.; Vanderlugt, J.T.; Phillips, J.P.; Juhl, R.P. Pharmacokinetics and Pharmacodynamics of Alprazolam after Oral and IV Administration. *Psychopharmacology* 1984, 84, 452–456.
26. Erdman, K.; Stypinski, D.; Combs, M.; Witt, P.; Stiles, M.; Pollock, S. Absence of Food Effect on the Extent of Alprazolam Absorption from an Orally Disintegrating Tablet. *Pharmacotherapy* 2007, 27, 1120–1124.
27. Haroldsen, P.E.; Garovoy, M.R.; Musson, D.G.; Zhou, H.; Tsuruda, L.; Hanson, B.; O'Neill, C.A. Genetic Variation in Aryl N-Acetyltransferase Results in Significant Differences in the Pharmacokinetic and Safety Profiles of Amifampridine (3,4-Diaminopyridine) Phosphate. *Pharmacol Res Perspect* 2015, 3, 1–13.
28. Haroldsen, P.E.; Sisic, Z.; Datt, J.; Musson, D.G.; Ingenito, G. Acetylator Status Impacts Amifampridine Phosphate (Firdapse™) Pharmacokinetics and Exposure to a Greater Extent Than Renal Function. *Clin Ther* 2017, 39, 1360–1370.
29. Haroldsen, P.E.; Musson, D.G.; Hanson, B.; Quartel, A.; O'Neill, C.A. Effects of Food Intake on the Relative Bioavailability of Amifampridine Phosphate Salt in Healthy Adults. *Clin Ther* 2015, 37, 1555–1563.
30. Latini, R.; Tognoni, G.; Kates, R.E. Clinical Pharmacokinetics of Amiodarone. *Clin Pharmacokinet* 1984, 9, 136–156.
31. Meng, X.; Mojaverian, P.; Doedée, M.; Lin, E.; Weinryb, I.; Chiang, S.T.; Kowey, P.R. Bioavailability of Amiodarone Tablets Administered with and without Food in Healthy Subjects. *Am J Cardiol* 2001, 87, 432–435.
32. Liedholm, H.; Lidén, A. Food Intake and the Presystemic Metabolism of Single Doses of Amitriptyline and Nortriptyline. *Fundam Clin Pharmacol* 1998, 12, 636–642.
33. Liu, Y.; Jia, J.; Liu, G.; Li, S.; Lu, C.; Liu, Y.; Yu, C. Pharmacokinetics and Bioequivalence Evaluation of Two Formulations of 10-Mg Amlodipine Besylate: An Open-Label, Single-Dose, Randomized, Two-Way Crossover Study in Healthy Chinese Male Volunteers. *Clin Ther* 2009, 31, 777–783.
34. Faulkner J K; Hayden M L; Chasseaud L F; Taylor T Absorption of Amlodipine Unaffected by Food. Solid Dose Equivalent to Solution Dose. *Arzneimittelforschung* 1989, 39, 799–801.
35. Lecaillon, J.; Dubois, J.; Soula, G.; Pichard, E.; Poltera, A.; Ginger, C. The Influence of Food on the Pharmacokinetics of CGP 6140 (Amocarzine) after Oral Administration of a 1200 Mg Single Dose to Patients with Onchocerciasis. *Br J Clin Pharmacol* 1990, 30, 629–633.
36. Lecaillon, J.; Dubois, J.; Awadzi, K.; Poltera, A.; Ginger, C. Pharmacokinetics of CGP 6140 (Amocarzine) after Oral Administration of Single 100-1600 Mg Doses to Patients with Onchocerciasis. *Br J Clin Pharmacol* 1990, 30, 625–628.
37. Eshelman, F.N.; Spyker, D.A. Pharmacokinetics of Amoxicillin and Ampicillin. Crossover Study of the Effect of Food. *Antimicrob Agents Chemother* 1978, 14, 539–543.
38. Le, J.; Poindexter, B.; Sullivan, J.E.; Laughon, M.; Delmore, P.; Blackford, M.; Yogev, R.; James, L.P.; Melloni, C.; Harper, B.; et al. Comparative Analysis of Ampicillin Plasma and Dried Blood Spot Pharmacokinetics in Neonates. *Ther Drug Monit* 2018, 40, 103–108.
39. Byon, W.; Garonzik, S.; Boyd, R.A.; Frost, C.E. Apixaban: A Clinical Pharmacokinetic and Pharmacodynamic Review. *Clin Pharmacokinet* 2019, 58, 1265–1279.
40. Song, Y.; Chang, M.; Suzuki, A.; Frost, R.J.A.; Kelly, A.; LaCreta, F.; Frost, C. Evaluation of Crushed Tablet for Oral Administration and the Effect of Food on Apixaban Pharmacokinetics in Healthy Adults. *Clin Ther* 2016, 38, 1674–1685.e1.
41. Majumdar, A.K.; Howard, L.; Goldberg, M.R.; Hickey, L.; Constanzer, M.; Rothenberg, P.L.; Crumley, T.M.; Panebianco, D.; Bradstreet, T.E.; Bergman, A.J.; et al. Pharmacokinetics of Aprepitant after Single and Multiple Oral Doses in Healthy Volunteers. *J Clin Pharmacol* 2006, 46, 291–300.

42. Shono, Y.; Jantravid, E.; Kesiosoglou, F.; Reppas, C.; Dressman, J.B. Forecasting in Vivo Oral Absorption and Food Effect of Micronized and Nanosized Aprepitant Formulations in Humans. *Eur J Pharm Biopharm* 2010, 76, 95–104.
43. Dien, T.K.; de Vries, P.J.; Khanh, N.X.; Koopmans, R.; Binh, L.N.; Duc, D.D.; Kager, P.A.; van Boxtel, C.J. Effect of Food Intake on Pharmacokinetics of Oral Artemisinin in Healthy Vietnamese Subjects. *Antimicrob Agents Chemother* 1997, 41, 1069–1072.
44. Schoepfer, J.; Jahnke, W.; Berellini, G.; Buonamici, S.; Cotesta, S.; Cowan-Jacob, S.W.; Dodd, S.; Drueckes, P.; Fabbro, D.; Gabriel, T.; et al. Discovery of Asciminib (ABL001), an Allosteric Inhibitor of the Tyrosine Kinase Activity of BCR-ABL1. *J Med Chem* 2018, 61, 8120–8135.
45. Menssen, H.D.; Quinlan, M.; Kemp, C.; Tian, X. Relative Bioavailability and Food Effect Evaluation for 2 Tablet Formulations of Asciminib in a 2-Arm, Crossover, Randomized, Open-Label Study in Healthy Volunteers. *Clin Pharmacol Drug Dev* 2019, 8, 385–394.
46. le Tiec, C.; Barrail, A.; Goujard, C.; Taburet, A.M. Clinical Pharmacokinetics and Summary of Efficacy and Tolerability of Atazanavir. *Clin Pharmacokinet* 2005, 44, 1035–1050.
47. Melander, A.; Stenberg, P.; Liedholm, H.; Scherstén, B.; Wåhlin-Boll, E. Food-Induced Reduction in Bioavailability of Atenolol. *Eur J Clin Pharmacol* 1979, 16, 327–330.
48. Lennernäs, H. Clinical Pharmacokinetics of Atorvastatin. *Clin Pharmacokinet* 2003, 42, 1141–1160.
49. Radulovic, L.L.; Cilla, D.D.; Posvar, E.L.; Sedman, A.J.; Whitfield, L.R. Effect of Food on the Bioavailability of Atorvastatin, an HMG-CoA Reductase Inhibitor. *J Clin Pharmacol* 1995, 35, 990–994.
50. Beermann, B.; Groschinsky-Grind, M.; Lindström, B. Pharmacokinetics of Bendroflumethiazide. *Clin Pharmacol Ther* 1977, 22, 385–388.
51. Beermann, B.; Groschinsky-Grind, M.; Lindström, B. Effect of Food on the Bioavailability of Bendroflumethiazide. *Acta Med Scand* 1978, 204, 291–293.
52. Toothaker, R.D.; Randinitis, E.J.; Nelson, C.; PhD, A.W.K.; Goulet, J.R. The Influence of Food on the Oral Absorption of Bevantolol. *J Clin Pharmacol* 1987, 27, 297–299.
53. Pao, L.H.; Zhou, S.Y.; Cook, C.; Kararli, T.; Kirchhoff, C.; Truelove, J.; Karim, A.; Fleisher, D. Reduced Systemic Availability of an Antiarrhythmic Drug, Bidisomide, with Meal Co-Administration: Relationship with Region-Dependent Intestinal Absorption. *Pharm Res* 1998, 15, 221–227.
54. Chen, X.; Wang, H.; Jiang, J.; Chen, R.; Zhou, Y.; Zhong, W.; Liu, H.; Hu, P. The Pharmacokinetic and Safety Profiles of Blonanserine in Healthy Chinese Volunteers after Single Fasting Doses and Single and Multiple Postprandial Doses. *Clin Drug Investig* 2014, 34, 213–222.
55. Saruwatari, J.; Yasui-Furukori, N.; Inoue, Y.; Kaneko, S. Effect of Dose Timing in Relation to Food Intake on Systemic Exposure to Blonanserine. *Eur J Clin Pharmacol* 2010, 66, 899–902.
56. Marathe, P.; Tang, Y.; Slecicka, B.; Rodrigues, D.; Gavai, A.; Wong, T.; Christopher, L.; Zhang, H. Preclinical Pharmacokinetics and in Vitro Metabolism of BMS-690514, a Potent Inhibitor of EGFR and VEGFR2. *J Pharm Sci* 2010, 99, 3579–3593.
57. Vakkalagadda, B.; Park, J.S.; Ahlers, C.M.; Dorizio, S.; Has, T.; Roongta, V.; Heller, K.N.; Derbin, G.M.; Zhang, S. Food Increased the Bioavailability of BMS-690514, an Orally Active EGFR/HER2/VEGF Receptor Kinase Inhibitor, in Healthy Subjects. *J Clin Pharmacol* 2012, 52, 1350–1356.
58. Impact of Food/M meal on Antiretroviral Drug Absorption Available online: [https://hivclinic.ca/main/drugs\\_extra\\_files/Food%20impact%20on%20ARV%20PK.pdf](https://hivclinic.ca/main/drugs_extra_files/Food%20impact%20on%20ARV%20PK.pdf) (accessed on 28 May 2021).
59. Weber, C.; Schmitt, R.; Birnboeck, H.; Hopfgartner, G.; van Marie, S.P.; Peeters, P.A.M.; Jonkman, J.H.G.; Jones, C.R. Pharmacokinetics and Pharmacodynamics of the Endothelin-Receptor Antagonist Bosentan in Healthy Human Subjects. *Clin Pharmacol Ther* 1996, 60, 124–137.
60. Dingemans, J.; Bodin, F.; Weidekamm, E.; Kutz, K.; van Giersbergen, P. Influence of Food Intake and Formulation on the Pharmacokinetics and Metabolism of Bosentan, a Dual Endothelin Receptor Antagonist. *J Clin Pharmacol* 2002, 42, 283–289.
61. Yamazaki, S.; Loi, C.M.; Kimoto, E.; Costales, C.; Varma, M. v. Application of Physiologically Based Pharmacokinetic Modeling in Understanding Bosutinib Drug-Drug Interactions: Importance of Intestinal P-Glycoprotein. *Drug Metab Dispos* 2018, 46, 1200–1211.
62. Skjold, N.M.; Davies, N.M. Clinical Pharmacokinetics and Pharmacodynamics of Bromfenac. *Clin Pharmacokinet* 1999, 36, 399–408.
63. Fujii, J.; Inotsume, N.; Nakano, M. Effect of Food on the Bioavailability of Bromazepam Following Oral Administration in Healthy Volunteers. *J Pharmacobiodyn* 1990, 13, 269–271.
64. Maurer, G.; Schreier, E.; Delaborde, S.; Nufer, R.; Shukla, A.P. Fate and Disposition of Bromocriptine in Animals and Man. II: Absorption, Elimination and Metabolism. *Eur J Drug Metab Pharmacokinet* 1983, 8, 51–62.
65. Kopitar, Z.; Vrhovac, B.; Povšić, L.; Plavšić, F.; Francetić, I.; Urbančič, J. The Effect of Food and Metoclopramide on the Pharmacokinetics and Side Effects of Bromocriptine. *Eur J Drug Metab Pharmacokinet* 1991, 16, 177–181.
66. McCrindle, J.L.; Li, T.C.; Wa, K.; Barron, W.; Prescott, L.F. Effect of Food on the Absorption of Frusemide and Bumetanide in Man. *Br J Clin Pharmacol* 1996, 42, 743–746.
67. Marcantonio, L.A.; Auld, W.H.R.; Skellern, G.G.; Howes, C.A.; Murdoch, W.R.; Purohit, R. The Pharmacokinetics and Pharmacodynamics of Bumetanide in Normal Subjects. *J Pharmacokinet Biopharm* 1982, 10, 393–409.

68. Lacy, S.; Hsu, B.; Miles, D.; Aftab, D.; Wang, R.; Nguyen, L. Metabolism and Disposition of Cabozantinib in Healthy Male Volunteers and Pharmacologic Characterization of Its Major Metabolites. *Drug Metab Dispos* 2015, 43, 1190–1207.
69. Nguyen, L.; Holland, J.; Mamelok, R.; Laberge, M.K.; Grenier, J.; Swearingen, D.; Armas, D.; Lacy, S. Evaluation of the Effect of Food and Gastric PH on the Single-Dose Pharmacokinetics of Cabozantinib in Healthy Adult Subjects. *J Clin Pharmacol* 2015, 55, 1293–1302.
70. Devineni, D.; Murphy, J.; Wang, S.S.; Stieltjes, H.; Rothenberg, P.; Scheers, E.; Mamidi, R.N.V.S. Absolute Oral Bioavailability and Pharmacokinetics of Canagliflozin: A Microdose Study in Healthy Participants. *Clin Pharmacol Drug Dev* 2015, 4, 295–304.
71. Gleiter, C.H.; Mörike, K.E. Clinical Pharmacokinetics of Candesartan. *Clin Pharmacokinet* 2002, 41, 7–17.
72. Simon, G.R.; Garrett, C.R.; Olson, S.C.; Langevin, M.; Eiseman, I.A.; Mahany, J.J.; Williams, C.C.; Lush, R.; Daud, A.; Munster, P.; et al. Increased Bioavailability of Intravenous versus Oral CI-1033, a Pan ErbB Tyrosine Kinase Inhibitor: Results of a Phase I Pharmacokinetic Study. *Clin Cancer Res* 2006, 12, 4645–4651.
73. Millar, S.A.; Stone, N.L.; Yates, A.S.; O'Sullivan, S.E. A Systematic Review on the Pharmacokinetics of Cannabidiol in Humans. *Front Pharmacol* 2018, 9, 1365–undefined.
74. Singhvi, S.M.; McKinstry, D.N.; Shaw, J.M.; Willard, D.A.; Migdalof, B.H. Effect of Food on the Bioavailability of Captopril in Healthy Subjects. *J Clin Pharmacol* 1982, 22, 135–140.
75. Bauer, K.S.; Kohn, E.C.; Lush, R.M.; Steinberg, S.M.; Davis, P.; Kohler, D.; Reed, E.; Figg, W.D. Pharmacokinetics and Relative Bioavailability of Carboxyamido-Triazole with Respect to Food and Time of Administration: Use of a Single Model for Simultaneous Determination of Changing Parameters. *J Pharmacokinet Biopharm* 1998, 26, 673–687.
76. Tang, W.; McCormick, A.; Li, J.; Masson, E. Clinical Pharmacokinetics and Pharmacodynamics of Cediranib. *Clin Pharmacokinet* 2017, 56, 689–702.
77. Mitchell, C.L.; O'Connor, J.P.B.; Roberts, C.; Watson, Y.; Jackson, A.; Cheung, S.; Evans, J.; Spicer, J.; Harris, A.; Kelly, C.; et al. A Two-Part Phase II Study of Cediranib in Patients with Advanced Solid Tumours: The Effect of Food on Single-Dose Pharmacokinetics and an Evaluation of Safety, Efficacy and Imaging Pharmacodynamics. *Cancer Chemother Pharmacol* 2011, 68, 631–641.
78. Borin, M.T.; Forbes, K.K.; Hughes, G.S. The Bioavailability of Cefpodoxime Proxetil Tablets Relative to an Oral Solution. *Biopharm Drug Dispos* 1995, 16, 295–302.
79. Konishi, K.; Suzuki, H.; Hayashi, M.; Saruta, T. Pharmacokinetics of Cefuroxime Axetil in Patients with Normal and Impaired Renal Function. *J Antimicrob Chemother* 1993, 31, 413–420.
80. Finn, A.; Straughn, A.; Meyer, M.; Chubb, J. Effect of Dose and Food on the Bioavailability of Cefuroxime Axetil. *Biopharm Drug Dispos* 1987, 8, 519–526.
81. Davies, N.M.; McLachlan, A.J.; Day, R.O.; Williams, K.M. Clinical Pharmacokinetics and Pharmacodynamics of Celecoxib. A Selective Cyclo-Oxygenase-2 Inhibitor. *Clin Pharmacokinet* 2000, 38, 225–242.
82. Liston, D.R.; Davis, M. Clinically Relevant Concentrations of Anticancer Drugs: A Guide for Nonclinical Studies. *Clin Cancer Res* 2017, 23, 3489–3498.
83. Lau, Y.Y.; Gu, W.; Lin, T.; Song, D.; Yu, R.; Scott, J.W. Effects of Meal Type on the Oral Bioavailability of the ALK Inhibitor Ceritinib in Healthy Adult Subjects. *J Clin Pharmacol* 2016, 56, 559–566.
84. Moore, B.R.; Page-Sharp, M.; Stoney, J.R.; Ilett, K.F.; Jago, J.D.; Batty, K.T. Pharmacokinetics, Pharmacodynamics, and Allometric Scaling of Chloroquine in a Murine Malaria Model. *Antimicrob Agents Chemother* 2011, 55, 3899–3907.
85. Tulpule, A.; Krishnaswamy, K. Effect of Food on Bioavailability of Chloroquine. *Eur J Clin Pharmacol* 1982, 23, 271–273.
86. Jung, D.; Lam, H. di; Chu, M. Absorption and Disposition Kinetics of Chlorothiazide in Protein-calorie Malnutrition. *Biopharm Drug Dispos* 1990, 11, 53–60.
87. Welling, P.G.; Barbhuiya, R.H. Influence of Food and Fluid Volume on Chlorothiazide Bioavailability: Comparison of Plasma and Urinary Excretion Methods. *J Pharm Sci* 1982, 71, 32–35.
88. Massarella, J.W.; Blumenthal, H.P.; Silvestri, T.; Lin, A. Effect of Food on Cibenzone Bioavailability. *Eur J Clin Pharmacol* 1986, 30, 367–369.
89. Williams, P.; Brown, A.; Rajaguru, S.; Francis, R.; Walters, G.; McEwen, J.; Durnin, C. The Pharmacokinetics and Bioavailability of Cilazapril in Normal Man. *Br J Clin Pharmacol* 1989, 27, 181S–188S.
90. Massarella, J.; DeFeo, T.; Brown, A.; Lin, A.; Wills, R. The Influence of Food on the Pharmacokinetics and ACE Inhibition of Cilazapril. *Br J Clin Pharmacol* 1989, 27, 205S–209S.
91. Bramer, S.L.; Forbes, W.P.; Mallikaarjun, S. Cilostazol Pharmacokinetics after Single and Multiple Oral Doses in Healthy Males and Patients with Intermittent Claudication Resulting from Peripheral Arterial Disease. *Clin Pharmacokinet* 1999, 37, 1–11.
92. Bramer, S.L.; Forbes, W.P. Relative Bioavailability and Effects of a High Fat Meal on Single Dose Cilostazol Pharmacokinetics. *Clin Pharmacokinet* 1999, 37, 13–23.
93. Christiansen, M.L.; Holm, R.; Abrahamsson, B.; Jacobsen, J.; Kristensen, J.; Andersen, J.R.; Müllertz, A. Effect of Food Intake and Co-Administration of Placebo Self-Nanoemulsifying Drug Delivery Systems on the Absorption of Cinnarizine in Healthy Human Volunteers. *Eur J Pharm Sci* 2016, 84, 77–82.
94. Hoffken, G.; Lode, H.; Prinzing, C.; Borner, K.; Koeppe, P. Pharmacokinetics of Ciprofloxacin after Oral and Parenteral Administration. *Antimicrob Agents Chemother* 1985, 27, 375–379.



95. Radwan, A.; Zaid, A.N.; Jaradat, N.; Odeh, Y. Food Effect: The Combined Effect of Media PH and Viscosity on the Gastro-intestinal Absorption of Ciprofloxacin Tablet. *Eur J Pharm Sci* 2017, 101, 100–106.
96. Audet, P.R.; Chiang, S.; Maroli, A.; Locniskar, A.; Morrison, G. The Effect of Food on Ciramadol Bioavailability in Normal Subjects. *Biopharm Drug Dispos* 1987, 8, 299–304.
97. Conrad, K.A.; Lee, S.M. Clodronate Kinetics and Dynamics. *Clin Pharmacol Ther* 1981, 30, 114–120.
98. Laitinen, K.; Patronen, A.; Harju, P.; Löyttyniemi, E.; Pylkkänen, L.; Kleimola, T.; Perttunen, K. Timing of Food Intake Has a Marked Effect on the Bioavailability of Clodronate. *Bone* 2000, 27, 293–296.
99. Nirogi, R.V.S.; Kandikere, V.N.; Mudigonda, K. Effect of Food on Bioavailability of a Single Oral Dose of Clopidogrel in Healthy Male Subjects. *Arzneimittelforschung* 2006, 56, 735–739.
100. Cushing, D.J.; Souney, P.F.; Cooper, W.D.; Mosher, G.L.; Adams, M.P.; Machatha, S.; Zhang, B.; Kowey, P.R. Pharmacokinetics and Platelet Aggregation Inhibitory Effects of a Novel Intravenous Formulation of Clopidogrel in Humans. *Clin Exp Pharmacol Physiol* 2012, 39, 3–8.
101. Cheng, Y.F.; Lundberg, T.; Bondesson, U.; Lindström, L.; Gabrielsson, J. Clinical Pharmacokinetics of Clozapine in Chronic Schizophrenic Patients. *Eur J Clin Pharmacol* 1988, 34, 445–449.
102. DiSanto, A.R.; Golden, G. Effect of Food on the Pharmacokinetics of Clozapine Orally Disintegrating Tablet 12.5mg: A Randomized, Open-Label, Crossover Study in Healthy Male Subjects. *Clin Drug Investig* 2009, 29, 539–549.
103. Gaur, A.H.; Kizito, H.; Prasitsuebsai, W.; Rakhmanina, N.; Rassool, M.; Chakraborty, R.; Batra, J.; Kosalaraksa, P.; Luesomboon, W.; Porter, D.; et al. Safety, Efficacy, and Pharmacokinetics of a Single-Tablet Regimen Containing Elvitegravir, Cobicistat, Emtricitabine, and Tenofovir Alafenamide in Treatment-Naive, HIV-Infected Adolescents: A Single-Arm, Open-Label Trial. *Lancet HIV* 2016, 3, e561–e568.
104. Takahashi, R.H.; Choo, E.F.; Ma, S.; Wong, S.; Halladay, J.; Deng, Y.; Rooney, I.; Gates, M.; Hop, C.E.C.A.; Khojasteh, S.C.; et al. Absorption, Metabolism, Excretion, and the Contribution of Intestinal Metabolism to the Oral Disposition of [14C]Cobimetinib, a MEK Inhibitor, in Humans. *Drug Metab Dispos* 2016, 44, 28–39.
105. Musib, L.; Choo, E.; Deng, Y.; Eppler, S.; Rooney, I.; Chan, I.T.; Dresser, M.J. Absolute Bioavailability and Effect of Formulation Change, Food, or Elevated PH with Rabeprazole on Cobimetinib Absorption in Healthy Subjects. *Mol Pharm* 2013, 10, 4046–4054.
106. Yue, Q.; Hasselstrom, J.; Svensson, J.; Sawe, J. Pharmacokinetics of Codeine and Its Metabolites in Caucasian Healthy Volunteers: Comparisons between Extensive and Poor Hydroxylators of Debrisoquine. *Br J Clin Pharmacol* 1991, 31, 635–642.
107. Melander, A.; Mclean, A. Influence of Food Intake on Presystemic Clearance of Drugs. *Clin Pharmacokinet* 1983, 8, 286–296.
108. Xu, H.; O’Gorman, M.; Boutros, T.; Brega, N.; Kantaridis, C.; Tan, W.; Bello, A. Evaluation of Crizotinib Absolute Bioavailability, the Bioequivalence of Three Oral Formulations, and the Effect of Food on Crizotinib Pharmacokinetics in Healthy Subjects. *J Clin Pharmacol* 2015, 55, 104–113.
109. Kaniwa, N.; Ogata, H.; Aoyagi, N.; Ejima, A.; Takahashi, T.; Uezono, Y.; Imazato, Y. Effect of Food on the Bioavailability of Cyclandelate from Commercial Capsules. *Clin Pharmacol Ther* 1991, 49, 641–647.
110. Gupta, S.K.; Manfro, R.C.; Tomlanovich, S.J.; Gambertoglio, J.G.; Garovoy, M.R.; Benet, L.Z. Effect of Food on the Pharmacokinetics of Cyclosporine in Healthy Subjects Following Oral and Intravenous Administration. *J Clin Pharmacol* 1990, 30, 643–653.
111. Denton, C.L.; Minthorn, E.; Carson, S.W.; Young, G.C.; Richards-peterson, L.E.; Botbyl, J.; Han, C.; Morrison, R.A.; Blackman, S.C.; Ouellet, D. Concomitant Oral and Intravenous Pharmacokinetics of Dabrafenib, a BRAF Inhibitor, in Patients with BRAF V600 Mutation-Positive Solid Tumors. *J Clin Pharmacol* 2013, 53, 955–961.
112. Ouellet, D.; Grossmann, K.F.; Limentani, G.; Nebot, N.; Lan, K.; Knowles, L.; Gordon, M.S.; Sharma, S.; Infante, J.R.; Lorusso, P.M.; et al. Effects of Particle Size, Food, and Capsule Shell Composition on the Oral Bioavailability of Dabrafenib, a BRAF Inhibitor, in Patients with BRAF Mutation-Positive Tumors. *J Pharm Sci* 2013, 102, 3100–3109.
113. Hooper, W.D.; Eadie, M.J.; Dickinson, R.G. Single Oral Dose Pharmacokinetics and Comparative Bioavailability of Danazol in Humans. *Biopharm Drug Dispos* 1991, 12, 577–582.
114. Sunesen, V.H.; Vedelsdal, R.; Kristensen, H.G.; Christrup, L.; Müllertz, A. Effect of Liquid Volume and Food Intake on the Absolute Bioavailability of Danazol, a Poorly Soluble Drug. *Eur J Pharm Sci* 2005, 24, 297–303.
115. Thomas, N.K.; Anne B.; Frank L. T.; Tony V.; Tom Van De C.; Richard M. W. H. Pharmacokinetics and Pharmacodynamics of Boosted Once-Daily Darunavir - PubMed. *J Antimicrob Chemother* 2014, 69, 2591–2605.
116. Séchaud, R.; Robeva, A.; Belleli, R.; Balez, S. Absolute Oral Bioavailability and Disposition of Deferasirox in Healthy Human Subjects. *J Clin Pharmacol* 2008, 48, 919–925.
117. Galanello, R.; Piga, A.; Domenica Cappellini, M.; Luca Forni, G.; Zappu, A.; Origa, R.; Dutreix, C.; Belleli, R.; Ford, J.M.; Rivière, G.J.; et al. Effect of Food, Type of Food, and Time of Food Intake on Deferasirox Bioavailability: Recommendations for an Optimal Deferasirox Administration Regimen. *J Clin Pharmacol* 2008, 48, 428–435.
118. Möllmann, H.; Hochhaus, G.; Rohatagi, S.; Barth, J.; Derendorf, H. Pharmacokinetic/Pharmacodynamic Evaluation of Deflazacort in Comparison to Methylprednisolone and Prednisolone. *Pharm Res* 1995, 12, 1096–1100.
119. Rao, N.; Eller, N.; Arumugham, T.; Weir, S. The Effect of Food on the Relative Bioavailability of Deflazacort. *Eur J Drug Metab Pharmacokinet* 1996, 21, 241–245.

120. Drabant, S.; Balogh Nemes, K.; Horváth, V.; Tolokán, A.; Grézal, G.; Anttila, M.; Gachályi, B.; Kanerva, H.; Al-Behaisi, S.; Horvai, G.; et al. Influence of Food on the Oral Bioavailability of Deramciclane from Film-Coated Tablet in Healthy Male Volunteers. *Eur J Pharm Biopharm* 2004, 58, 689–695.
121. Yeh, G.C.; Deng, S.T.; Lo, C.Y.; Chiang, P.S.; Hsiong, C.H. Pharmacokinetics and Bioequivalence Study of a Generic Desloratadine Tablet Formulation in Healthy Male Volunteers. *Arzneimittelforschung* 2004, 54, 166–170.
122. Gupta, S.; Banfield, C.; Affrime, M.; Marbury, T.; Padhi, D.; Glue, P. Oral Bioavailability of Desloratadine Is Unaffected by Food. *Clin Pharmacokinet* 2002, 41, 7–12.
123. Agersø, H.; Larsen, L.S.; Riis, A.; Lövgren, U.; Karlsson, M.O.; Senderovitz, T. Pharmacokinetics and Renal Excretion of Desmopressin after Intravenous Administration to Healthy Subjects and Renally Impaired Patients. *Br J Clin Pharmacol* 2004, 58, 352–358.
124. Rittig S.; Jensen A. R.; Jensen K. T.; Pedersen E. B. Effect of Food Intake on the Pharmacokinetics and Antidiuretic Activity of Oral Desmopressin (DDAVP) in Hydrated Normal Subjects. *Clin Endocrinol* 1998, 48, 235–241.
125. Flanagan, R.; Johnston, A.; White, A.; Crome, P. Pharmacokinetics of Dextropropoxyphene and Nordextropropoxyphene in Young and Elderly Volunteers after Single and Multiple Dextropropoxyphene Dosage. *Br J Clin Pharmacol* 1989, 28, 463–469.
126. Chen, C.; Bujanover, S.; Kareht, S.; Rapoport, A.M. Differential Pharmacokinetics of Diclofenac Potassium for Oral Solution vs Immediate-Release Tablets from a Randomized Trial: Effect of Fed and Fasting Conditions. *Headache* 2015, 55, 265–275.
127. Melander, A.; Wählin, E. Enhancement of Dicoumarol Bioavailability by Concomitant Food Intake. *Eur J Clin Pharmacol* 1978, 14, 441–444.
128. Shyu, W.C.; Knupp, C.A.; Pittman, K.A.; Dunkle, L.; Barbhaiya, R.H. Food-induced Reduction in Bioavailability of Didanosine. *Clin Pharmacol Ther* 1991, 50, 503–507.
129. Singlas, E.; Taburet, A.M.; Lebas, F.B.; de Curzon, O.P.; Sobel, A.; Chauveau, P.; Viron, B.; Khayat, R.A.; Poignet, J.L.; Mignon, F.; et al. Didanosine Pharmacokinetics in Patients with Normal and Impaired Renal Function: Influence of Hemodialysis. *Antimicrob Agents Chemother* 1992, 36, 1519–1524.
130. Greenblatt, D.J.; Duhme, D.W.; Koch-Weser, J.; Smith Clinical, T.W. Bioavailability of Digoxin Tablets and Elixir in the Fasting and Postprandial States. *Clin Pharmacol Ther* 1974, 16, 444–448.
131. Trenk, D.; Wagner, F.; Sachs, W.; Jähnchen, E. Pharmacokinetic Characterization of the Antiarrhythmic Drug Diprafenone in Man. *Eur J Clin Pharmacol* 1989, 37, 313–316.
132. Koytchev, R.; Alken, R.G.; Mayer, O.; Smith, I.; Greenwood, M. Influence of Food on the Bioavailability and Some Pharmacokinetic Parameters of Diprafenone - A Novel Antiarrhythmic Agent. *Eur J Clin Pharmacol* 1996, 50, 315–319.
133. Lombardo, F.; Berellini, G.; Obach, R.S. Trend Analysis of a Database of Intravenous Pharmacokinetic Parameters in Humans for 1352 Drug Compounds. *Drug Metab Dispos* 2018, 46, 1466–1477.
134. Liedholm H.; Lidén A.; Kroon L.; Melander A.; Wählin-Boll E. Pharmacokinetics of Dixyrazine: Low Bioavailability, Improved by Food Intake. *Drug Nutr Interact* 1985, 3, 87–92.
135. Song, I.H.; Borland, J.; Savina, P.M.; Chen, S.; Patel, P.; Wajima, T.; Peppercorn, A.F.; Piscitelli, S.C. Pharmacokinetics of Single-Dose Dolutegravir in HIV-Seronegative Subjects With Moderate Hepatic Impairment Compared to Healthy Matched Controls. *Clin Pharmacol Drug Dev* 2013, 2, 342–348.
136. Weller S.; Chen S.; Borland J.; Savina P.; Wynne B.; Piscitelli S. C. Bioequivalence of a Dolutegravir, Abacavir, and Lamivudine Fixed-Dose Combination Tablet and the Effect of Food. *J Acquir Immune Defic Syndr* 2014, 66, 393–398.
137. Sanchez, R.I.; Fillgrove, K.L.; Yee, K.L.; Liang, Y.; Lu, B.; Tatavarti, A.; Liu, R.; Anderson, M.S.; Behm, M.O.; Fan, L.; et al. Characterisation of the Absorption, Distribution, Metabolism, Excretion and Mass Balance of Doravirine, a Non-Nucleoside Reverse Transcriptase Inhibitor in Humans. *Xenobiotica* 2019, 49, 422–432.
138. Behm, M.O.; Yee, K.L.; Liu, R.; Levine, V.; Panebianco, D.; Fackler, P. The Effect of Food on Doravirine Bioavailability: Results from Two Pharmacokinetic Studies in Healthy Subjects. *Clin Drug Investig* 2017, 37, 571–579.
139. Dubbelman, A.C.; Upthagrove, A.; Beijnen, J.H.; Marchetti, S.; Tan, E.; Krone, K.; Anand, S.; Schellens, J.H.M. Disposition and Metabolism of 14C-Dovitinib (TKI258), an Inhibitor of FGFR and VEGFR, after Oral Administration in Patients with Advanced Solid Tumors. *Cancer Chemother Pharmacol* 2012, 70, 653–663.
140. Sharma, S.; Britten, C.D.; Mortimer, J.; Kulkarni, S.; Quinlan, M.; Liu, A.; Scott, J.W.; George, D. The Effect of Formulation and Food Consumption on the Bioavailability of Dovitinib (TKI258) in Patients with Advanced Solid Tumors. *Cancer Chemother Pharmacol* 2014, 74, 867–874.
141. Deshmukh, P. v.; Badgujar, P.C.; Gatne, M.M. In-Vitro Red Blood Cell Partitioning of Doxycycline. *Indian J Pharmacol* 2009, 41, 173–175.
142. Agwuh, K.N.; MacGowan, A. Pharmacokinetics and Pharmacodynamics of the Tetracyclines Including Glycylcyclines. *J Antimicrob Chemother* 2006, 58, 256–265.
143. Welling, P.G.; Koch, P.A.; Lau, C.C.; Craig, W.A. Bioavailability of Tetracycline and Doxycycline in Fasted and Nonfasted Subjects. *Antimicrob Agents Chemother* 1977, 11, 462–469.
144. Naccarelli, G. v.; Wolbrette, D.L.; Levin, V.; Samii, S.; Banchs, J.E.; Penny-Peterson, E.; Gonzalez, M.D. Safety and Efficacy of Dronedarone in the Treatment of Atrial Fibrillation/Flutter. *Clin Med Insights Cardiol* 2011, 5, 103–119.
145. Knadler, M.P.; Lobo, E.; Chappell, J.; Bergstrom, R. Duloxetine: Clinical Pharmacokinetics and Drug Interactions. *Clin Pharmacokinet* 2011, 50, 281–294.

146. Rizea-Savu, S.; Duna, S.N.; Ghita, A.; Iordachescu, A.; Chirila, M. The Effect of Food on the Single-Dose Bioavailability and Tolerability of the Highest Marketed Strength of Duloxetine. *Clin Pharmacol Drug Dev* 2020, 9, 797–804.
147. Csajka, C.; Marzolini, C.; Fattinger, K.; Décosterd, L.A.; Fellay, J.; Telenti, A.; Biollaz, J.; Buclin, T. Population Pharmacokinetics and Effects of Efavirenz in Patients with Human Immunodeficiency Virus Infection. *Clin Pharmacol Ther* 2003, 73, 20–30.
148. Kaul, S.; Ji, P.; Lu, M.; Nguyen, K.L.; Shangguan, T.; Grasela, D. Bioavailability in Healthy Adults of Efavirenz Capsule Contents Mixed with a Small Amount of Food. *Am J Health Syst Pharm* 2010, 67, 217–222.
149. Deng, Y.; Madatian, A.; Wire, M.B.; Bowen, C.; Park, J.W.; Williams, D.; Peng, B.; Schubert, E.; Gorycki, F.; Levy, M.; et al. Metabolism and Disposition of Eltrombopag, an Oral, Nonpeptide Thrombopoietin Receptor Agonist, in Healthy Human Subjects. *Drug Metab Dispos* 2011, 39, 1734–1746.
150. Williams, D.D.; Peng, B.; Bailey, C.K.; Wire, M.B.; Deng, Y.; Park, J.W.; Collins, D.A.; Kapsi, S.G.; Jenkins, J.M. Effects of Food and Antacids on the Pharmacokinetics of Eltrombopag in Healthy Adult Subjects: Two Single-Dose, Open-Label, Randomized-Sequence, Crossover Studies. *Clin Ther* 2009, 31, 764–776.
151. Podany, A.T.; Scarsi, K.K.; Fletcher, C. v. Comparative Clinical Pharmacokinetics and Pharmacodynamics of HIV-1 Integrase Strand Transfer Inhibitors. *Clin Pharmacokinet* 2017, 56, 25–40.
152. Wolf, R.; Eberl, R.; Dunky, A.; Mertz, N.; Chang, T.; Goulet, J.R.; Latts, J. The Clinical Pharmacokinetics and Tolerance of Enoxacin in Healthy Volunteers. *J Antimicrob Chemother* 1984, 14, 63–69.
153. Zhang, Q.H.; Yang, J.; He, Y.; Liu, F.; Wang, J.P.; Davey, A.K. Food Effect on the Pharmacokinetics of Entecavir from Dispensible Tablets Following Oral Administration in Healthy Chinese Volunteers. *Arzneimittelforschung* 2010, 60, 640–644.
154. Yan, J.H.; Bifano, M.; Olsen, S.; Smith, R.A.; Zhang, D.; Grasela, D.M.; LaCreta, F. Entecavir Pharmacokinetics, Safety, and Tolerability after Multiple Ascending Doses in Healthy Subjects. *J Clin Pharmacol* 2006, 46, 1250–1258.
155. Tenero D.; Martin D.; Ilson B.; Jushchyshyn J.; Boike S.; Lundberg D.; Zariffa N.; Boyle D.; Jorkasky D. Pharmacokinetics of Intravenously and Orally Administered Eprosartan in Healthy Males: Absolute Bioavailability and Effect of Food. *Bio-pharm Drug Dispos* 1998, 19, 351–356.
156. White-Koning, M.; Civade, E.; Geoerger, B.; Thomas, F.; Deley, M.C. le; Hennebelle, I.; Delord, J.P.; Chatelut, E.; Vassal, G. Population Analysis of Erlotinib in Adults and Children Reveals Pharmacokinetic Characteristics as the Main Factor Explaining Tolerance Particularities in Children. *Clin Cancer Res* 2011, 17, 4862–4871.
157. Ling, J.; Fettner, S.; Lum, B.L.; Riek, M.; Rakhit, A. Effect of Food on the Pharmacokinetics of Erlotinib, an Orally Active Epidermal Growth Factor Receptor Tyrosine-Kinase Inhibitor, in Healthy Individuals. *Anticancer Drugs* 2008, 19, 209–216.
158. Sun, H.; Frassetto, L.A.; Huang, Y.; Benet, L.Z. Hepatic Clearance, but Not Gut Availability, of Erythromycin Is Altered in Patients with End-Stage Renal Disease. *Clin Pharmacol Ther* 2010, 87, 465–472.
159. Clayton D.; Leslie A. The Bioavailability of Erythromycin Stearate versus Enteric-Coated Erythromycin Base When Taken Immediately before and after Food. *J Int Med Res* 1981, 9, 470–477.
160. Bialer, M.; Soares-Da-Silva, P. Pharmacokinetics and Drug Interactions of Eslicarbazepine Acetate. *Epilepsia* 2012, 53, 935–946.
161. Fontes-Ribeiro, C.; MacEdo, T.; Nunes, T.; Neta, C.; Vasconcelos, T.; Cerdeira, R.; Lima, R.; Rocha, J.F.; Falcão, A.; Almeida, L.; et al. Dosage Form Proportionality and Food Effect of the Final Tablet Formulation of Eslicarbazepine Acetate: Randomized, Open-Label, Crossover, Single-Centre Study in Healthy Volunteers. *Drugs R D* 2008, 9, 447–454.
162. Maia, J.; Vaz-Da-Silva, M.; Almeida, L.; Falcão, A.; Silveira, P.; Guimarães, S.; Graziela, P.; Soares-Da-Silva, P. Effect of Food on the Pharmacokinetic Profile of Eslicarbazepine Acetate (BIA 2-093). *Drugs R D* 2005, 6, 201–206.
163. Gunnarsson, P.O.; Davidsson, T.; Andersson, S.B.; Backman, C.; Johansson, S.Å. Impairment of Estramustine Phosphate Absorption by Concurrent Intake of Milk and Food. *Eur J Clin Pharmacol* 1990, 38, 189–193.
164. Nguyen, P.T.T.; Parvez, M.M.; Kim, M.J.; Ho Lee, J.; Ahn, S.; Ghim, J.L.; Shin, J.G. Development of a Physiologically Based Pharmacokinetic Model of Ethionamide in the Pediatric Population by Integrating Flavin-Containing Monooxygenase 3 Maturation Changes Over Time. *J Clin Pharmacol* 2018, 58, 1347–1360.
165. Auclair, B.; Nix, D.E.; Adam, R.D.; James, G.T.; Peloquin, C.A. Pharmacokinetics of Ethionamide Administered under Fast-ing Conditions or with Orange Juice, Food, or Antacids. *Antimicrob Agents Chemother* 2001, 45, 810–814.
166. Sinkule J. A.; Hutson P.; Hayes F. A.; Etcubanas E.; Evans W. Pharmacokinetics of Etoposide (VP16) in Children and Adolescents with Refractory Solid Tumors. *Cancer Res* 1984, 44, 3109–3113.
167. Harvey, V.J.; Slevin, M.L.; Joel, S.P.; Johnston, A.; Wrigley, P.F.M. The Effect of Food and Concurrent Chemotherapy on the Bioavailability of Oral Etoposide. *Br J Cancer* 1985, 52, 363–367.
168. Takemoto, J.K.; Reynolds, J.K.; Remsberg, C.M.; Vega-Villa, K.R.; Davies, N.M. Clinical Pharmacokinetic and Pharmacody-namic Profile of Etoricoxib. *Clin Pharmacokinet* 2008, 47, 703–720.
169. Agrawal, N.G.B.; Porras, A.G.; Matthews, C.Z.; Rose, M.J.; Woolf, E.J.; Musser, B.J.; Dynder, A.L.; Mazina, K.E.; Lasseter, K.C.; Hunt, T.L.; et al. Single- and Multiple-Dose Pharmacokinetics of Etoricoxib, a Selective Inhibitor of Cyclooxygenase-2, in Man. *J Clin Pharmacol* 2003, 43, 268–276.
170. Cannady, E.A.; Aburub, A.; Ward, C.; Hinds, C.; Czeskis, B.; Ruterbories, K.; Suico, J.G.; Royalty, J.; Ortega, D.; Pack, B.W.; et al. Absolute Bioavailability of Evacetrapib in Healthy Subjects Determined by Simultaneous Administration of Oral Evacetrapib and Intravenous [13C8]-Evacetrapib as a Tracer. *J Labelled Comp Radiopharm* 2016, 59, 238–244.

171. Cannady, E.A.; Wang, M.D.; Friedrich, S.; Rehmel, J.L.F.; Yi, P.; Small, D.S.; Zhang, W.; Suico, J.G. Evacetrapib: In Vitro and Clinical Disposition, Metabolism, Excretion, and Assessment of Drug Interaction Potential with Strong CYP3A and CYP2C8 Inhibitors. *Pharmacol Res Perspect* 2015, 3.
172. Kovarik, J.M.; Hartmann, S.; Figueiredo, J.; Rordorf, C.; Golor, G.; Lison, A.; Budde, K.; Neumayer, H.H. Effect of Food on Everolimus Absorption: Quantification in Healthy Subjects and a Confirmatory Screening in Patients with Renal Transplants. *Pharmacotherapy* 2002, 22, 154–159.
173. Kirchner, G.I.; Meier-Wiedenbach, I.; Manns, M.P. Clinical Pharmacokinetics of Everolimus. *Clin Pharmacokinet* 2004, 43, 83–95.
174. Zhang, M.; Xu, C.; Ma, L.; Shamiyeh, E.; Yin, J.; von Moltke, L.L.; Smith, W.B. Effect of Food on the Bioavailability and Tolerability of the JAK2-Selective Inhibitor Fedratinib (SAR302503): Results from Two Phase I Studies in Healthy Volunteers. *Clin Pharmacol Drug Dev* 2015, 4, 315–321.
175. Yun, H.Y.; Eun, J.L.; Soo, Y.C.; Choi, S.O.; Hyung, K.K.; Kwon, J.T.; Kang, W.; Kwon, K. il The Effects of Food on the Bioavailability of Fenofibrate Administered Orally in Healthy Volunteers via Sustained-Release Capsule. *Clin Pharmacokinet* 2006, 45, 425–432.
176. Back, H. moon; Song, B.; Pradhan, S.; Chae, J. woo; Han, N.; Kang, W.; Chang, M.J.; Zheng, J.; Kwon, K. il; Karlsson, M.O.; et al. A Mechanism-Based Pharmacokinetic Model of Fenofibrate for Explaining Increased Drug Absorption after Food Consumption. *BMC Pharmacol Toxicol* 2018, 19.
177. Weber, R.; McCoy, C.; Ziemniak, J.; Frederickson, E.; Goldberg, L.; Murphy, M. Pharmacokinetic and Pharmacodynamic Properties of Intravenous Fenoldopam, a Dopamine1-receptor Agonist, in Hypertensive Patients. *Br J Clin Pharmacol* 1988, 25, 17–21.
178. Clancy, A.; Locke-Haydon, J.; Cregeen, R.J.; Ireson, M.; Ziemniak, J. Effect of Concomitant Food Intake on Absorption Kinetics of Fenoldopam (SK&F 82526) in Healthy Volunteers. *Eur J Clin Pharmacol* 1987, 32, 103–106.
179. Tarral, A.; Blesson, S.; Mordt, O.V.; Torreele, E.; Sassella, D.; Bray, M.A.; Hovsepian, L.; Evène, E.; Gualano, V.; Felices, M.; et al. Determination of an Optimal Dosing Regimen for Fexinidazole, a Novel Oral Drug for the Treatment of Human African Trypanosomiasis: First-in-Human Studies. *Clin Pharmacokinet* 2014, 53, 565–580.
180. Dutta, S.; Zhang, Y.; Daszkowski, D.J.; Granneman, G.R.; Verlinden, M. Single- and Multiple-Dose Pharmacokinetics of Fiduxosin under Nonfasting Conditions in Healthy Male Subjects. *J Clin Pharmacol* 2002, 42, 540–546.
181. Dutta, S.; Zhang, Y.; Granneman, G.R.; Verlinden, M. Effect of Food on the Pharmacokinetics of Fiduxosin in Healthy Male Subjects. *Eur J Drug Metab Pharmacokinet* 2002, 27, 49–52.
182. Tjandra-Maga, T.; Verbesselt, R.; van Hecken, A.; Mullie, A.; de Schepper, P. Flecainide: Single and Multiple Oral Dose Kinetics, Absolute Bioavailability and Effect of Food and Antacid in Man. *Br J Clin Pharmacol* 1986, 22, 309–316.
183. Michiels M.; Hendriks R.; Heykants J.; Bossche H. V. D. The Pharmacokinetics of Mebendazole and Flubendazole in Animals and Man. *Arch Int Pharmacodyn Ther* 1982, 256, 180–191.
184. Zimmermann, T.; Yeates, R.A.; Laufen, H.; Pfaff, G.; Wildfeuer, A. Influence of Concomitant Food Intake on the Oral Absorption of Two Triazole Antifungal Agents, Itraconazole and Fluconazole. *Eur J Clin Pharmacol* . 1994, 46, 147–150.
185. Orlando, R.; de Martin, S.; Andrighetto, L.; Floreani, M.; Palatini, P. Fluvoxamine Pharmacokinetics in Healthy Elderly Subjects and Elderly Patients with Chronic Heart Failure. *Br J Clin Pharmacol* 2010, 69, 279–286.
186. van Harten, J.; van Bommel, P.; Dobrinska, M.R.; Ferguson, R.K.; Raghoobar, M. Bioavailability of Fluvoxamine given with and without Food. *Biopharm Drug Dispos* 1991, 12, 571–576.
187. Fosamprenavir Monograph Available online: [https://pdf.hres.ca/dpd\\_pm/00037886.PDF](https://pdf.hres.ca/dpd_pm/00037886.PDF) (accessed on 29 May 2021).
188. Colon-Gonzalez, F.; Kraft, W.K. Pharmacokinetic Evaluation of Fosaprepitant Dimeglumine. *Expert Opin Drug Metab Toxicol* 2010, 6, 1277–1286.
189. Baluom, M.; Grossbard, E.B.; Mant, T.; Lau, D.T.W. Pharmacokinetics of Fostamatinib, a Spleen Tyrosine Kinase (SYK) Inhibitor, in Healthy Human Subjects Following Single and Multiple Oral Dosing in Three Phase I Studies. *Br J Clin Pharmacol* 2013, 76, 78–88.
190. Flanagan, T.; Martin, P.; Gillen, M.; Mathews, D.; Lisbon, E.; Kruusmägi, M. Effects of Ranitidine (Antacid), Food, and Formulation on the Pharmacokinetics of Fostamatinib: Results from Five Phase I Clinical Studies. *Eur J Clin Pharmacol* 2017, 73, 185–195.
191. Larsen, M.S.; Frølund, S.; Nøhr, M.K.; Nielsen, C.U.; Garmer, M.; Kreilgaard, M.; Holm, R. In Vivo and in Vitro Evaluations of Intestinal Gabapentin Absorption: Effect of Dose and Inhibitors on Carrier-Mediated Transport. *Pharm Res* 2015, 32, 898–909.
192. Bockbrader, H.N.; Wesche, D.; Miller, R.; Chapel, S.; Janiczek, N.; Burger, P. A Comparison of the Pharmacokinetics and Pharmacodynamics of Pregabalin and Gabapentin. *Clin Pharmacokinet* 2010, 49, 661–669.
193. Elwes, R.D.C.; Binnie, C.D. Clinical Pharmacokinetics of Newer Antiepileptic Drugs: Lamotrigine, Vigabatrin, Gabapentin and Oxcarbazepine. *Clin Pharmacokinet* 1996, 30, 403–415.
194. Lavelle, J.; Follansbee, S.; Trapnell, C.B.; Buhles, W.C.; Griffy, K.G.; Jung, D.; Dorr, A.; Connor, J. Effect of Food on the Relative Bioavailability of Oral Ganciclovir. *J Clin Pharmacol* 1996, 36, 238–241.
195. Mignot, A.; Guillaume, M.; Göhler, K.; Stahlberg, H.J. Oral Bioavailability of Gatifloxacin in Healthy Volunteers under Fasting and Fed Conditions. *Chemotherapy* 2002, 48, 111–115.

196. Swaisland, H.C.; Smith, R.P.; Laight, A.; Kerr, D.J.; Ranson, M.; Wilder-Smith, C.H.; Duvauchelle, T. Single-Dose Clinical Pharmacokinetic Studies of Gefitinib. *Clin Pharmacokinet* 2005, 44, 1165–1177.
197. Vadlapatla, R.K.; Vadlapudi, A.D.; Kwatra, D.; Pal, D.; Mitra, A.K. Differential Effect of P-Gp and MRP2 on Cellular Translocation of Gemifloxacin. *Int J Pharm* 2011, 420, 26–33.
198. Allen, A.; Bygate, E.; Vousden, M.; Oliver, S.; Johnson, M.; Ward, C.; Cheon, A.J.; Youn Sung Choo; Kim, I.C. Multiple-Dose Pharmacokinetics and Tolerability of Gemifloxacin Administered Orally to Healthy Volunteers. *Antimicrob Agents Chemother* 2001, 45, 540–545.
199. Tay, L.K.; Sciacca, M.A.; Sostrin, M.B.; Farnen, R.H.; Pittman, K.A. Effect of Food on the Bioavailability of Gepirone in Humans. *J Clin Pharmacol* 1993, 33, 631–635.
200. Aa, L.; Fei, F.; Tan, Z.; Aa, J.; Wang, G.; Liu, C. The Pharmacokinetics Study of Ginkgolide A, B and the Effect of Food on Bioavailability after Oral Administration of Ginkgolide Extracts in Beagle Dogs. *Biomed Chromatogr* 2018, 32.
201. Huang, P.; Zhang, L.; Chai, C.; Qian, X.C.; Li, W.; Li, J.S.; Di, L.Q.; Cai, B.C. Effects of Food and Gender on the Pharmacokinetics of Ginkgolides A, B, C and Bilobalide in Rats after Oral Dosing with Ginkgo Terpene Lactones Extract. *J Pharm Biomed Anal* 2014, 100, 138–144.
202. Shaik, N.; Hee, B.; Liang, Y.; LaBadie, R.R. Absolute Oral Bioavailability of Glasdegib (PF-04449913), a Smoothened Inhibitor, in Randomized Healthy Volunteers. *Int J Pharm* 2019, 8, 895–902.
203. Giri, N.; Lam, L.H.; LaBadie, R.R.; Krzyzaniak, J.F.; Jiang, H.; Hee, B.; Liang, Y.; Shaik, M.N. Evaluation of the Effect of New Formulation, Food, or a Proton Pump Inhibitor on the Relative Bioavailability of the Smoothened Inhibitor Glasdegib (PF-04449913) in Healthy Volunteers. *Cancer Chemother Pharmacol* 2017, 80, 1249–1260.
204. Marathe P. H.; Arnold M. E.; Meeker J.; Greene D. S.; Barbhuiya R. H. Pharmacokinetics and Bioavailability of a Metformin/Glyburide Tablet Administered Alone and with Food. *J Clin Pharmacol* 2000, 40, 1494–1502.
205. Lin, C.; Lim, J.; Digiore, C.; Gural, R.; Symchowicz, B. Comparative Bioavailability of a Microsize and Ultramicrosize Griseofulvin Formulation in Man. *J Int Med Res* 1982, 10, 274–277.
206. Ogunbona, F.A.; Smith, I.F.; Olawoye, O.S. Fat Contents of Meals and Bioavailability of Griseofulvin in Man. *J Pharm Pharmacol* 1985, 37, 283–284.
207. Cass, L.M.; Moore, K.H.P.; Dallow, N.S.; Jones, A.E.; Sisson, J.R.; Prince, W.T. The Bioavailability of the Novel Nonnucleoside Reverse Transcriptase Inhibitor GW420867X Is Unaffected by Food in Healthy Male Volunteers. *J Clin Pharmacol* 2001, 41, 528–535.
208. Karbwang, J.; Bangchang, K.N. Clinical Pharmacokinetics of Halofantrine. *Clin Pharmacokinet* 1994, 27, 104–119.
209. Milton, K.; Edwards, G.; Ward, S.; Orme, M.; Breckenridge, A. Pharmacokinetics of Halofantrine in Man: Effects of Food and Dose Size. *Br J Clin Pharmacol* 1989, 28, 71–77.
210. Ludden, T.M.; Shepherd, A.M.M.; McNay, J.L.; Lin, M.S. Hydralazine Kinetics in Hypertensive Patients after Intravenous Administration. *Clin Pharmacol Ther* 1980, 28, 736–742.
211. Melander, A.; Danielson, K.; Hanson, A.; Rudell, B.; Schersten, B.; Thulin, T.; Wahlin, E. Enhancement of Hydralazine Bioavailability by Food. *Clin Pharmacol Ther* 1977, 22, 104–107.
212. Melhem, M.R.; Rubino, C.M.; Farr, S.J.; Robinson, C.Y. Population Pharmacokinetic Analysis for Hydrocodone Following the Administration of Hydrocodone Bitartrate Extended-Release Capsules. *Clin Pharmacokinet* 2013, 52, 907–917.
213. Pham, P.C.; Khaing, K.; Sievers, T.M.; Pham, P.M.; Miller, J.M.; Pham, S. v.; Pham, P.A.; Pham, P.T. 2017 Update on Pain Management in Patients with Chronic Kidney Disease. *Clin Kidney J* 2017, 10, 688–697.
214. Bond, M.; Rabinovich-Guilatt, L.; Selim, S.; Darwish, M.; Tracewell, W.; Robertson, P.; Yang, R.; Malamut, R.; Colucci, P.; Ducharme, M.P.; et al. Effect of Food on the Pharmacokinetics of Single- and Multiple-Dose Hydrocodone Extended Release in Healthy Subjects. *Clin Drug Investig* 2017, 37, 1153–1163.
215. Scheers, E.; Leclercq, L.; de Jong, J.; Bode, N.; Bockx, M.; Laenen, A.; Cuyckens, F.; Skee, D.; Murphy, J.; Sukbuntherng, J.; et al. Absorption, Metabolism, and Excretion of Oral <sup>14</sup>C Radiolabeled Ibrutinib: An Open-Label, Phase I, Single-Dose Study in Healthy Men. *Drug Metab Dispos* 2015, 43, 289–297.
216. de Jong, J.; Sukbuntherng, J.; Skee, D.; Murphy, J.; O'Brien, S.; Byrd, J.C.; James, D.; Hellemans, P.; Loury, D.J.; Jiao, J.; et al. The Effect of Food on the Pharmacokinetics of Oral Ibrutinib in Healthy Participants and Patients with Chronic Lymphocytic Leukemia. *Cancer Chemother Pharmacol* 2015, 75, 907–916.
217. Chen, J.; Liu, D.; Zheng, X.; Zhao, Q.; Jiang, J.; Hu, P. Relative Contributions of the Major Human CYP450 to the Metabolism of Icotinib and Its Implication in Prediction of Drug-Drug Interaction between Icotinib and CYP3A4 Inhibitors/Inducers Using Physiologically Based Pharmacokinetic Modeling. *Expert Opin Drug Metab Toxicol* 2015, 11, 857–868.
218. Liu, D.; Jiang, J.; Zhang, L.; Tan, F.; Wang, Y.; Zhang, D.; Hu, P. Clinical Pharmacokinetics of Icotinib, an Anti-Cancer Drug: Evaluation of Dose Proportionality, Food Effect, and Tolerability in Healthy Subjects. *Cancer Chemother Pharmacol* 2014, 73, 721–727.
219. Ciraulo, D.A.; Barnhill, J.G.; Jaffe, J.H. Clinical Pharmacokinetics of Imipramine and Desipramine in Alcoholics and Normal Volunteers. *Clin Pharmacol Ther* 1988, 43, 509–518.
220. Abernethy, D.R.; Divoll, M.; Greenblatt, D.J.; Harmatz, J.S.; Shader, R.I. Absolute Bioavailability of Imipramine: Influence of Food. *Psychopharmacology* 1984, 83, 104–106.
221. Engel, A.L.; Holt, G.E.; Lu, H. The Pharmacokinetics of Toll-like Receptor Agonists and the Impact on the Immune System. *Expert Rev Clin Pharmacol* 2011, 4, 275–289.

222. Harrison, L.I.; Astry, C.; Kumar, S.; Yunis, C. Pharmacokinetics of 852A, an Imidazoquinoline Toll-like Receptor 7-Specific Agonist, Following Intravenous, Subcutaneous, and Oral Administrations in Humans. *J Clin Pharmacol* 2007, 47, 962–969.
223. Hsu, A.; Granneman, G.R.; Cao, G.; Carothers, L.; Japour, A.; El-Shourbagy, T.; Dennis, S.; Berg, J.; Erdman, K.; Leonard, J.M.; et al. Pharmacokinetic Interaction between Ritonavir and Indinavir in Healthy Volunteers. *Antimicrob Agents Chemother* 1998, 42, 2784–2791.
224. Yeh, K.C.; Deutsch, P.J.; Haddix, H.; Hesney, M.; Hoagland, V.; Ju, W.D.; Justice, S.J.; Osborne, B.; Sterrett, A.T.; Stone, J.A.; et al. Single-Dose Pharmacokinetics of Indinavir and the Effect of Food. *Antimicrob Agents Chemother* 1998, 42, 332–338.
225. Lucas, S. The Pharmacology of Indomethacin. *Headache* 2016, 56, 436–446.
226. Ogata, H.; Aoyagi, N.; Kaniwa, N. Effects of Food on Bioavailability of Two Indomethacin Capsules Containing Different Sizes of Particles. *Chem Pharm Bull* 1990, 38, 1338–1340.
227. Kim, S.H.; Lee, M.G. Pharmacokinetics of Ipriflavone, an Isoflavone Derivative, after Intravenous and Oral Administration to Rats: Hepatic and Intestinal First-Pass Effects. *Life Sci* 2002, 70, 1299–1315.
228. Zent, C.; Smith, P. Study of the Effect of Concomitant Food on the Bioavailability of Rifampicin, Isoniazid and Pyrazinamide. *Tuber Lung Dis* 1995, 76, 109–113.
229. Morrison, R. Determination of the Partitioning, Stability, and Metabolite Formation of Isosorbide Dinitrate in Human and Rat Blood Using an Improved Gas - Liquid Chromatographic Assay. *J Chromatogr* 1998, 308, 153–164.
230. Kosoglou, T.; Kazierad, D.J.; Schentag, J.J.; Patrick, J.E.; Heimark, L.; Radwanski, E.; Christopher, D.; Flannery, B.E.; Afrime, M.B. Effect of Food on the Oral Bioavailability of Isosorbide-5-Mononitrate Administered as an Extended-Release Tablet. *J Clin Pharmacol* 1995, 35, 151–158.
231. Nulman, I.; Berkovitch, M.; Klein, J.; Pastuszak, A.; Lester, R.S.; Shear, N.; Koren, G. Steady-State Pharmacokinetics of Isotretinoin and Its 4-Oxo Metabolite: Implications for Fetal Safety. *J Clin Pharmacol* 1998, 38, 926–930.
232. Garcia, L.P.; Janzén, D.; Kanebratt, K.P.; Ericsson, H.; Lennernäs, H.; Lundahl, A. Physiologically Based Pharmacokinetic Model of Itraconazole and Two of Its Metabolites to Improve the Predictions and the Mechanistic Understanding of CYP3A4 Drug-Drug Interactions. *Drug Metab Dispos* 2018, 46, 1420–1433.
233. Zimmermann, T.; Yeates, R.A.; Laufen, H.; Pfaff, G.; Wildfeuer, A. Influence of Concomitant Food Intake on the Oral Absorption of Two Triazole Antifungal Agents, Itraconazole and Fluconazole. *Eur J Clin Pharmacol* 1994, 46, 147–150.
234. Duthaler, U.; Suenderhauf, C.; Karlsson, M.O.; Hussner, J.; Meyer zu Schwabedissen, H.; Krähenbühl, S.; Hammann, F. Population Pharmacokinetics of Oral Ivermectin in Venous Plasma and Dried Blood Spots in Healthy Volunteers. *Br J Clin Pharmacol* 2019, 85, 626–633.
235. Guzzo, C.A.; Furtek, C.I.; Porras, A.G.; Chen, C.; Tipping, R.; Clineschmidt, C.M.; Sciberras, D.G.; Hsieh, J.Y.K.; Lasseter, K.C. Safety, Tolerability, and Pharmacokinetics of Escalating High Doses of Ivermectin in Healthy Adult Subjects. *J Clin Pharmacol* 2002, 42, 1122–1133.
236. Gupta, N.; Hanley, M.J.; Xia, C.; Labotka, R.; Harvey, R.D.; Venkatakrishnan, K. Clinical Pharmacology of Ixazomib: The First Oral Proteasome Inhibitor. *Clin Pharmacokinet* 2019, 58, 431–449.
237. Gupta, N.; Hanley, M.J.; Venkatakrishnan, K.; Perez, R.; Norris, R.E.; Nemunaitis, J.; Yang, H.; Qian, M.G.; Falchhook, G.; Labotka, R.; et al. Pharmacokinetics of Ixazomib, an Oral Proteasome Inhibitor, in Solid Tumour Patients with Moderate or Severe Hepatic Impairment. *Br J Clin Pharmacol* 2016, 82, 728–738.
238. Gupta, N.; Hanley, M.J.; Venkatakrishnan, K.; Wang, B.; Sharma, S.; Bessudo, A.; Hui, A.M.; Nemunaitis, J. The Effect of a High-Fat Meal on the Pharmacokinetics of Ixazomib, an Oral Proteasome Inhibitor, in Patients With Advanced Solid Tumors or Lymphoma. *Journal of Clinical Pharmacology* 2016, 56, 1288–1295.
239. Mannisto, P.T.; Mantyla, R.; Nykanen, S.; Lamminsivu, U.; Ottoila, P. Impairing Effect of Food on Ketoconazole Absorption. *Antimicrob Agents Chemother* 1982, 21, 730–733.
240. Daneshmend, T.; Roberts, C. The Influence of Food on the Oral and Intravenous Pharmacokinetics of a High Clearance Drug: A Study with Labetalol. *Br J Clin Pharmacol* 1982, 14, 73–78.
241. Cawello, W. Clinical Pharmacokinetic and Pharmacodynamic Profile of Lacosamide. *Clin Pharmacokinet* 2015, 54, 901–914.
242. Naderer, O.; Jones, L.S.; Zhu, J.; Coffin, M.D.; Kurtinecz, M.; Dumont, E. The Effect of Food and Formulation on the Pharmacokinetics, Safety, and Tolerability of GSK1322322 in Healthy Volunteers. *Clin Pharmacol Drug Dev* 2015, 4, 49–55.
243. Burris, H.A.; Taylor, C.W.; Jones, S.F.; Koch, K.M.; Versola, M.J.; Arya, N.; Fleming, R.A.; Smith, D.A.; Pandite, L.; Spector, N.; et al. A Phase I and Pharmacokinetic Study of Oral Lapatinib Administered Once or Twice Daily in Patients with Solid Malignancies. *Clin Cancer Res* 2009, 15, 6702–6708.
244. Lewis, L.D.; Koch, K.M.; Reddy, N.J.; Cohen, R.B.; Lewis, N.L.; Whitehead, B.; Mackay, K.; Stead, A.; Beelen, A.P. Effects of Food on the Relative Bioavailability of Lapatinib in Cancer Patients. *J Clin Oncol* 2009, 27, 1191–1196.
245. Chen, N.; Zhou, S.; Palmisano, M. Clinical Pharmacokinetics and Pharmacodynamics of Lenalidomide. *Clin Pharmacokinet* 2017, 56, 139–152.
246. Gupta, A.; Jarzab, B.; Capdevila, J.; Shumaker, R.; Hussein, Z. Population Pharmacokinetic Analysis of Lenvatinib in Healthy Subjects and Patients with Cancer. *Br J Clin Pharmacol* 2016, 81, 1124–1133.
247. Shen, Z.; Rowlings, C.; Kerr, B.; Hingorani, V.; Manhard, K.; Quart, B.; Yeh, L.T.; Storgard, C. Pharmacokinetics, Pharmacodynamics, and Safety of Lesinurad, a Selective Uric Acid Reabsorption Inhibitor, in Healthy Adult Males. *Drug Des Devel Ther* 2015, 9, 3423–3434.

248. Shen, Z.; Lee, C.A.; Valdez, S.; Yang, X.; Wilson, D.M.; Flanagan, T.; Gillen, M. Effects of Food and Antacids on Pharmacokinetics and Pharmacodynamics of Lesinurad, a Selective Urate Reabsorption Inhibitor. *Clin Pharmacol Drug Dev* 2019, 8, 647–656.
249. Kamimura, H.; Ito, S.; Chijiwa, H.; Okuzono, T.; Ishiguro, T.; Yamamoto, Y.; Nishinoaki, S.; Ninomiya, S.I.; Mitsui, M.; Kalgutkar, A.S.; et al. Simulation of Human Plasma Concentration–Time Profiles of the Partial Glucokinase Activator PF-04937319 and Its Disproportionate N-Demethylated Metabolite Using Humanized Chimeric Mice and Semi-Physiological Pharmacokinetic Modeling. *Xenobiotica* 2017, 47, 382–393.
250. Niazi, M.; Skrtic, S.; Ruth, M.; Holmberg, A.A. Pharmacokinetic Profile of Lesogaberan (AZD3355) in Healthy Subjects: A Novel GABAB-Receptor Agonist Reflux Inhibitor. *Drugs R D* 2011, 11, 77–83.
251. Patsalos, P.N. Pharmacokinetic Profile of Levetiracetam toward Ideal Characteristics. *Pharmacol Ther* 2000, 85, 77–85.
252. Fish, D.N.; Chow, A.T. The Clinical Pharmacokinetics of Levofloxacin. *Clin Pharmacokinet* 1997, 32, 101–119.
253. Kodaira, H.; Kusuhara, H.; Fujita, T.; Ushiki, J.; Fuse, E.; Sugiyama, Y. Quantitative Evaluation of the Impact of Active Efflux by P-Glycoprotein and Breast Cancer Resistance Protein at the Blood-Brain Barrier on the Predictability of the Unbound Concentrations of Drugs in the Brain Using Cerebrospinal Fluid Concentration as a Surrogate. *J Pharmacol Exp Ther* 2011, 339, 935–944.
254. Lee, L.J.; Hafkin, B.; Lee, I. der; Hoh, J.; Dix, R. Effects of Food and Sucralfate on a Single Oral Dose of 500 Milligrams of Levofloxacin in Healthy Subjects. *Antimicrob Agents Chemother* 1997, 41, 2196–2200.
255. Stalker, D.J.; Jungbluth, G.L. Clinical Pharmacokinetics of Linezolid, a Novel Oxazolidinone Antibacterial. *Clin Pharmacokinet* 2003, 42, 1129–1140.
256. Welshman, I.R.; Sisson, T.A.; Jungbluth, G.L.; Stalker, D.J.; Hopkins, N.K. Linezolid Absolute Bioavailability and the Effect of Food on Oral Bioavailability. *Biopharm Drug Dispos* 2001, 22, 91–97.
257. Xiong, H.; Chiu, Y.L.; Ricker, J.L.; LoRusso, P. Results of a Phase 1, Randomized Study Evaluating the Effects of Food and Diurnal Variation on the Pharmacokinetics of Linifanib. *Cancer Chemother Pharmacol* 2014, 74, 55–61.
258. Mojaverian, P.; Rocci, M.L.; Vlasses, P.H.; Hoholick, C.; Clementi, R.A.; Ferguson, R.K. Effect of Food on the Bioavailability of Lisinopril, a Nonsulphydryl Angiotensin-converting Enzyme Inhibitor. *J Pharm Sci* 1986, 75, 395–397.
259. Beermann, B. Pharmacokinetics of Lisinopril. *Am J Med* 1988, 85, 25–30.
260. Zhu, Y.; Statkevich, P.; Cutler, D.L. Effect of Food on the Pharmacokinetics of Lonafernib (SCH 66336) Following Single and Multiple Doses. *Int J Clin Pharmacol Ther* 2007, 45, 539–547.
261. Morgillo, F.; Lee, H.Y. Lonafernib in Cancer Therapy. *Expert Opin Investig Drugs* 2006, 15, 709–719.
262. van Kampen, J.J.A.; Reedijk, M.L.; Burgers, P.C.; Dekker, L.J.M.; Hartwig, N.G.; van der Ende, I.E.; de Groot, R.; Osterhaus, A.D.M.E.; Burger, D.M.; Luider, T.M.; et al. Ultra-Fast Analysis of Plasma and Intracellular Levels of HIV Protease Inhibitors in Children: A Clinical Application of MALDI Mass Spectrometry. *PLoS ONE* 2010, 5.
263. Klein, C.E.; Chiu, Y.L.; Awni, W.; Zhu, T.; Heuser, R.S.; Doan, T.; Breitenbach, J.; Morris, J.B.; Brun, S.C.; Hanna, G.J. The Tablet Formulation of Lopinavir/Ritonavir Provides Similar Bioavailability to the Soft-Gelatin Capsule Formulation with Less Pharmacokinetic Variability and Diminished Food Effect. *J Acquir Immune Defic Syndr* 2007, 44, 401–410.
264. Haria, M.; Fitton, A.; Peters, D.H. Loratadine: A Reappraisal of Its Pharmacological Properties and Therapeutic Use in Allergic Disorders. *Drugs* 1994, 48, 617–637.
265. Nomeir, A.A.; Mojaverian, P.; Kosoglou, T.; Affrime, M.B.; Nezamis, J.; Radwanski, E.; Lin, C.C.; Cayen, M.N. Influence of Food on the Oral Bioavailability of Loratadine and Pseudoephedrine from Extended-Release Tablets in Healthy Volunteers. *J Clin Pharmacol* 1996, 36, 923–930.
266. Nguyen, H.Q.; Lin, J.; Kimoto, E.; Callegari, E.; Tse, S.; Obach, R.S. Prediction of Losartan-Active Carboxylic Acid Metabolite Exposure Following Losartan Administration Using Static and Physiologically Based Pharmacokinetic Models. *J Pharm Sci* 2017, 106, 2758–2770.
267. Borrmann, S.; Sallas, W.M.; Machevo, S.; González, R.; Björkman, A.; Mårtensson, A.; Hamel, M.; Juma, E.; Peshu, J.; Ogutu, B.; et al. The Effect of Food Consumption on Lumefantrine Bioavailability in African Children Receiving Artemether-Lumefantrine Crushed or Dispersible Tablets (Coartem®) for Acute Uncomplicated Plasmodium Falciparum Malaria. *Trop Med Int Health* 2010, 15, 434–441.
268. Greenberg, W.M.; Citrome, L. Pharmacokinetics and Pharmacodynamics of Lurasidone Hydrochloride, a Second-Generation Antipsychotic: A Systematic Review of the Published Literature. *Clin Pharmacokinet* 2017, 56, 493–503.
269. Preskorn, S.; Ereshefsky, L.; Chiu, Y.Y.; Poola, N.; Loebel, A. Effect of Food on the Pharmacokinetics of Lurasidone: Results of Two Randomized, Open-Label, Crossover Studies. *Hum Psychopharmacol* 2013, 28, 495–505.
270. Rosillon, D.; Stockis, A.; Poli, G.; Acerbi, D.; Lins, R.; Jeanbaptiste, B. Food Effect on the Oral Bioavailability of Manidipine: Single Dose, Randomized, Crossover Study in Healthy Male Subjects. *Eur J Drug Metab Pharmacokinet* 1998, 23, 197–202.
271. Stockis, A.; Gengler, C.; Goethals, F.; Jeanbaptiste, B.; Lens, S.; Poli, G.; Acerbi, D. Single Oral Dose Pharmacokinetic Interaction Study of Manidipine and Delapril in Healthy Volunteers. *Arzneimittelforschung* 2003, 53, 627–634.
272. Abel, S.; Russell, D.; Whitlock, L.A.; Ridgway, C.E.; Nedderman, A.N.R.; Walker, D.K. Assessment of the Absorption, Metabolism and Absolute Bioavailability of Maraviroc in Healthy Male Subjects. *Br J Clin Pharmacol* 2008, 65, 60–67.
273. Wendling, T.; Ogungbenro, K.; Pigeolet, E.; Dumitras, S.; Woessner, R.; Aarons, L. Model-Based Evaluation of the Impact of Formulation and Food Intake on the Complex Oral Absorption of Mavoglurant in Healthy Subjects. *Pharm Res* 2015, 32, 1764–1778.

274. Müntst, G.J.; Karlaganis, G.; Bircher, J. Plasma Concentrations of Mebendazole during Treatment of Echinococcosis - Preliminary Results. *Eur J Clin Pharmacol* 1980, 17, 375–378.
275. Dawson, M.; Braithwaite, P.; Roberts, M.; Watson, T. The Pharmacokinetics and Bioavailability of a Tracer Dose of [3H]-Mebendazole in Man. *Br J Clin Pharmacol* 1985, 19, 79–86.
276. Crevoisier, C.; Handschin, J.; Barré, J.; Roumenov, D.; Kleinbloesem, C. Food Increases the Bioavailability of Mefloquine. *European Journal of Clinical Pharmacology* 1997, 53, 135–139.
277. Liston, D.R.; Davis, M. Clinically Relevant Concentrations of Anticancer Drugs: A Guide for Nonclinical Studies. *Clin Cancer Res* 2017, 23, 3489–3498.
278. Deschamps, B.; Musaji, N.; Gillespie, J.A. Food Effect on the Bioavailability of Two Distinct Formulations of Megestrol Acetate Oral Suspension. *Int J Nanomedicine* 2009, 4, 185–192.
279. Reece, P.A.; Kotasek, D.; Morris, R.G.; Dale, B.M.; Sage, R.E. The Effect of Food on Oral Melphalan Absorption. *Cancer Chemother Pharmacol* 1986, 16, 194–197.
280. Uematsu, T.; Nagashima, S.; Niwa, M.; Kohno, K.I.; Sassa, T.; Ishii, M.; Tomono, Y.; Yamato, C.; Kanamaru, M. Effect of Dietary Fat Content on Oral Bioavailability of Menatretrenone in Humans. *J Pharm Sci* 1996, 85, 1012–1016.
281. Graham, G.G.; Punt, J.; Arora, M.; Day, R.O.; Doogue, M.P.; Duong, J.K.; Furlong, T.J.; Greenfield, J.R.; Greenup, L.C.; Kirkpatrick, C.M.; et al. Clinical Pharmacokinetics of Metformin. *Clin Pharmacokinet* 2011, 50, 81–98.
282. Marathe P. H.; Arnold M. E.; Meeker J.; Greene D. S.; Barbhuiya R. H. Pharmacokinetics and Bioavailability of a Metformin/Glyburide Tablet Administered Alone and with Food. *J Clin Pharmacol* 2000, 40, 1494–1502.
283. Kozloski, G.D.; de Vito, J.M.; Kisicki, J.C.; Johnson, J.B. The Effect of Food on the Absorption of Methotrexate Sodium Tablets in Healthy Volunteers. *Arthritis Rheum* 1992, 35, 761–764.
284. Kimko, H.C.; Cross, J.T.; Abernethy, D.R. Pharmacokinetics and Clinical Effectiveness of Methylphenidate. *Clin Pharmacokinet* 1999, 37, 457–470.
285. Midha, K.K.; McKay, G.; Rawson, M.J.; Korchinski, E.D.; Hubbard, J.W. Effects of Food on the Pharmacokinetics of Methylphenidate. *Pharmaceutical Research* 2001, 18, 1185–1189.
286. Vergin, H.; Fisch, U.; Mahr, G.; Winterhalter, B. Analysis of Formulation and Food Effect on the Absorption of Metaclopramide. *Int J Clin Pharmacol Ther* 2002, 40, 169–174.
287. Bateman, D.N. Clinical Pharmacokinetics of Metoclopramide. *Clin Pharmacokinet* 1983, 8, 523–529.
288. Melander, A.; Danielson, K.; Scherstén, B.; Wåhlin, E. Enhancement of the Bioavailability of Propranolol and Metoprolol by Food. *Clin Pharmacol Ther* 1977, 22, 108–112.
289. Yoon, I.S.; Choi, M.K.; Kim, J.S.; Shim, C.K.; Chung, S.J.; Kim, D.D. Pharmacokinetics and First-Pass Elimination of Metoprolol in Rats: Contribution of Intestinal First-Pass Extraction to Low Bioavailability of Metoprolol. *Xenobiotica* 2011, 41, 243–251.
290. McCafferty, E.H.; Scott, L.J. Migalastat: A Review in Fabry Disease. *Drugs* 2019, 79, 543–554.
291. Johnson, F.K.; Mudd, P.N.; Janmohamed, S.G. Relative Bioavailability and the Effect of Meal Type and Timing on the Pharmacokinetics of Migalastat in Healthy Volunteers. *Clin Pharmacol Drug Dev* 2015, 4, 193–202.
292. Takusagawa, S.; Ushigome, F.; Nemoto, H.; Takahashi, Y.; Li, Q.; Kerbusch, V.; Miyashita, A.; Iwatsubo, T.; Usui, T. Intestinal Absorption Mechanism of Mirabegron, a Potent and Selective B3-Adrenoceptor Agonist: Involvement of Human Efflux and/or Influx Transport Systems. *Mol Pharm* 2013, 10, 1783–1794.
293. Lee, J.; Zhang, W.; Moy, S.; Kowalski, D.; Kerbusch, V.; van Gelderen, M.; Sawamoto, T.; Grunenber, N.; Keirns, J. Effects of Food Intake on the Pharmacokinetic Properties of Mirabegron Oral Controlled-Absorption System: A Single-Dose, Randomized, Crossover Study in Healthy Adults. *Clin Ther* 2013, 35, 333–341.
294. Langel, K.; Gjerde, H.; Favretto, D.; Lillsunde, P.; Øiestad, E.L.; Ferrara, S.D.; Verstraete, A.G. Comparison of Drug Concentrations between Whole Blood and Oral Fluid. *Drug Test Anal* 2014, 6, 461–471.
295. Timmer, C.J.; Ad Sitsen, J.M.; Delbressine, L.P. Clinical Pharmacokinetics of Mirtazapine. *Clin Pharmacokinet* 2000, 38, 461–474.
296. Eskens F. A.; Levitt N. C.; Sparreboom A.; Choi L.; Mather R.; Verweij J.; Harris A. L. Effect of Food on the Pharmacokinetics of Oral MMI270B (CGS 27023A), a Novel Matrix Metalloproteinase Inhibitor. *Clin Cancer Res* 2000, 6, 431–433.
297. Zheng, J.; Xin, Y.; Zhang, J.; Subramanian, R.; Murray, B.P.; Whitney, J.A.; Warr, M.R.; Ling, J.; Moorehead, L.; Kwan, E.; et al. Pharmacokinetics and Disposition of Momelotinib Revealed a Disproportionate Human Metabolite - Resolution for Clinical Development. *Drug Metab Dispos* 2018, 46, 237–247.
298. Xin, Y.; Shao, L.; Maltzman, J.; Stefanidis, D.; Hemenway, J.; Tarnowski, T.; Deng, W.; Silverman, J.A. The Relative Bioavailability, Food Effect, and Drug Interaction With Omeprazole of Momelotinib Tablet Formulation in Healthy Subjects. *Clin Pharmacol Drug Dev* 2018, 7, 277–286.
299. Buice, R.G.; Subramanian, V.S.; Duchin, K.L.; Uko-Nne, S. Bioequivalence of a Highly Variable Drug: An Experience with Nadolol. *Pharm Res* 1996, 13, 1109–1115.
300. Tothfalusi, L.; Endrenyi, L.; Garcia Arieta, A. Evaluation of Bioequivalence for Highly Variable Drugs with Scaled Average Bioequivalence. *Clin Pharmacokinet* 2009, 48, 725–743.
301. Barbeau, G.; Belanger, P.M. Pharmacokinetics of Nalidixic Acid in Old and Young Volunteers. *J Clin Pharmacol* 1982, 22, 490–496.



302. Ogata, H.; Aoyagi, N.; Kaniwa, N.; Ejima, A. Effect of Food on Bioavailability of Nalidixic Acid from Uncoated Tablets Having Different Dissolution Rates. *J Pharmacobiodyn* 1984, 7, 760–767.
303. Bui, K.; She, F.; Hutchison, M.; Brunnström, Å.; Sostek, M. Absorption, Distribution, Metabolism, and Excretion of [14C]-Labeled Naloxegol in Healthy Subjects. *Int J Clin Pharmacol Ther* 2015, 53, 838–846.
304. Weaver M. L.; Orwig B. A.; Rodriguez L. C.; Graham E. D.; Chin J. A.; Shapiro M. J.; McLeod J. F.; Mangold J. B. Pharmacokinetics and Metabolism of Nateglinide in Humans. *Drug Metab Dispos* 2001, 29, 415–421.
305. Karara, A.H.; Dunning, B.E.; McLeod, J.F. The Effect of Food on the Oral Bioavailability and the Pharmacodynamic Actions of the Insulinotropic Agent Nateglinide in Healthy Subjects. *J Clin Pharmacol* 1999, 39, 172–179.
306. Regazzi, M.; Maserati, R.; Villani, P.; Cusato, M.; Zucchi, P.; Briganti, E.; Roda, R.; Sacchelli, L.; Gatti, F.; Delle Foglie, P.; et al. Clinical Pharmacokinetics of Nelfinavir and Its Metabolite M8 in Human Immunodeficiency Virus (HIV)-Positive and HIV-Hepatitis C Virus-Coinfected Subjects. *Antimicrob Agents Chemother* 2005, 49, 643–649.
307. Challenor, V.; Waller, D.; Renwick, A.; Gruchy, B.; George, C. The Trans-hepatic Extraction of Nifedipine. *Br J Clin Pharmacol* 1987, 24, 473–477.
308. Schug, B.S.; Brendel, E.; Wonnemann, M.; Wolf, D.; Wargenau, M.; Dingler, A.; Blume, H.H. Dosage Form-Related Food Interaction Observed in a Marketed Once-Daily Nifedipine Formulation after a High-Fat American Breakfast. *Eur J Clin Pharmacol* 2002, 49, 119–125.
309. Kang, W.; Kim, K.; Kim, E.Y.; Kwon, K. il; Bang, J.S.; Yoon, Y.R. Effect of Food on Systemic Exposure to Niflumic Acid Following Postprandial Administration of Talniflumate. *Eur J Clin Pharmacol* 2008, 64, 1027–1030.
310. Tian, X.; Zhang, H.; Heimbach, T.; He, H.; Buchbinder, A.; Aghoghovbia, M.; Hourcade-Potelleret, F. Clinical Pharmacokinetic and Pharmacodynamic Overview of Nilotinib, a Selective Tyrosine Kinase Inhibitor. *J Clin Pharmacol* 2018, 58, 1533–1540.
311. Terakawa, M.; Tokuma, Y.; Shishido, A.; Noguchi, H. Pharmacokinetics of Nilvadipine in Healthy Volunteers. *J Clin Pharmacol* 1987, 27, 111–117.
312. Terakawa, M.; Tokuma, Y.; Shishido, A.; Yasuda, K.; Noguchi, H. Effect of Two Different Meals on Bioavailability of Nilvadipine in Healthy Volunteers. *J Clin Pharmacol* 1987, 27, 293–296.
313. Bates, T.R.; Sequeira, J.A.; Tembo, A. v. Effect of Food on Nitrofurantoin Absorption. *Clin Pharmacol Ther* 1974, 16, 63–68.
314. Nada, A.H.; Sharaf, M.A.; el Gholmy, Z.A.; Khalafallah, N.M. Comparative Bioavailability of Norfloxacin Tablets Based on Blood and Urine Data. *Med Princ Pract* 2007, 16, 426–431.
315. Stein, G.E. Review of the Bioavailability and Pharmacokinetics of Oral Norfloxacin. *Am J Med* 1987, 82, 18–21.
316. Rodvold, K.A.; Pai, M.P. Pharmacokinetics and Pharmacodynamics of Oral and Intravenous Omadacycline. *Clin Infect Dis* 2019, 69, S16–S22.
317. Tzanis, E.; Manley, A.; Villano, S.; Tanaka, S.K.; Bai, S.; Loh, E. Effect of Food on the Bioavailability of Omadacycline in Healthy Participants. *J Clin Pharmacol* 2017, 57, 321–327.
318. Suri, A.; Pham, T.; Maclean, D.B. A Phase 1, Randomized, Single-Dose Crossover Pharmacokinetic Study to Investigate the Effect of Food Intake on Absorption of Orteronel (TAK-700) in Healthy Male Subjects. *Clin Pharmacol Drug Dev* 2016, 5, 188–195.
319. Koskimies, P.; Katila, K.; Lammintausta, R.; Aaltonen, A.M.; Vuorinen, J.; Saarni, O.; Scheinin, M. Oral Bioavailability of Ospemifene Improves with Food Intake. *Int J Clin Pharmacol Ther* 2013, 51, 787–794.
320. Davies, N.M. Clinical Pharmacokinetics of Oxaprozin. *Clin Pharmacokinet* 1998, 35, 425–436.
321. Chiang S. T.; Knowles J. A.; Hubsher J. A.; Ruelius H. W.; Walker B. R. Effects of Food on Oxaprozin Bioavailability. *J Clin Pharmacol* 1984, 24, 381–385.
322. Bach, T.; Galbiati, S.; Kennedy, J.K.; Deye, G.; Nomicos, E.Y.H.; Codd, E.E.; Garcia, H.H.; Horton, J.; Gilman, R.H.; Gonzalez, A.E.; et al. Pharmacokinetics, Safety, and Tolerability of Oxendazole in Healthy Adults in an Open-Label Phase 1 Multiple Ascending Dose and Food Effect Study. *Antimicrob Agents Chemother* 2020, 64, 1018–1020.
323. An, G.; Murry, D.J.; Gajurel, K.; Bach, T.; Deye, G.; Stebounova, L. v.; Codd, E.E.; Horton, J.; Gonzalez, A.E.; Garcia, H.H.; et al. Pharmacokinetics, Safety, and Tolerability of Oxendazole in Healthy Volunteers: A Randomized, Placebo-Controlled First-Inhuman Single-Dose Escalation Study. *Antimicrob Agents Chemother* 2019, 63, 2255–undefined.
324. McKellar Q. A.; Galbraith E. A.; Baxter P. Oral Absorption and Bioavailability of Fenbendazole in the Dog and the Effect of Concurrent Ingestion of Food. *J Vet Pharmacol Ther* 1993, 16, 189–198.
325. Olivares-Morales, A.; Ghosh, A.; Aarons, L.; Rostami-Hodjegan, A. Development of a Novel Simplified PBPK Absorption Model to Explain the Higher Relative Bioavailability of the OROS® Formulation of Oxybutynin. *AAPS J* 2016, 18, 1532–1549.
326. Sathyan, G.; Chancellor, M.B.; Gupta, S.K. Effect of OROS® Controlled-Release Delivery on the Pharmacokinetics and Pharmacodynamics of Oxybutynin Chloride. *Br J Clin Pharmacol* 2001, 52, 409–417.
327. Lukkari, E.; Castrén-Kortekangas, P.; Juhakoski, A.; Löyttyniemi, E.; Aranko, K.; Neuvonen, P.J. Effect of Food on the Bioavailability of Oxybutynin from a Controlled Release Tablet. *Eur J Clin Pharmacol* 1996, 50, 221–223.
328. Yu, Y.; Loi, C.M.; Hoffman, J.; Wang, D. Physiologically Based Pharmacokinetic Modeling of Palbociclib. *J Clin Pharmacol* 2017, 57, 173–184.
329. Ruiz-Garcia, A.; Plotka, A.; O’Gorman, M.; Wang, D.D. Effect of Food on the Bioavailability of Palbociclib. *Cancer Chemother Pharmacol* 2017, 79, 527–533.

330. Savelieva, M.; Woo, M.M.; Schran, H.; Mu, S.; Nedelman, J.; Capdeville, R. Population Pharmacokinetics of Intravenous and Oral Panobinostat in Patients with Hematologic and Solid Tumors. *Eur J Clin Pharmacol* 2015, 71, 663–672.
331. Shapiro, G.I.; Frank, R.; Dandamudi, U.B.; Hengelage, T.; Zhao, L.; Gazi, L.; Porro, M.G.; Woo, M.M.; Lewis, L.D. The Effect of Food on the Bioavailability of Panobinostat, an Orally Active Pan-Histone Deacetylase Inhibitor, in Patients with Advanced Cancer. *Cancer Chemother Pharmacol* 2012, 69, 555–562.
332. Finkel, Y.; Bolme, P.; Eriksson, M. The Effect of Food on the Oral Absorption of Penicillin V Preparations in Children. *Acta Pharmacol Toxicol* 1981, 49, 301–304.
333. Wollenberg, L.A.; Corson, D.T.; Nugent, C.A.; Peterson, F.L.; Ptaszynski, A.M.; Arrigo, A.; Mannila, C.G.; Litwiler, K.S.; Bell, S.J. An Exploratory, Randomized, Parallel-Group, Open-Label, Relative Bioavailability Study with an Additional Two-Period Crossover Food-Effect Study Exploring the Pharmacokinetics of Two Novel Formulations of Pexmetinib (ARRY-614). *Clin Pharmacol* 2015, 7, 87–95.
334. Giri, N.; Lam, L.H.; LaBadie, R.R.; Krzyzaniak, J.F.; Jiang, H.; Hee, B.; Liang, Y.; Shaik, M.N. Evaluation of the Effect of New Formulation, Food, or a Proton Pump Inhibitor on the Relative Bioavailability of the Smoothed Inhibitor Glasdegib (PF-04449913) in Healthy Volunteers. *Cancer Chemother Pharmacol* 2017, 80, 1249–1260.
335. Kong, S.T.; Lim, S.H.; Lee, W.B.; Kumar, P.K.; Wang, H.Y.S.; Ng, Y.L.S.; Wong, P.S.; Ho, P.C. Clinical Validation and Implications of Dried Blood Spot Sampling of Carbamazepine, Valproic Acid and Phenytoin in Patients with Epilepsy. *PLoS ONE* 2014, 9.
336. Cranford, R.E.; Leppik, I.E.; Patrick, B.; Anderson, C.B.; Kostick, B. Intravenous Phenytoin: Clinical and Pharmacokinetic Aspects. *Neurology* 1978, 28, 874–880.
337. Lu T.; Fraczekiewicz G.; Salphati L.; Budha N.; Dalziel G.; Smelick G. S.; Morrissey K. M.; Davis J. D.; Jin J. Y.; Ware J. A. Combining “Bottom-up” and “Top-down” Approaches to Assess the Impact of Food and Gastric PH on Pictilisib (GDC-0941) Pharmacokinetics. *CPT Pharmacometrics Syst Pharmacol* 2017, 6, 747–755.
338. Reuter, S.E.; Evans, A.M.; Shakib, S.; Lungershausen, Y.; Francis, B.; Valentini, G.; Bacchieri, A.; Ubben, D.; Pace, S. Effect of Food on the Pharmacokinetics of Piperazine and Dihydroartemisinin. *Clin Drug Investig* 2015, 35, 559–567.
339. Schachter, M. Chemical, Pharmacokinetic and Pharmacodynamic Properties of Statins: An Update. *Fundam Clin Pharmacol* 2005, 19, 117–125.
340. Cherkaoui-Rbati, M.H.; Paine, S.W.; Littlewood, P.; Rauch, C. A Quantitative Systems Pharmacology Approach, Incorporating a Novel Liver Model, for Predicting Pharmacokinetic Drug-Drug Interactions. *PLoS ONE* 2017, 12.
341. Abdel-Rahman, S.M.; Kearns, G.L. Single-Dose Pharmacokinetics of a Pleconaril (VP63843) Oral Solution and Effect of Food. *Antimicrob Agents Chemother* 1998, 42, 2706–2709.
342. Narasimhan, N.I.; Dorer, D.J.; Niland, K.; Haluska, F.; Sonnichsen, D. Effects of Ketoconazole on the Pharmacokinetics of Ponatinib in Healthy Subjects. *J Clin Pharmacol* 2013, 53, 974–981.
343. Narasimhan, N.I.; Dorer, D.J.; Niland, K.; Haluska, F.; Sonnichsen, D. Effects of Food on the Pharmacokinetics of Ponatinib in Healthy Subjects. *J Clin Pharm Ther* 2013, 38, 440–444.
344. Wiederhold, N.P. Pharmacokinetics and Safety of Posaconazole Delayed-Release Tablets for Invasive Fungal Infections. *Clin Pharmacol* 2015, 8, 1–8.
345. Li, Y.; Theuretzbacher, U.; Clancy, C.J.; Nguyen, M.H.; Derendorf, H. Pharmacokinetic/Pharmacodynamic Profile of Posaconazole. *Clin Pharmacokinet* 2010, 49, 379–396.
346. Courtney, R.; Wexler, D.; Radwanski, E.; Lim, J.; Laughlin, M. Effect of Food on the Relative Bioavailability of Two Oral Formulations of Posaconazole in Healthy Adults. *Br J Clin Pharmacol* 2004, 57, 218–222.
347. Meyers, C.D.; Amer, A.; Majumdar, T.; Chen, J. Pharmacokinetics, Pharmacodynamics, Safety, and Tolerability of Pradigastat, a Novel Diacylglycerol Acyltransferase 1 Inhibitor in Overweight or Obese, but Otherwise Healthy Human Subjects. *J Clin Pharmacol* 2015, 55, 1031–1041.
348. Ayalasomayajula, S.P.; Meyers, C.D.; Yu, J.; Kagan, M.; Matott, R.; Pal, P.; Majumdar, T.; Su, Z.; Crissey, A.; Rebello, S.; et al. Evaluation of Food Effect on the Oral Bioavailability of Pradigastat, a Diacylglycerol Acyltransferase 1 Inhibitor. *BioPharm Drug Dispos* 2015, 36, 452–461.
349. Cutler, D.L.; Tendolkar, A.; Grachev, I.D. Safety, Tolerability and Pharmacokinetics after Single and Multiple Doses of Preladenant (SCH420814) Administered in Healthy Subjects. *J Clin Pharm Ther* 2012, 37, 578–587.
350. Cutler, D.L.; Tendolkar, A.; Grachev, I.D. Evaluation of the Effects of a High-Fat Meal on the Oral Bioavailability of a Single Dose of Preladenant in Healthy Subjects. *J Clin Pharmacol* 2012, 52, 1698–1703.
351. Winter, H.; Ginsberg, A.; Egizi, E.; Erondur, N.; Whitney, K.; Pauli, E.; Everitt, D. Effect of a High-Calorie, High-Fat Meal on the Bioavailability and Pharmacokinetics of PA-824 in Healthy Adult Subjects. *Antimicrob Agents Chemother* 2013, 57, 5516–5520.
352. Nair, A.; Abrahamsson, B.; Barends, D.M.; Groot, D.W.; Kopp, S.; Polli, J.E.; Shah, V.P.; Dressman, J.B. Biowaiver Monographs for Immediate-Release Solid Oral Dosage Forms: Primaquine Phosphate. *J Pharm Sci* 2012, 101, 936–945.
353. Mihaly, G.; Ward, S.; Edwards, G.; Nicholl, D.; Orme, M.; Breckenridge, A. Pharmacokinetics of Primaquine in Man. I. Studies of the Absolute Bioavailability and Effects of Dose Size. *Br J Clin Pharmacol* 1985, 19, 745–750.
354. Cuong, B.T.; Binh, V.Q.; Dai, B.; Duy, D.N.; Lovell, C.M.; Rieckmann, K.H.; Edstein, M.D. Does Gender, Food or Grapefruit Juice Alter the Pharmacokinetics of Primaquine in Healthy Subjects? *Br J Clin Pharmacol* 2006, 61, 682–689.

355. Rocci, M.L.; Mojaverian, P.; Davis, R.J.; Ferguson, R.K.; Vlasses, P.H. Food-Induced Gastric Retention and Absorption of Sustained-Release Procainamide. *Clin Pharm Ther* 1987, 42, 45–49.
356. Siddoway, L.A.; Roden, D.M.; Woosley, R.L. Clinical Pharmacology of Propafenone: Pharmacokinetics, Metabolism and Concentration-Response Relations. *Am J Cardiol* 1984, 54, 9D–12D.
357. Axelson, J.; Chan, G.; Kirsten, E.; Mason, W.; Lanman, R.; Kerr, C. Food Increases the Bioavailability of Propafenone. *Br J Clin Pharmacol* 1987, 23, 735–741.
358. Launiainen, T.; Ojanperä, I. Drug Concentrations in Post-Mortem Femoral Blood Compared with Therapeutic Concentrations in Plasma. *Drug Test Anal* 2014, 6, 308–316.
359. Chao, S.T.; Prather, D.; Pinson, D.; Coen, P.; Pruitt, B.; Knowles, M.; Place, V. Effect of Food on Bioavailability of Pseudoephedrine and Brompheniramine Administered from a Gastrointestinal Therapeutic System. *J Pharm Sci* 1991, 80, 432–435.
360. Schmitt, C.; Charoin-Pannier, A.; McIntyre, C.; Zandt, H.; Ciorciaro, C.; Zweigler, L.; Winters, K.; Pepper, T. Effect of Food on the Pharmacokinetics and Pharmacodynamics of R1663, an Oral Factor Xa Inhibitor, in Healthy Male Volunteers. *Int J Clin Pharmacol Ther* 2012, 50, 566–572.
361. Brainard, D.M.; Friedman, E.J.; Jin, B.; Breidinger, S.A.; Tillan, M.D.; Wenning, L.A.; Stone, J.A.; Chodakewitz, J.A.; Wagner, J.A.; Iwamoto, M. Effect of Low-, Moderate-, and High-Fat Meals on Raltegravir Pharmacokinetics. *J Clin Pharmacol* 2011, 51, 422–427.
362. Laufer, R.; Paz, O.G.; di Marco, A.; Bonelli, F.; Monteagudo, E.; Summa, V.; Rowley, M. Quantitative Prediction of Human Clearance Guiding the Development of Raltegravir (MK-0518, Isentress) and Related HIV Integrase Inhibitors. *Drug Metab Dispos* 2009, 37, 873–883.
363. Watt K.; Manzoni P.; Cohen-Wolkowicz M.; Rizzollo S.; Boano E.; Jacqz-Aigrain E.; Benjamin D. K. Triazole Use in the Nursery: Fluconazole, Voriconazole, Posaconazole, and Ravuconazole. *Curr Drug Metab* 2013, 14, 193–202.
364. Beermann, D.; Schaefer, H.G.; Wargenau, M.; Heibel, B.; Sturm, Y.; Kuhlmann, J. Pharmacokinetics of the Active Metabolite of the Prodrug Repirinast in Healthy Caucasian Volunteers after a Single Oral Dose. *Eur J Clin Pharmacol* 1992, 42, 307–312.
365. Preston, S.L.; Drusano, G.L.; Glue, P.; Nash, J.; Gupta, S.K.; McNamara, P. Pharmacokinetics and Absolute Bioavailability of Ribavirin in Healthy Volunteers as Determined by Stable-Isotope Methodology. *Antimicrob Agents Chemother* 1999, 43, 2451–2456.
366. Zempleni, J.; Galloway, J.R.; McCormick, D.B. Pharmacokinetics of Orally and Intravenously Administered Riboflavin in Healthy Humans. *Am J Clin Nutr* 1996, 63, 54–66.
367. Subramanian, V.S.; Ghosal, A.; Kapadia, R.; Nabokina, S.M.; Said, H.M. Molecular Mechanisms Mediating the Adaptive Regulation of Intestinal Riboflavin Uptake Process. *PLoS ONE* 2015, 10.
368. Skinner, M.H.; Hsieh, M.; Torseth, J.; Pauloin, D.; Bhatia, G.; Harkonen, S.; Merigan, T.C.; Blaschke, T.F. Pharmacokinetics of Rifabutin. *Antimicrob Agents Chemother* 1989, 33, 1237–1241.
369. Chen, Y.X.; Cabana, B.; Kivel, N.; Michaelis, A. Effect of Food on the Pharmacokinetics of Rifalazil, a Novel Antibacterial, in Healthy Male Volunteers. *J Clin Pharmacol* 2007, 47, 841–849.
370. Loos, U.; Musch, E.; Jensen, J.C.; Mikus, G.; Schwabe, H.K.; Eichelbaum, M. Pharmacokinetics of Oral and Intravenous Rifampicin during Chronic Administration. *Klin Wochenschr* 1985, 63, 1205–1211.
371. Zent, C.; Smith, P. Study of the Effect of Concomitant Food on the Bioavailability of Rifampicin, Isoniazid and Pyrazinamide. *Tuber Lung Dis* 1995, 76, 109–113.
372. Aouri, M.; Barcelo, C.; Guidi, M.; Rotger, M.; Cavassini, M.; Hizrel, C.; Buclin, T.; Decosterd, L.A.; Csajk, C. Population Pharmacokinetics and Pharmacogenetics Analysis of Rilpivirine in HIV-1-Infected Individuals. *Antimicrob Agents Chemother* 2017, 61.
373. Crauwels, H.M.; van Heeswijk, R.P.G.; Buelens, A.; Stevens, M.; Boven, K.; Hoetelmans, R.M.W. Impact of Food and Different Meal Types on the Pharmacokinetics of Rilpivirine. *J Clin Pharmacol* 2013, 53, 834–840.
374. Frey, R.; Becker, C.; Saleh, S.; Unger, S.; van der Mey, D.; Mück, W. Clinical Pharmacokinetic and Pharmacodynamic Profile of Riociguat. *Clin Pharmacokinet* 2018, 57, 647–661.
375. Arora, S.; Pansari, A.; Kilford, P.; Jamei, M.; Gardner, I.; Turner, D.B. Biopharmaceutic in Vitro in Vivo Extrapolation (IVIVE) Informed Physiologically-Based Pharmacokinetic Model of Ritonavir Norvir Tablet Absorption in Humans under Fasted and Fed State Conditions. *Mol Pharm* 2020, 17, 2329–2344.
376. van Kampen, J.J.A.; Reedijk, M.L.; Burgers, P.C.; Dekker, L.J.M.; Hartwig, N.G.; van der Ende, I.E.; de Groot, R.; Osterhaus, A.D.M.E.; Burger, D.M.; Luiders, T.M.; et al. Ultra-Fast Analysis of Plasma and Intracellular Levels of HIV Protease Inhibitors in Children: A Clinical Application of MALDI Mass Spectrometry. *PLoS ONE* 2010, 5.
377. Hsu, A.; Granneman, G.R.; Witt, G.; Locke, C.; Denissen, J.; Molla, A.; Valdes, J.; Smith, J.; Erdman, K.; Lyons, N.; et al. Multiple-Dose Pharmacokinetics of Ritonavir in Human Immunodeficiency Virus-Infected Subjects. *Antimicrob Agents Chemother* 1997, 41, 898–905.
378. Stampfuss, J.; Kubitz, D.; Becka, M.; Mueck, W. The Effect of Food on the Absorption and Pharmacokinetics of Rivaroxaban. *Int J Clin Pharmacol Ther* 2013, 51, 549–561.
379. Mueck, W.; Stampfuss, J.; Kubitz, D.; Becka, M. Clinical Pharmacokinetic and Pharmacodynamic Profile of Rivaroxaban. *Clin Pharmacokinet* 2014, 53, 1–16.

380. McLean, C.C.; Teft, W.A.; Morse, B.L.; Gryn, S.E.; Hegele, R.A.; Kim, R.B. Food Effect on Rosuvastatin Disposition and Low-Density Lipoprotein Cholesterol. *Clin Pharmacol Ther* 2018, 104, 525–533.
381. Perucca, E.; Cloyd, J.; Critchley, D.; Fuseau, E. Rufinamide: Clinical Pharmacokinetics and Concentration-Response Relationships in Patients with Epilepsy. *Epilepsia* 2008, 49, 1123–1141.
382. Cardot, J. M.; Lecaillon, J. B.; Czendlik, C.; Godbillon, J. The Influence of Food on the Disposition of the Antiepileptic Rufinamide in Healthy Volunteers. *Biopharm Drug Dispos* 1998, 19, 259–262.
383. Solans, A.; Carbó, M.; Peña, J.; Nadal, T.; Izquierdo, I.; Merlos, M. Influence of Food on the Oral Bioavailability of Rupatadine Tablets in Healthy Volunteers: A Single-Dose, Randomized, Open-Label, Two-Way Crossover Study. *Clin Ther* 2007, 29, 900–908.
384. Akahori, M.; Ayalasomayajula, S.; Langenickel, T.; Pal, P.; Zhou, W.; Sunkara, G. Pharmacokinetics After Single Ascending Dose, Food Effect, and Safety of Sacubitril/Valsartan (LCZ696), an Angiotensin Receptor and Neprilysin Inhibitor, in Healthy Japanese Subjects. *Eur J Drug Metab Pharmacokinet* 2017, 42, 407–416.
385. Ayalasomayajula, S.; Langenickel, T.; Pal, P.; Boggarapu, S.; Sunkara, G. Clinical Pharmacokinetics of Sacubitril/Valsartan (LCZ696): A Novel Angiotensin Receptor-Neprilysin Inhibitor. *Clin Pharmacokinet* 2017, 56, 1461–1478.
386. Seithel-Keuth, A.; Johne, A.; Freisleben, A.; Kupas, K.; Lissy, M.; Krösser, S. Absolute Bioavailability and Effect of Food on the Disposition of Sildenafil Immediate Release Tablets in Healthy Adult Subjects. *Clin Pharmacol Drug Dev* 2013, 2, 79–89.
387. Musson, D.G.; Kramer, W.G.; Foehr, E.D.; Bieberdorf, F.A.; Hornfeldt, C.S.; Kim, S.S.; Dorenbaum, A. Relative Bioavailability of Sapropterin from Intact and Dissolved Sapropterin Dihydrochloride Tablets and the Effects of Food: A Randomized, Open-Label, Crossover Study in Healthy Adults. *Clin Ther* 2010, 32, 338–346.
388. FDA Label Available online: [https://www.accessdata.fda.gov/drugsatfda\\_docs/label/2010/020628s032,021785s009lbl.pdf](https://www.accessdata.fda.gov/drugsatfda_docs/label/2010/020628s032,021785s009lbl.pdf) (accessed on 30 May 2021).
389. Jani, R.H.; Kansagra, K.; Jain, M.R.; Patel, H. Pharmacokinetics, Safety, and Tolerability of Saroglitazar (ZYH1), a Predominantly PPAR $\alpha$  Agonist with Moderate PPAR $\gamma$  Agonist Activity in Healthy Human Subjects. *Clin Drug Investig* 2013, 33, 809–816.
390. Patel, M.R.; Kansagra, K.A.; Parikh, D.P.; Parmar, D. v.; Patel, H.B.; Soni, M.M.; Patil, U.S.; Patel, H. v.; Patel, J.A.; Gujarathi, S.S.; et al. Effect of Food on the Pharmacokinetics of Saroglitazar Magnesium, a Novel Dual PPAR $\alpha$  $\gamma$  Agonist, in Healthy Adult Subjects. *Clin Drug Investig* 2018, 38, 57–65.
391. Mahmood, I. Clinical Pharmacokinetics and Pharmacodynamics of Selegiline: An Update. *Clin Pharmacokinet* 1997, 33, 91–102.
392. Barrett, J.S.; Rohatagi, S.; DeWitt, K.E.; Morales, R.J.; DiSanto, A.R. The Effect of Dosing Regimen and Food on the Bioavailability of the Extensively Metabolized, Highly Variable Drug Eldepryl® (Selegiline Hydrochloride). *Am J Ther* 1996, 3, 298–313.
393. Kaufmann, P.; Okubo, K.; Bruderer, S.; Mant, T.; Yamada, T.; Dingemanse, J.; Mukai, H. Pharmacokinetics and Tolerability of the Novel Oral Prostacyclin IP Receptor Agonist Selexipag. *Am J Cardiovasc Drugs* 2015, 15, 195–203.
394. Tomkinson, H.; McBride, E.; Martin, P.; Lisbon, E.; Dymond, A.W.; Cantarini, M.; So, K.; Holt, D. Comparison of the Pharmacokinetics of the Phase II and Phase III Capsule Formulations of Selumetinib and the Effects of Food on Exposure: Results From Two Randomized Crossover Trials in Healthy Male Subjects. *Clin Ther* 2017, 39, 2260–2275.e1.
395. Dymond, A.W.; Howes, C.; Pattison, C.; So, K.; Mariani, G.; Savage, M.; Mair, S.; Ford, G.; Martin, P. Metabolism, Excretion, and Pharmacokinetics of Selumetinib, an MEK1/2 Inhibitor, in Healthy Adult Male Subjects. *Clin Ther* 2016, 38, 2447–2458.
396. Wong S. L.; Linnen P.; Mack R.; Granneman G. R. Effects of Food, Antacid, and Dosage Form on the Pharmacokinetics and Relative Bioavailability of Sertindole in Healthy Volunteers. *Biopharm Drug Dispos* 1997, 18, 533–541.
397. Wong, S.L.; Cao, G.; Mack, R.J.; Granneman, G.R. Pharmacokinetics of Sertindole in Healthy Young and Elderly Male and Female Subjects. *Clin Pharmacol Ther* 1997, 62, 157–164.
398. Nichols, D.J.; Muirhead, G.J.; Harness, J.A. Pharmacokinetics of Sildenafil Citrate after Single Oral Doses in Healthy Male Subjects: Absolute Bioavailability, Food Effects and Dose Proportionality. *Br J Clin Pharmacol* 2002, 53.
399. German, P.; Mathias, A.; Brainard, D.; Kearney, B.P. Clinical Pharmacokinetics and Pharmacodynamics of Ledipasvir/Sofosbuvir, a Fixed-Dose Combination Tablet for the Treatment of Hepatitis C. *Clin Pharmacokinet* 2016, 55, 1337–1351.
400. MacLauchlin, C.; Schneider, S.E.; Keedy, K.; Fernandes, P.; Jamieson, B.D. Metabolism, Excretion, and Mass Balance of Solithromycin in Humans. *Antimicrob Agents Chemother* 2018, 62.
401. Still, J.G.; Schranz, J.; Degenhardt, T.P.; Scott, D.; Fernandes, P.; Gutierrez, M.J.; Clark, K. Pharmacokinetics of Solithromycin (CEM-101) after Single or Multiple Oral Doses and Effects of Food on Single-Dose Bioavailability in Healthy Adult Subjects. *Antimicrob Agents Chemother* 2011, 55, 1997–2003.
402. Kahela, P.; Anttila, M.; Tikkanen, R.; Sundquist, H. Effect of Food, Food Constituents and Fluid Volume on the Bioavailability of Sotalol. *Acta Pharmacol Toxicol* 1979, 44, 7–12.
403. Hoffmann, E.; Wald, J.; Lavu, S.; Roberts, J.; Beaumont, C.; Haddad, J.; Elliott, P.; Westphal, C.; Jacobson, E. Pharmacokinetics and Tolerability of SRT2104, a First-in-Class Small Molecule Activator of SIRT1, after Single and Repeated Oral Administration in Man. *Br J Clin Pharmacol* 2013, 75, 186–196.

404. Shinkuma D.; Hamaguchi T.; Kobayashi M.; Yamanaka Y.; Mizuno N. Effects of Food Intake on the Bioavailability of Sulpiride from AEA Film-Coated Tablet Having a PH-Dependent Dissolution Characteristic in Normal or Drug-Induced Achlorhydric Subjects. *Int J Clin Pharmacol Ther Toxicol* 1991, 29, 303–309.
405. Bello, C.L.; Sherman, L.; Zhou, J.; Verkh, L.; Smeraglia, J.; Mount, J.; Klamers, K.J. Effect of Food on the Pharmacokinetics of Sunitinib Malate (SU11248), a Multi-Targeted Receptor Tyrosine Kinase Inhibitor: Results from a Phase I Study in Healthy Subjects. *Anti-Cancer Drugs* 2006, 17, 353–358.
406. Speed, B.; Bu, H.Z.; Pool, W.F.; Peng, G.W.; Wu, E.Y.; Patyna, S.; Bello, C.; Kang, P. Pharmacokinetics, Distribution, and Metabolism of [14C]Sunitinib in Rats, Monkeys, and Humans. *Drug Metab Dispos* 2012, 40, 539–555.
407. Möller A.; Iwasaki K.; Kawamura A.; Teramura Y.; Shiraga T.; Hata T.; Schäfer A.; Undre N. A. The Disposition of 14C-Labeled Tacrolimus after Intravenous and Oral Administration in Healthy Human Subjects. *Drug Metab Dispos* 1999, 27, 633–636.
408. Bekersky, I.; Dressler, D.; Mekki, Q.A. Effect of Low- and High-Fat Meals on Tacrolimus Absorption Following 5 Mg Single Oral Doses to Healthy Human Subjects. *J Clin Pharmacol* 2001, 41, 176–182.
409. FDA Label Available online: [https://www.accessdata.fda.gov/drugsatfda\\_docs/label/2018/211651s000lbl.pdf](https://www.accessdata.fda.gov/drugsatfda_docs/label/2018/211651s000lbl.pdf) (accessed on 30 May 2021).
410. Flanagan, S.D.; Bien, P.A.; Muñoz, K.A.; Minassian, S.L.; Prokocimer, P.G. Pharmacokinetics of Tedizolid Following Oral Administration: Single and Multiple Dose, Effect of Food, and Comparison of Two Solid Forms of the Prodrug. *Pharmacotherapy* 2014, 34, 240–250.
411. Park, A. young J.; Wang, J.; Jayne, J.; Fukushima, L.; Rao, A.P.; D’Argenio, D.Z.; Beringer, P.M. Pharmacokinetics of Tedizolid in Plasma and Sputum of Adults with Cystic Fibrosis. *Antimicrob Agents Chemother* 2018, 62.
412. Yamada, I.; Suzuki, F.; Kamiya, N.; Aoki, K.; Sakurai, Y.; Kano, M.; Matsui, H.; Kumada, H. Safety, Pharmacokinetics and Resistant Variants of Telaprevir Alone for 12 Weeks in Hepatitis C Virus Genotype 1b Infection. *J Viral Hepat* 2012, 19.
413. Namour, F.; Wessels, D.H.; Pascual, M.H.; Reynolds, D.; Sultan, E.; Lenfant, B. Pharmacokinetics of the New Ketolide Telithromycin (HMR 3647) Administered in Ascending Single and Multiple Doses. *Antimicrob Agents Chemother* 2001, 45, 170–175.
414. Bhargava, V.; Lenfant, B.; Perret, C.; Pascual, M.H.; Sultan, E.; Montay, G. Lack of Effect of Food on the Bioavailability of a New Ketolide Antibacterial, Telithromycin. *Scand J Infect Dis* 2002, 34, 823–826.
415. Day, R.; Lam, S.; Paull, P.; Wade, D. Effect of Food and Various Antacids on the Absorption of Tenoxicam. *British Journal of Clinical Pharmacology* 1987, 24, 323–328.
416. Hosseini-Yeganeh, M.; McLachlan, A.J. Physiologically Based Pharmacokinetic Model for Terbinafine in Rats and Humans. *Antimicrob Agents Chemother* 2002, 46, 2219–2228.
417. Jensen, J.C. Clinical Pharmacokinetics of Terbinafine (Lamisil). *Clin Exp Dermatol* 1989, 14, 110–113.
418. Nedelman J.; Cramer J. A.; Robbins B.; Gibiansky E.; Chang C. T.; Gareffa S.; Cohen A.; Meligen J. The Effect of Food on the Pharmacokinetics of Multiple-Dose Terbinafine in Young and Elderly Healthy Subjects. *Biopharm Drug Dispos* 1997, 18, 127–138.
419. Dahan, A.; Altman, H. Food-Drug Interaction: Grapefruit Juice Augments Drug Bioavailability - Mechanism, Extent and Relevance. *Eur J Clin Nutr* 2004, 58, 1–9.
420. Tax L Absolute Bioavailability of Testosterone after Oral Administration of Testosterone-Undecanoate and Testosterone. *Eur J Drug Metab Pharmacokinet* 1987, 12, 225–226.
421. Bagchus, W.M.; Hust, R.; Maris, F.; Schnabel, P.G.; Houwing, N.S. Important Effect of Food on the Bioavailability of Oral Testosterone Undecanoate. *Pharmacotherapy* 2003, 23, 319–325.
422. Agwuh, K.N.; MacGowan, A. Pharmacokinetics and Pharmacodynamics of the Tetracyclines Including Glycylcyclines. *J Antimicrob Chemother* 2006, 58, 256–265.
423. Zgair, A.; Lee, J.B.; Wong, J.C.M.; Taha, D.A.; Aram, J.; di Virgilio, D.; McArthur, J.W.; Cheng, Y.K.; Hennig, I.M.; Barrett, D.A.; et al. Oral Administration of Cannabis with Lipids Leads to High Levels of Cannabinoids in the Intestinal Lymphatic System and Prominent Immunomodulation. *Sci Rep* 2017, 7.
424. Karim, A. Effects of Food on the Bioavailability of Theophylline from Controlled-Release Products in Adults. *J Allergy Clin Immunol* 1986, 78, 695–703.
425. Cavett, C.L.; Li, Z.; McKiernan, B.C.; Reinhart, J.M. Pharmacokinetics of a Modified, Compounded Theophylline Product in Dogs. *J Vet Pharmacol Ther* 2019, 42, 593–601.
426. Desager, J.P. Clinical Pharmacokinetics of Ticlopidine. *Clin Pharmacokinet* 1994, 26, 347–355.
427. Shah, J.; Fratis, A.; Ellis, D.; Murakami, S.; Teitelbaum, P. Effect of Food and Antacid on Absorption of Orally Administered Ticlopidine Hydrochloride. *J Clin Pharmacol* 1990, 30, 733–736.
428. Ashraf, M.W.; Peltoniemi, M.A.; Olkkola, K.T.; Neuvonen, P.J.; Saari, T.I. Semimechanistic Population Pharmacokinetic Model to Predict the Drug–Drug Interaction between S-Ketamine and Ticlopidine in Healthy Human Volunteers. *CPT Pharmacometrics Syst Pharmacol* 2018, 7, 687–697.
429. Fu, J.Y.; Che, H.L.; Tan, D.M.Y.; Teng, K.T. Bioavailability of Tocotrienols: Evidence in Human Studies. *Nutr Metab* 2014, 11.
430. Yap, S.P.; Yuen, K.H.; Wong, J.W. Pharmacokinetics and Bioavailability of  $\alpha$ -,  $\gamma$ - and  $\delta$ -Tocotrienols under Different Food Status. *J Pharm Pharmacol* 2010, 53, 67–71.

431. Mahipal, A.; Klapman, J.; Vignesh, S.; Yang, C.S.; Neuger, A.; Chen, D.T.; Malafa, M.P. Pharmacokinetics and Safety of Vitamin E  $\delta$ -Tocotrienol after Single and Multiple Doses in Healthy Subjects with Measurement of Vitamin E Metabolites. *Cancer Chemother Pharmacol* 2016, 78, 157–165.
432. Dowty, M.E.; Lin, J.; Ryder, T.F.; Wang, W.; Walker, G.S.; Vaz, A.; Chan, G.L.; Krishnaswami, S.; Prakash, C. The Pharmacokinetics, Metabolism and Clearance Mechanisms of Tofacitinib, a Janus Kinase Inhibitor, in Humans. *Drug Metab Dispos* 2014, 42, 759–773.
433. Lamba, M.; Wang, R.; Fletcher, T.; Alvey, C.; Kushner, J.; Stock, T.C. Extended-Release Once-Daily Formulation of Tofacitinib: Evaluation of Pharmacokinetics Compared With Immediate-Release Tofacitinib and Impact of Food. *J Clin Pharmacol* 2016, 56, 1362–1371.
434. Olsson, B.; Brynne, N.; Johansson, C.; Arnberg, H. Food Increases the Bioavailability of Tolterodine but Not Effective Exposure. *J Clin Pharmacol* 2001, 41, 298–304.
435. Pählman I.; Gozzi P. Serum Protein Binding of Tolterodine and Its Major Metabolites in Humans and Several Animal Species. *Biopharm Drug Dispos* 1999, 20, 91–99.
436. Rosenfeld, W.E. Topiramate: A Review of Preclinical, Pharmacokinetic, and Clinical Data. *Clin Ther* 1997, 19, 1294–1308.
437. Dose, D.R.; Walker, S.A.; Gisclon, L.G.; Nayak, R.K. Single-Dose Pharmacokinetics and Effect of Food on the Bioavailability of Topiramate, a Novel Antiepileptic Drug. *J Clin Pharmacol* 1996, 36, 884–891.
438. Nakanishi, H.; Yonezawa, A.; Matsubara, K.; Yano, I. Impact of P-Glycoprotein and Breast Cancer Resistance Protein on the Brain Distribution of Antiepileptic Drugs in Knockout Mouse Models. *Eur J Pharmacol* 2013, 710, 20–28.
439. Kramer, W.G. Effect of Food on the Pharmacokinetics and Pharmacodynamics of Torsemide. *Am J Ther* 1995, 2, 499–503.
440. Cox, D.S.; Papadopoulos, K.; Fang, L.; Bauman, J.; Lorusso, P.; Tolcher, A.; Patnaik, A.; Pendry, C.; Orford, K.; Ouellet, D. Evaluation of the Effects of Food on the Single-Dose Pharmacokinetics of Trametinib, a First-in-Class MEK Inhibitor, in Patients with Cancer. *J Clin Pharmacol* 2013, 53, 946–954.
441. Leonowens, C.; Pendry, C.; Bauman, J.; Young, G.C.; Ho, M.; Henriquez, F.; Fang, L.; Morrison, R.A.; Orford, K.; Ouellet, D. Concomitant Oral and Intravenous Pharmacokinetics of Trametinib, a MEK Inhibitor, in Subjects with Solid Tumours. *Br J Clin Pharmacol* 2014, 78, 524–532.
442. Kumar, P.; Thudium, E.; Laliberte, K.; Zaccardelli, D.; Nelsen, A. A Comprehensive Review of Treprostinil Pharmacokinetics via Four Routes of Administration. *Clin Pharmacokinet* 2016, 55, 1495–1505.
443. Lim, A.; Wang-Smith, L.; Kates, J.; Laurent, A.; Kumar, P.; Laliberte, K. The Effect of Different Meal Compositions on the Oral Bioavailability of Treprostinil Diolamine in Healthy Volunteers. *J Clin Pharm Ther* 2013, 38, 450–455.
444. Loi, C.M.; Young, M.; Randinitis, E.; Vassos, A.; Koup, J.R. Clinical Pharmacokinetics of Troglitazone. *Clin Pharmacokinet* 1999, 37, 91–104.
445. Young, M.A.; Lettis, S.; Eastmond, R. Improvement in the Gastrointestinal Absorption of Troglitazone When Taken with, or Shortly after, Food. *Br J Clin Pharmacol* 1998, 45, 31–35.
446. Teng, R.; Dogolo, L.C.; Willavize, S.A.; Friedman, H.L.; Vincent, J. Oral Bioavailability of Trovafloxacin with and without Food in Healthy Volunteers. *J Antimicrob Chemother* 1997, 39, 87–92.
447. Teng, R.; Liston, T.E.; Harris, S.C. Multiple-Dose Pharmacokinetics and Safety of Trovafloxacin in Healthy Volunteers. *J Antimicrob Chemother* 1996, 37, 955–963.
448. VanDenBerg C. M.; Blob L. F.; Kemper E. M.; Azzaro A. J. Tyramine Pharmacokinetics and Reduced Bioavailability with Food. *J Clin Pharmacol* 2003, 43, 604–609.
449. Yamamoto, Y.; Danhof, M.; de Lange, E.C.M. Microdialysis: The Key to Physiologically Based Model Prediction of Human CNS Target Site Concentrations. *AAPS J* 2017, 19, 891–909.
450. Kim, B.H.; Lim, H.S.; Chung, J.Y.; Kim, J.R.; Lim, K.S.; Sohn, D.R.; Cho, J.Y.; Yu, K.S.; Shin, S.G.; Paick, J.S.; et al. Safety, Tolerability and Pharmacokinetics of Udenafil, a Novel PDE-5 Inhibitor, in Healthy Young Korean Subjects. *Br J Clin Pharmacol* 2008, 65, 848–854.
451. Kim, T.E.; Kim, B.H.; Kim, J.R.; Lim, K.S.; Hong, J.H.; Kim, K.P.; Kim, H.S.; Shin, S.G.; Jang, I.J.; Yu, K.S. Effect of Food on the Pharmacokinetics of the Oral Phosphodiesterase 5 Inhibitor Udenafil for the Treatment of Erectile Dysfunction. *Br J Clin Pharmacol* 2009, 68, 43–46.
452. Yamamoto, S.; Inoue, K.; Murata, T.; Kamigaso, S.; Yasujima, T.; Maeda, J.Y.; Yoshida, Y.; Ohta, K.Y.; Yuasa, H. Identification and Functional Characterization of the First Nucleobase Transporter in Mammals: Implication in the Species Difference in the Intestinal Absorption Mechanism of Nucleobases and Their Analogs between Higher Primates and Other Mammals. *J Biol Chem* 2010, 285, 6522–6531.
453. Gupta, M.; Kovar, A.; Meibohm, B. The Clinical Pharmacokinetics of Phosphodiesterase-5 Inhibitors for Erectile Dysfunction. *J Clin Pharmacol* 2005, 45, 987–1003.
454. Mano, Y.; Sugiyama, Y.; Ito, K. Use of a Physiologically Based Pharmacokinetic Model for Quantitative Prediction of Drug-Drug Interactions via CYP3A4 and Estimation of the Intestinal Availability of CYP3A4 Substrates. *J Pharm Sci* 2015, 104, 3183–3193.
455. Heinig, R.; Weimann, B.; Dietrich, H.; Böttcher, M.F. Pharmacokinetics of a New Orodispersible Tablet Formulation of Vardenafil: Results of Three Clinical Trials. *Clin Drug Investig* 2011, 31, 27–41.

456. Mostafa, N.M.; Chiu, Y.L.; Rosen, L.S.; Bessudo, A.; Kovacs, X.; Giranda, V.L. A Phase 1 Study to Evaluate Effect of Food on Veliparib Pharmacokinetics and Relative Bioavailability in Subjects with Solid Tumors. *Cancer Chemother Pharmacol* 2014, 74, 583–591.
457. Nuthalapati, S.; Munasinghe, W.; Giranda, V.; Xiong, H. Clinical Pharmacokinetics and Mass Balance of Veliparib in Combination with Temozolomide in Subjects with Nonhematologic Malignancies. *Clin Pharmacokinet* 2018, 57, 51–58.
458. Li, J.; Kim, S.; Sha, X.; Wiegand, R.; Wu, J.; Lorusso, P. Complex Disease-, Gene-, and Drug-Drug Interactions: Impacts of Renal Function, CYP2D6 Phenotype, and OCT2 Activity on Veliparib Pharmacokinetics. *Clin Cancer Res* 2014, 20, 3931–3944.
459. Li, X.; Delzer, J.; Voorman, R.; de Moraes, S.M.; Lao, Y. Disposition and Drug-Drug Interaction Potential of Veliparib (ABT-888), a Novel and Potent Inhibitor of Poly(ADP-Ribose) Polymerase. *Drug Metab Dispos* 2011, 39, 1161–1169.
460. Goldinger, S.M.; Rinderknecht, J.; Dummer, R.; Kuhn, F.P.; Yang, K.H.; Lee, L.; Ayala, R.C.; Racha, J.; Geng, W.; Moore, D.; et al. A Single-Dose Mass Balance and Metabolite-Profiling Study of Vemurafenib in Patients with Metastatic Melanoma. *Pharmacol Res Perspect* 2015, 3.
461. Ribas, A.; Zhang, W.; Chang, I.; Shirai, K.; Ernstoff, M.S.; Daud, A.; Cowey, C.L.; Daniels, G.; Seja, E.; O’Laco, E.; et al. The Effects of a High-Fat Meal on Single-Dose Vemurafenib Pharmacokinetics. *J Clin Pharmacol* 2014, 54, 368–374.
462. Salem, A.H.; Agarwal, S.K.; Dunbar, M.; Nuthalapati, S.; Chien, D.; Freise, K.J.; Wong, S.L. Effect of Low- and High-Fat Meals on the Pharmacokinetics of Venetoclax, a Selective First-in-Class BCL-2 Inhibitor. *J Clin Pharmacol* 2016, 56, 1355–1361.
463. Troy, S.M.; Parker, V.P.; Hicks, D.R.; Pollack, G.M.; Chiang, S.T. Pharmacokinetics and Effect of Food on the Bioavailability of Orally Administered Venlafaxine. *J Clin Pharmacol* 1997, 37, 954–961.
464. Shen, Z.; Gillen, M.; Miner, J.N.; Bucci, G.; Wilson, D.M.; Hall, J.W. Pharmacokinetics, Pharmacodynamics, and Tolerability of Verinurad, a Selective Uric Acid Reabsorption Inhibitor, in Healthy Adult Male Subjects. *Drug Des Devel Ther* 2017, 11, 2077–2086.
465. Smith, W.B.; Hall, J.; Berg, J.K.; Kazimir, M.; Yamamoto, A.; Walker, S.; Lee, C.A.; Shen, Z.; Wilson, D.M.; Zhou, D.; et al. Effect of Renal Impairment on the Pharmacokinetics and Pharmacodynamics of Verinurad, a Selective Uric Acid Reabsorption Inhibitor. *Clin Drug Investig* 2018, 38, 703–713.
466. Lee, C.A.; Yang, C.; Shah, V.; Shen, Z.; Wilson, D.M.; Ostertag, T.M.; Girardet, J.L.; Hall, J.; Gillen, M. Metabolism and Disposition of Verinurad, a Uric Acid Reabsorption Inhibitor, in Humans. *Drug Metab Dispos* 2018, 46, 532–541.
467. Rowinsky, E.K.; Lucas, V.S.; Hsieh, A.L.Y.; Wargin, W.A.; Hohnaker, J.A.; Lubejko, B.; Sartorius, S.E.; Donehower, R.C. The Effects of Food and Divided Dosing on the Bioavailability of Oral Vinorelbine. *Cancer Chemother Pharmacol* 1996, 39, 9–16.
468. Gauvin, A.; Pinguet, F.; Culine, S.; Astre, C.; Cupissol, D.; Bressolle, F. Blood and Plasma Pharmacokinetics of Vinorelbine in Elderly Patients with Advanced Metastatic Cancer. *Cancer Chemother Pharmacol* 2002, 49, 48–56.
469. Purkins, L.; Wood, N.; Kleinermans, D.; Greenhalgh, K.; Nichols, D. Effect of Food on the Pharmacokinetics of Multiple-Dose Oral Voriconazole. *Br J Clin Pharmacol* 2003, 56, 17–23.
470. Li, M.X.; Zhu, L.Q.; Chen, L.; Li, N.; Qi, F. Assessment of Drug-Drug Interactions between Voriconazole and Glucocorticoids. *J Chemother* 2018, 30, 296–303.
471. Theuretzbacher, U.; Ihle, F.; Derendorf, H. Pharmacokinetic/Pharmacodynamic Profile of Voriconazole. *Clin Pharmacokinet* 2006, 45, 649–663.
472. Dekhuijzen, P.N.R.; Koopmans, P.P. Pharmacokinetic Profile of Zafirlukast. *Clin Pharmacokinet* 2002, 41, 105–114.
473. Madsen, C.M.; Boyd, B.; Rades, T.; Müllertz, A. Supersaturation of Zafirlukast in Fasted and Fed State Intestinal Media with and without Precipitation Inhibitors. *Eur J Pharm Sci* 2016, 91, 31–39.
474. Devineni, D.; Gallo, J.M. Zalcitabine: Clinical Pharmacokinetics and Efficacy. *Clin Pharmacokinet* 1995, 28, 351–360.
475. Taylor, S.; Pereira, A.S. Antiretroviral Drug Concentrations in Semen of HIV-1 Infected Men. *Sex Transm Infect* 2001, 77, 4–11.
476. Nazareno, L.A.; Holazo, A.A.; Limjuco, R.; Passe, S.; Twardy, S.K.; Min, B.; Massarella, J.W. The Effect of Food on Pharmacokinetics of Zalcitabine in HIV-Positive Patients. *Pharm Res* 1995, 12, 1462–1465.
477. Awni, W.M.; Braeckman, R.A.; Granneman, G.R.; Witt, G.; Dubé, L.M. Pharmacokinetics and Pharmacodynamics of Zileuton after Oral Administration of Single and Multiple Dose Regimens of Zileuton 600mg in Healthy Volunteers. *Clin Pharmacokinet* 1995, 29, 22–33.
478. Awni, W.M.; Cavanaugh, J.H.; Witt, G.; Granneman, G.R.; Dubé, L.M. The Effect of Food on the Pharmacokinetics of Zileuton. *Clin Pharmacokinet* 1995, 29, 62–66.
479. Brown, D.; Scott, D.H.T.; Scott, D.B.; Meyer, M.; Westerlund, D.; Lundström, J. Pharmacokinetics of Zimelidine - Systemic Availability of Zimelidine and Norzimelidine in Human Volunteers. *Eur J Clin Pharmacol* 1980, 17, 111–116.
480. Preskorn, S.H. The Effect of Food on the Absorption of Oral Ziprasidone. *Clin Pharmacokinet* 2005, 44, 1117–1133.
481. Preskorn, S.H. Pharmacokinetics and Therapeutics of Acute Intramuscular Ziprasidone. *Clin Pharmacokinet* 2005, 44, 1117–1133.
482. Dixon, R.; Warrander, A. The Clinical Pharmacokinetics of Zolmitriptan. *Cephalalgia* 1997, 17, 15–20.

483. Seaber, E.J.; Peck, R.W.; Smith, D.A.; Allanson, J.; Hefting, N.R.; van Lier, J.J.; Sollie, F.A.E.; Wemer, J.; Jonkman, J.H.G. The Absolute Bioavailability and Effect of Food on the Pharmacokinetics of Zolmitriptan in Healthy Volunteers. *Br J Clin Pharmacol* 1998, 46, 433–439.
484. Paraiso, R.L.M.; Watanabe, A.; Andreas, C.J.; Turner, D.; Zane, P.; Dressman, J. In-Vitro-in-Silico Investigation of the Negative Food Effect of Zolpidem When Administered as Immediate-Release Tablets. *J Pharm Pharmacol* 2019, 71, 1663–1676.
485. Salvà, P.; Costa, J. Clinical Pharmacokinetics and Pharmacodynamics of Zolpidem: Therapeutic Implications. *Clin Pharmacokinet* 1995, 29, 142–153.
486. Greenblatt, D.J.; Harmatz, J.S.; Singh, N.N.; Roth, T.; Harris, S.C.; Kapil, R.P. Influence of Food on Pharmacokinetics of Zolpidem from Fast Dissolving Sublingual Zolpidem Tartrate Tablets. *J Clin Pharmacol* 2013, 53, 1194–1198.
487. Jerling, M.; Dahl, M.L.; Åberg-Wistedt, A.; Liljenberg, B.; Landell, N.E.; Bertilsson, L.; Sjöqvist, F. The CYP2D6 Genotype Predicts the Oral Clearance of the Neuroleptic Agents Perphenazine and Zuclopenthixol. *Clin Pharmacol Ther* 1996, 59, 423–428.
488. Aaes-Jørgensen T.; Liedholm H.; Melander A. Influence of Food Intake on the Bioavailability of Zuclopenthixol. *Drug Nutr Interact* 1987, 5, 157–160.
489. Boulton, D.W.; DeVane, C.L.; Liston, H.L.; Markowitz, J.S. In Vitro P-Glycoprotein Affinity for Atypical and Conventional Antipsychotics. *Life Sci* 2002, 71, 163–169.
490. Du, P.; Li, P.; Liu, H.; Zhao, R.; Zhao, Z.; Yu, W.; Zhou, X.; Liu, L. Open-Label, Randomized, Single-Dose, 2-Period, 2-Sequence Crossover, Comparative Pharmacokinetic Study to Evaluate Bioequivalence of 2 Oral Formulations of Olanzapine Under Fasting and Fed Conditions. *Clin Pharmacol Drug Dev* 2020, 9, 621–628.
491. Tóth, K.; Sirok, D.; Kiss, Á.; Mayer, A.; Pátfalusi, M.; Hirka, G.; Monostory, K. Utility of in Vitro Clearance in Primary Hepatocyte Model for Prediction of in Vivo Hepatic Clearance of Psychopharmacs. *Microchemical J* 2018, 136, 193–199.
492. Hu, C.; Chen, X.; Zhao, Z.; Gao, D.; Gong, S.; Zhang, L.; Xu, Y.; Li, L.; Zhang, L. A Two-Sequence, Four-Period, Crossover, Replicate Study to Demonstrate Bioequivalence of Warfarin Sodium Tablet in Healthy Chinese Subjects Under Fasting and Fed Conditions. *Clin Pharmacol Drug Dev* 2020, 9, 527–536.
493. Zaman, R.; Wilkins, M.R.; Kendall, M.J.; Jack, D.B. The Effect of Food and Alcohol on the Pharmacokinetics of Acebutolol and Its Metabolite, Diacetolol. *Biopharm Drug Dispos* 1984, 5, 91–95.
494. Ochoa, D.; Román, M.; Cabaleiro, T.; Saiz-Rodríguez, M.; Mejía, G.; Abad-Santos, F. Effect of Food on the Pharmacokinetics of Omeprazole, Pantoprazole and Rabeprazole. *BMC Pharmacol Toxicol* 2020, 21.
495. Shibata, M.; Toyoshima, J.; Kaneko, Y.; Oda, K.; Kiyota, T.; Kambayashi, A.; Nishimura, T. The Bioequivalence of Two Peficitinib Formulations, and the Effect of Food on the Pharmacokinetics of Peficitinib: Two-Way Crossover Studies of a Single Dose of 150 Mg Peficitinib in Healthy Volunteers. *Clin Pharmacol Drug Dev* 2021, 10, 283–290.
496. Yamamoto, S.; Kosugi, Y.; Hirabayashi, H.; Moriwaki, T. Impact of P-Glycoprotein on Intestinal Absorption of an Inhibitor of Apoptosis Protein Antagonist in Rats: Mechanisms of Nonlinear Pharmacokinetics and Food Effects. *Pharm Res* 2018, 35, 1–8.
